# Supplementary material for: An Improved Genome-Wide Association Procedure Explores Gene–Allele Constitutions and Evolutionary Drives of Growth Period Traits in the Global Soybean Germplasm Population
Source: MDPI journal article supplement (doi:10.3390/ijms24119570), 2023-05-31
Supplement: s1 [file s1]

# Supplementary Materials

## Supplementary Figures

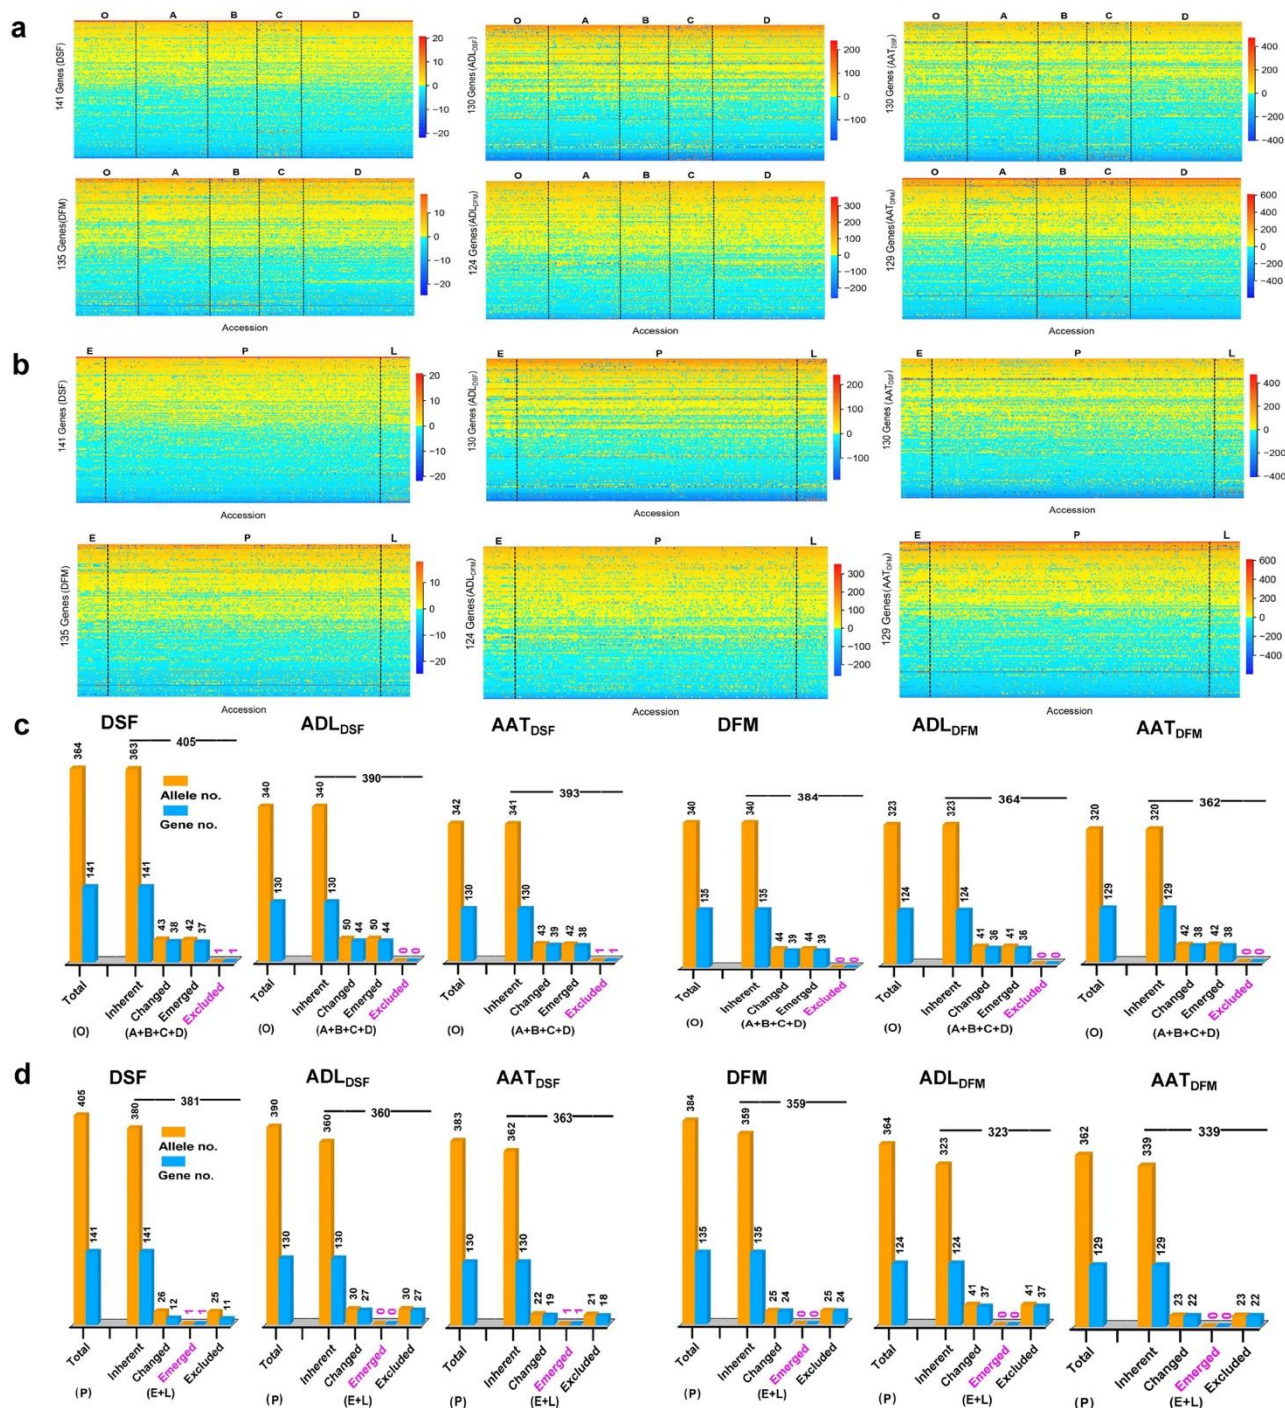

**Figure S1.** Allelic differentiation of six DSF- and DFM-related traits among geographic and MG-set subpopulations in the WSGP.

(a) The allele matrix of required ADL and AAT for growth period traits among geographic subpopulations in the WSGP; (b) The allele matrix of required ADL and AAT for growth period traits among maturity groups in the WSGP; (c) The alleles of required ADL and AAT for growth period traits changed in A+B+C+D compared with those in O in the WSGP;

(d) The alleles of required ADL and AAT for growth period traits changed in E+L compared with those in P in the WSGP. Note: DSF: days from sowing-to-flowering;  $ADL_{DSF}$ : DSF required accumulative day-length;  $AAT_{DSF}$ : DSF required accumulative active temperature; DFM: days from flowering-to-maturity;  $ADL_{DFM}$ : DFM required accumulative day-length;  $AAT_{DFM}$ : DFM required accumulative active temperature. “O” represents the center of origin; “A” represents Northeast China (NCHN), far-east of Russia (RUFE), and southern Sweden (SSWE); “B” represents the Korea Peninsular (KORP) and Japan Islands (JPAN); “C” represents Southeast Asia (SEAS), South Asia (SASI), and Africa (AFRI); “D” represents northern North America (NNAM), southern North America (SNAM), and Central and South America (CSAM). MG: maturity group; “E” represents the early MG-set (MG 000-0); “P” represents the primary MG-set (MG I-VII), “L” represents the late MG-set (MG VIII-X); A+B+C+D: represents a subpopulation composed of geographic subpopulation materials from A, B, C, and D; E+L: represents a subpopulation composed of geographic subpopulation materials from E and L.

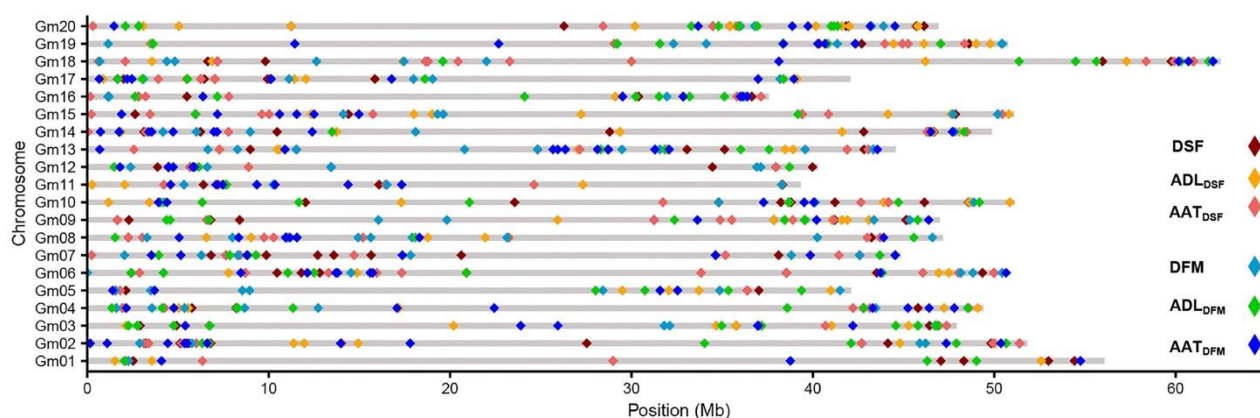

**Figure S2.** Distribution of all genes associated with six DSF- and DFM-related traits on chromosomes in the WSGP. Note: DSF: days from sowing-to-flowering;  $ADL_{DSF}$ : DSF required accumulative day-length;  $AAT_{DSF}$ : DSF required accumulative active temperature; DFM: days from flowering-to-maturity;  $ADL_{DFM}$ : DFM required accumulative day-length;  $AAT_{DFM}$ : DFM required accumulative active temperature.

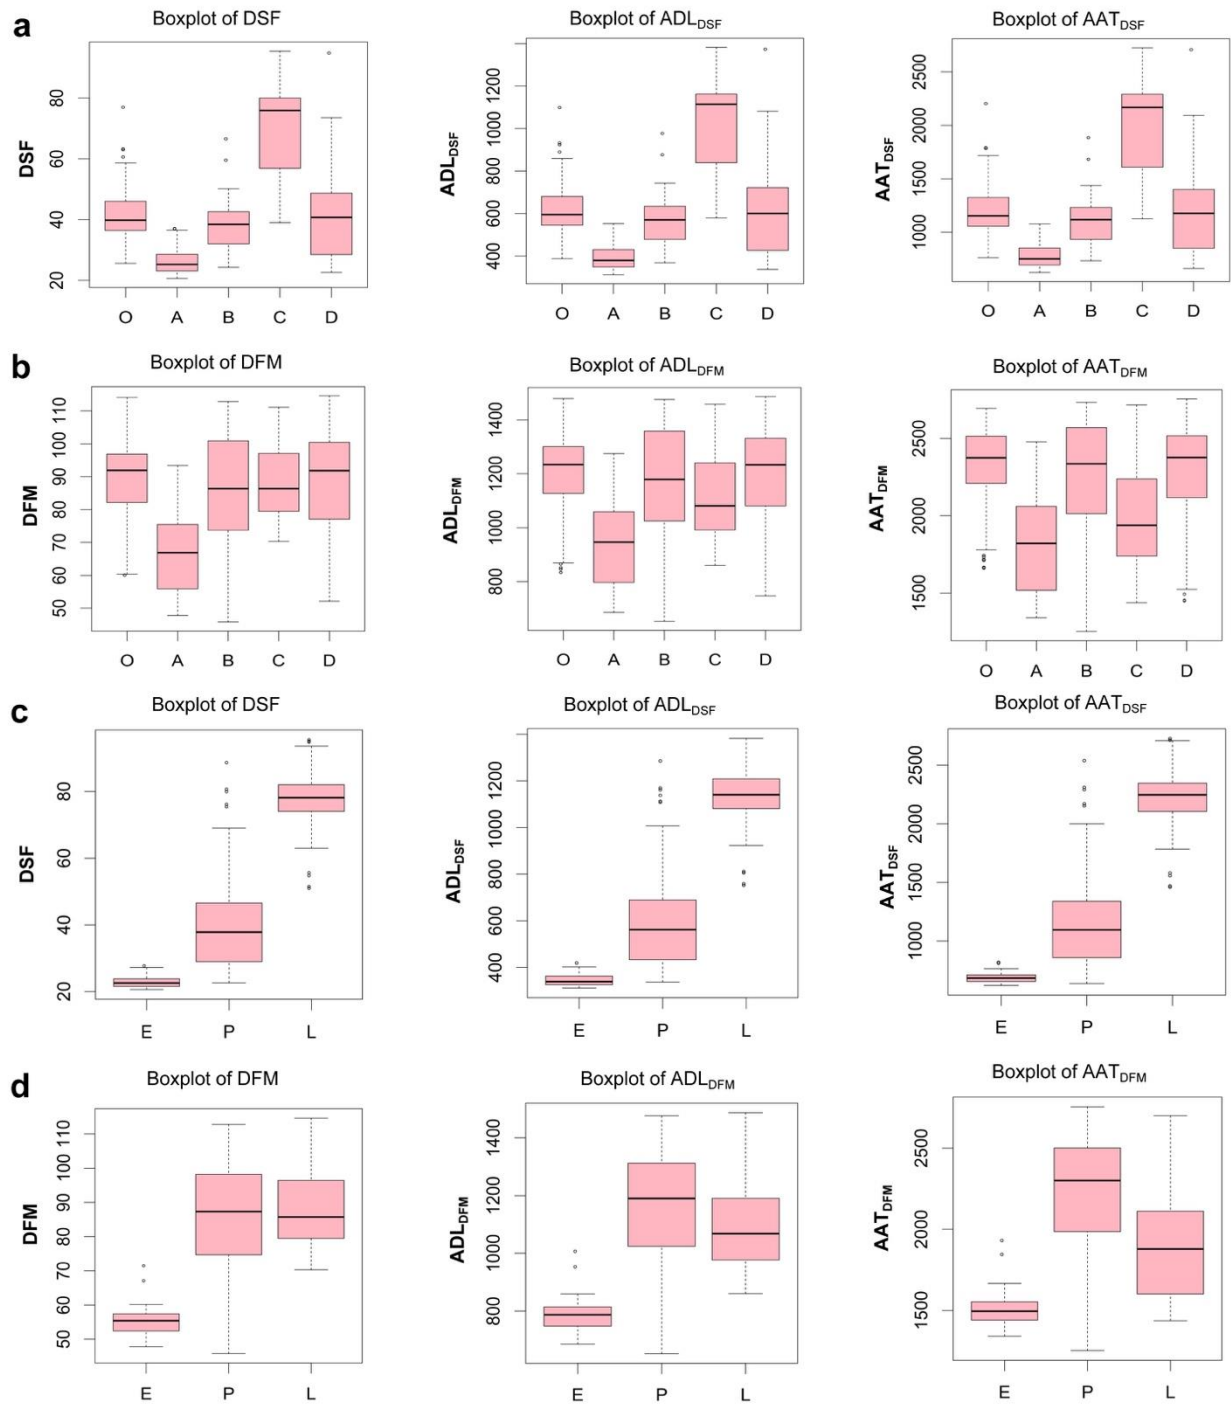

**Figure S3.** Boxplots of six DSF- and DFM-related traits for geographic subpopulations and MG-sets in the WSGP. Note: DSF: days from sowing-to-flowering;  $ADL_{DSF}$ : DSF required accumulative day-length;  $AAT_{DSF}$ : DSF required accumulative active temperature; DFM: days from flowering-to-maturity;  $ADL_{DFM}$ : DFM required accumulative day-length;  $AAT_{DFM}$ : DFM required accumulative active temperature. “O” represents the center of origin; “A” represents Northeast China (NCHN), far-east of Russia (RUFE), and southern Sweden (SSWE); “B” represents the Korea Peninsular (KORP) and Japan Islands (JPAN); “C” represents Southeast Asia (SEAS), South Asia (SASI), and Africa (AFRI); “D” represents northern North America (NNAM), southern North America (SNAM), and Central and South America (CSAM). MG: maturity group; “E” represents the early MG-set (MG 000-0); “P” represents the primary MG-set (MG I-VII); “L”



represents the late MG-set (MG VIII-X).

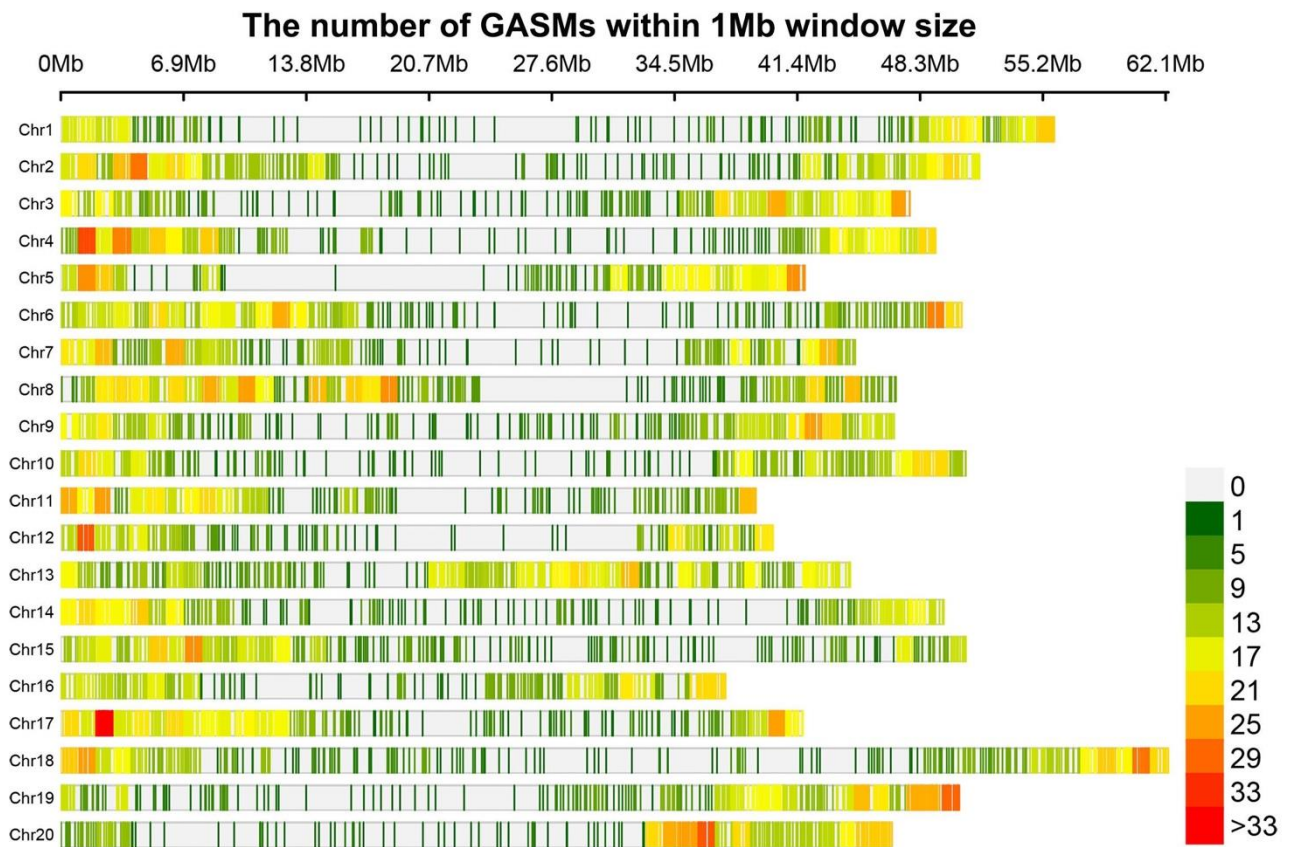

**Figure S4.** The distribution of GASMs on chromosomes in the WSGP.

## Supplementary Tables

**Table S1** Variation in six DSF- and DFM-related traits among geographic regions and MG-sets in the WSGP.

| Factor | Sub-population | No. | DSF (d)<br>( $h^2 = 95.7\%$ )  | ADL <sub>DSF</sub> (d•h)<br>( $h^2 = 95.8\%$ ) | AAT <sub>DSF</sub> (d•°C)<br>( $h^2 = 99.2\%$ ) |
|--------|----------------|-----|--------------------------------|------------------------------------------------|-------------------------------------------------|
|        |                |     | Mean (Range)                   | Mean (Range)                                   | Mean (Range)                                    |
| GS     | O              | 65  | 41.9 <sup>b</sup> §(25.6-77.0) | 621.9 <sup>b</sup> (388.4-1098.8)              | 1211.1 <sup>b</sup> (763.5-2202.8)              |
|        | A              | 75  | 26.4 <sup>c</sup> (20.6-37.1)  | 397.5 <sup>c</sup> (311.7-552.5)               | 785.4 <sup>c</sup> (622.4-1077.6)               |
|        | B              | 51  | 38.1 <sup>b</sup> (24.3-66.6)  | 565.9 <sup>b</sup> (368.6-975.7)               | 1105.5 <sup>b</sup> (734.5-1883.9)              |
|        | C              | 45  | 70.6 <sup>a</sup> (39.0-95.5)  | 1035.4 <sup>a</sup> (579.0-1382.3)             | 2017.8 <sup>a</sup> (1125.4-2726.2)             |
|        | D              | 117 | 39.4 <sup>b</sup> (22.6-94.8)  | 584.9 <sup>b</sup> (336.8-1372.7)              | 1143.7 <sup>b</sup> (661.3-2708.3)              |
| MG     | E              | 31  | 23.0 <sup>c</sup> (20.6-27.7)  | 346.0 <sup>c</sup> (311.7-418.9)               | 691.3 <sup>c</sup> (622.6-819.1)                |
|        | P              | 292 | 39.1 <sup>b</sup> (22.6-88.6)  | 580.5 <sup>b</sup> (336.8-1285.2)              | 1132.8 <sup>b</sup> (638.2-2539.0)              |
|        | L              | 30  | 77.5 <sup>a</sup> (51.0-95.5)  | 1129.6 <sup>a</sup> (751.7-1382.3)             | 2213.7 <sup>a</sup> (1458.5-2726.2)             |
| Total  |                | 353 | 41.0 (20.6-95.5)               | 606.6 (311.7-1382.3)                           | 1185.9 (622.6-2726.2)                           |
| Factor | Sub-population | No. | DFM (d)<br>( $h^2 = 80.7\%$ )  | ADL <sub>DFM</sub> (d•h)<br>( $h^2 = 78.5\%$ ) | AAT <sub>DFM</sub> (d•°C)<br>( $h^2 = 70.9\%$ ) |
|        |                |     | Mean (Range)                   | Mean (Range)                                   | Mean (Range)                                    |
| GS     | O              | 65  | 88.1 <sup>a</sup> (60.1-114.1) | 1191.9 <sup>a</sup> (834.0-1479.4)             | 2289.7 <sup>a</sup> (1661.1-2694.1)             |
|        | A              | 75  | 66.5 <sup>b</sup> (47.8-93.4)  | 936.2 <sup>b</sup> (685.0-1274.8)              | 1814.7 <sup>c</sup> (1339.8-2477.6)             |
|        | B              | 51  | 85.1 <sup>a</sup> (45.8-112.8) | 1159.1 <sup>a</sup> (652.0-1476.4)             | 2228.1 <sup>a</sup> (1251.5-2732.9)             |
|        | C              | 45  | 87.8 <sup>a</sup> (70.3-111.1) | 1120.8 <sup>a</sup> (859.5-1458.0)             | 2016.9 <sup>b</sup> (1437.5-2715.7)             |
|        | D              | 117 | 88.7 <sup>a</sup> (52.1-114.6) | 1200.6 <sup>a</sup> (746.8-1487.4)             | 2289.8 <sup>a</sup> (1449.1-2755.2)             |
| MG     | E              | 31  | 55.6 <sup>b</sup> (47.8-71.5)  | 791.5 <sup>b</sup> (685.0-1006.8)              | 1514.9 <sup>c</sup> (1340.0-1931.0)             |
|        | P              | 292 | 85.7 <sup>a</sup> (45.8-112.8) | 1165.0 <sup>a</sup> (652.0-1476.4)             | 2235.1 <sup>a</sup> (1252.0-2755.0)             |
|        | L              | 30  | 87.6 <sup>a</sup> (70.3-114.6) | 1099.7 <sup>a</sup> (859.5-1487.4)             | 1920.6 <sup>b</sup> (1437.0-2700.0)             |
| Total  |                | 353 | 83.3 (45.8-114.6)              | 1126.7 (652.0-1487.4)                          | 2145.1 (1251.5-2755.2)                          |

Note: GS: geographic subpopulations; MG: maturity group; DSF: days from sowing-to-flowering; ADL<sub>DSF</sub>: DSF required accumulative day-length; AAT<sub>DSF</sub>: DSF required accumulative active temperature; DFM: days from flowering-to-maturity; ADL<sub>DFM</sub>: DFM required accumulative day-length; AAT<sub>DFM</sub>: DFM required accumulative active temperature. No.: the number of accessions;  $h^2$ : heritability value calculated from ANOVA; “O” represents the center of origin; “A” represents Northeast China (NCHN), far-east of Russia (RUF), and southern Sweden (SSWE); “B” represents the Korea Peninsular (KORP) and Japan Islands (JPAN); “C” represents Southeast Asia (SEAS), South Asia (SASI), and Africa (AFRI); “D” represents northern North America (NNAM), southern North America (SNAM), and Central and South America (CSAM); “E” represents the early MG-set (MG 000-0); “P” represents the primary MG-set (MG I-VII); “L” represents the late MG-set (MG VIII-X); §: the superscripts of a, b, c, and d indicate differences at  $p \leq 0.05$  significance level in multiple comparisons.

**Table S2** The gene–allele system conferring DSF identified from GASM-RTM-GWAS in the WSGP.

| Gene Code          | Genes                | Allele no. | Model P | Main-effect |                | Gene×Env. |                | Reported Genes/QTLs                                                                       | Reported in Liu et al. 2021 | Gene group |
|--------------------|----------------------|------------|---------|-------------|----------------|-----------|----------------|-------------------------------------------------------------------------------------------|-----------------------------|------------|
|                    |                      |            |         | -lg(P)      | R <sup>2</sup> | -lg(P)    | R <sup>2</sup> |                                                                                           |                             |            |
| <i>g-DSF-01-1</i>  | <i>Glyma01g03040</i> | 2          | 31.5    | 0.85        | 226.7          |           |                |                                                                                           |                             | ⑧          |
| <i>g-DSF-01-2</i>  | <i>Glyma01g22830</i> | 2          | 61.2    | 3.05        | 307.7          |           |                | <i>Fflr 8-1</i>                                                                           | √                           | ⑤          |
| <i>g-DSF-01-3</i>  | <i>Glyma01g34630</i> | 2          | 12.1    | 0.06        | 20.3           |           |                |                                                                                           |                             | ⑧          |
| <i>g-DSF-01-4</i>  | <i>Glyma01g35820</i> | 2          | 5.5     | 0.01        | 4              |           |                |                                                                                           |                             | ⑥          |
| <i>g-DSF-01-5</i>  | <i>Glyma01g41520</i> | 2          | 16      | 0.2         | 62.4           |           |                |                                                                                           |                             | ⑤/⑦/⑥      |
| <i>g-DSF-01-6</i>  | <i>Glyma01g43400</i> | 4          | 22      | 0.55        | 152.6          |           |                |                                                                                           |                             | ⑩          |
| <i>g-DSF-02-1</i>  | <i>Glyma02g03920</i> | 2          | 30.8    | 1.25        | 309.6          |           |                |                                                                                           |                             | ⑩          |
| <i>g-DSF-02-2</i>  | <i>Glyma02g04010</i> | 2          | 5.8     | 0.01        | 5.6            |           |                |                                                                                           |                             | ⑧          |
| <i>g-DSF-02-3</i>  | <i>Glyma02g04190</i> | 3          | 41.5    | 2.98        | 307.7          | 0.19      | 53.6           |                                                                                           |                             | ⑤/⑧        |
| <i>g-DSF-02-4</i>  | <i>Glyma02g06420</i> | 3          | 8.9     | 0.03        | 8.6            |           |                |                                                                                           |                             | ⑤/⑧        |
| <i>g-DSF-02-5</i>  | <i>Glyma02g07010</i> | 4          | 27      | 0.87        | 228.6          |           |                |                                                                                           |                             | ⑦          |
| <i>g-DSF-02-6</i>  | <i>Glyma02g08790</i> | 2          | 2.7     | 4.2E-03     | 1.9            |           |                | <i>GmFT2c(421.7Kb)</i>                                                                    |                             | ②/①        |
| <i>g-DSF-02-7</i>  | <i>Glyma02g26620</i> | 2          | 6.2     | 0.03        | 9.5            |           |                | <i>Fflr 13-4</i>                                                                          |                             | ①          |
| <i>g-DSF-02-8</i>  | <i>Glyma02g37350</i> | 3          | 27.5    | 0.63        | 174.8          | 0.31      | 88.7           | <i>Fflr 24-1</i>                                                                          |                             | ⑦          |
| <i>g-DSF-02-9</i>  | <i>Glyma02g38790</i> | 2          | 8.4     | 0.05        | 15.5           |           |                | <i>Fflr 15-1</i>                                                                          |                             | ⑩          |
| <i>g-DSF-02-10</i> | <i>Glyma02g45630</i> | 2          | 6       | 0.01        | 4.5            |           |                |                                                                                           |                             | ⑥/⑧        |
| <i>g-DSF-02-11</i> | <i>Glyma02g48010</i> | 2          | 39.8    | 2.08        | 307.7          | 0.33      | 95.9           |                                                                                           |                             | ⑩          |
| <i>g-DSF-03-1</i>  | <i>Glyma03g02940</i> | 6          | 12      | 0.08        | 23.4           |           |                |                                                                                           |                             | ⑩          |
| <i>g-DSF-03-2</i>  | <i>Glyma03g03120</i> | 5          | 15.8    | 0.14        | 42.2           |           |                |                                                                                           |                             | ①          |
| <i>g-DSF-03-3</i>  | <i>Glyma03g04720</i> | 6          | 15.5    | 0.22        | 64.4           |           |                |                                                                                           |                             | ⑩          |
| <i>g-DSF-03-4</i>  | <i>Glyma03g27970</i> | 4          | 15      | 0.16        | 48.7           |           |                |                                                                                           | √                           | ③/⑦        |
| <i>g-DSF-03-5</i>  | <i>Glyma03g40780</i> | 3          | 10      | 0.07        | 20.8           |           |                |                                                                                           |                             | ③/⑧        |
| <i>g-DSF-03-6</i>  | <i>Glyma03g41290</i> | 2          | 5.2     | 0.04        | 12.3           |           |                | <i>LHY2b(693.3Kb)</i>                                                                     |                             | ⑧          |
| <i>g-DSF-04-1</i>  | <i>Glyma04g07430</i> | 2          | 6.5     | 0.02        | 8.2            |           |                | <i>J(ELF3,1738.3Kb)</i>                                                                   |                             | ⑧          |
| <i>g-DSF-04-2</i>  | <i>Glyma04g09910</i> | 2          | 11.6    | 0.11        | 36.2           |           |                | <i>CRY1a(1061.6Kb)</i>                                                                    |                             | ⑦          |
| <i>g-DSF-04-3</i>  | <i>Glyma04g36240</i> | 3          | 29.6    | 1.06        | 269.5          |           |                |                                                                                           |                             | ⑩          |
| <i>g-DSF-04-4</i>  | <i>Glyma04g39610</i> | 2          | 1.7     | 0.01        | 3.2            |           |                |                                                                                           |                             | ⑥          |
| <i>g-DSF-05-1</i>  | <i>Glyma05g02140</i> | 3          | 28.6    | 0.8         | 214.2          |           |                |                                                                                           | √                           | ⑩          |
| <i>g-DSF-05-2</i>  | <i>Glyma05g02790</i> | 2          | 11.3    | 0.04        | 12.9           |           |                |                                                                                           | √                           | ⑥          |
| <i>g-DSF-05-3</i>  | <i>Glyma05g31250</i> | 3          | 17.4    | 0.19        | 59.3           |           |                |                                                                                           |                             | ③          |
| <i>g-DSF-05-4</i>  | <i>Glyma05g32030</i> | 2          | 3.2     | 4.8E-03     | 2.1            |           |                |                                                                                           |                             | ⑧          |
| <i>g-DSF-06-1</i>  | <i>Glyma06g03470</i> | 2          | 6.8     | 0.04        | 12.7           |           |                |                                                                                           | √                           | ⑤          |
| <i>g-DSF-06-2</i>  | <i>Glyma06g13320</i> | 2          | 10.5    | 0.05        | 17.6           |           |                |                                                                                           |                             | ⑧          |
| <i>g-DSF-06-3</i>  | <i>Glyma06g15020</i> | 2          | 2.7     | 3.8E-03     | 1.7            |           |                | <i>WRKY76(268.4Kb)</i>                                                                    |                             | ⑥          |
| <i>g-DSF-06-4</i>  | <i>Glyma06g16330</i> | 4          | 6.8     | 0.02        | 4.2            |           |                |                                                                                           |                             | ⑩          |
| <i>g-DSF-06-5</i>  | <i>Glyma06g23580</i> | 4          | 68.5    | 4.25        | 307.7          |           |                | <i>E1(696.3Kb), Fflr 8-1,9-1,10-1,20-1, 22-2,23-1,26-10,26-11,26-13,26-15,26-16,26-17</i> | √                           | ⑩          |
| <i>g-DSF-06-6</i>  | <i>Glyma06g36380</i> | 2          | 38      | 1.93        | 307.7          |           |                | <i>Fflr 3-1,7-1,8-1,9-1,10-1,18-1, 20-1,22-2,23-1,26-10,26-13,26-16,26-18</i>             |                             | ④          |
| <i>g-DSF-06-7</i>  | <i>Glyma06g40370</i> | 4          | 23.8    | 0.4         | 115.2          |           |                | <i>Fflr 2-1,9-1,10-1,20-1</i>                                                             | √                           | ⑧          |
| <i>g-DSF-06-8</i>  | <i>Glyma06g46781</i> | 3          | 12.6    | 0.06        | 18.9           |           |                |                                                                                           |                             | ⑨          |
| <i>g-DSF-06-9</i>  | <i>Glyma06g47590</i> | 4          | 13.6    | 0.11        | 32.6           |           |                |                                                                                           |                             | ⑩          |
| <i>g-DSF-07-1</i>  | <i>Glyma07g08214</i> | 2          | 13.3    | 0.11        | 36.7           |           |                | <i>Fflr 2-2</i>                                                                           |                             | ⑧          |
| <i>g-DSF-07-2</i>  | <i>Glyma07g09170</i> | 8          | 14.5    | 0.14        | 37.7           |           |                | <i>Fflr 2-2</i>                                                                           |                             | ⑩          |
| <i>g-DSF-07-3</i>  | <i>Glyma07g09860</i> | 2          | 2       | 2.5E-03     | 1.3            |           |                | <i>Fflr 2-2</i>                                                                           |                             | ⑧          |
| <i>g-DSF-07-4</i>  | <i>Glyma07g11670</i> | 3          | 30.2    | 0.79        | 211.6          |           |                | <i>Fflr 2-2</i>                                                                           |                             | ⑧          |
| <i>g-DSF-07-5</i>  | <i>Glyma07g13710</i> | 2          | 6.4     | 0.02        | 8.6            |           |                |                                                                                           |                             | ⑩          |
| <i>g-DSF-07-6</i>  | <i>Glyma07g14242</i> | 2          | 2.9     | 0.01        | 2.4            |           |                |                                                                                           |                             | ⑩          |

|                    |                      |   |       |         |       |                                      |   |         |
|--------------------|----------------------|---|-------|---------|-------|--------------------------------------|---|---------|
| <i>g-DSF-07-7</i>  | <i>Glyma07g15930</i> | 4 | 18.3  | 0.18    | 54.1  |                                      |   | ⑥       |
| <i>g-DSF-07-8</i>  | <i>Glyma07g20421</i> | 2 | 4.3   | 0.02    | 6.1   |                                      |   | ⑩       |
| <i>g-DSF-07-9</i>  | <i>Glyma07g29650</i> | 2 | 23.7  | 0.36    | 106.8 |                                      | √ | ⑨       |
| <i>g-DSF-07-10</i> | <i>Glyma07g33190</i> | 2 | 12.3  | 0.1     | 32.6  |                                      | √ | ⑩       |
| <i>g-DSF-07-11</i> | <i>Glyma07g37580</i> | 2 | 22.2  | 0.36    | 106.3 |                                      |   | ⑩       |
| <i>g-DSF-08-1</i>  | <i>Glyma08g03210</i> | 4 | 66.7  | 6.07    | 307.7 | 0.19 51.3                            | √ | ⑨       |
| <i>g-DSF-08-2</i>  | <i>Glyma08g15181</i> | 3 | 14.1  | 0.04    | 12.6  |                                      |   | ⑩       |
| <i>g-DSF-08-3</i>  | <i>Glyma08g43390</i> | 4 | 28.4  | 0.81    | 214.5 |                                      | √ | ⑨       |
| <i>g-DSF-09-1</i>  | <i>Glyma09g02470</i> | 3 | 40.2  | 2.81    | 307.7 | 0.43 119.7                           |   | ⑧       |
| <i>g-DSF-09-2</i>  | <i>Glyma09g03270</i> | 3 | 8.9   | 0.04    | 12.9  |                                      | √ | ⑥       |
| <i>g-DSF-09-3</i>  | <i>Glyma09g07803</i> | 3 | 6.4   | 0.02    | 6.6   | <i>Fflr 24-2</i>                     | √ | ⑩       |
| <i>g-DSF-09-4</i>  | <i>Glyma09g08940</i> | 2 | 13.6  | 0.13    | 41.1  | <i>Fflr 21-3,24-2</i>                | √ | ⑩       |
| <i>g-DSF-09-5</i>  | <i>Glyma09g25215</i> | 2 | 21.1  | 0.33    | 98.9  | <i>Fflr 24-2</i>                     |   | ④/⑥     |
| <i>g-DSF-09-6</i>  | <i>Glyma09g31087</i> | 2 | 14.7  | 0.1     | 33    |                                      |   | ⑧       |
| <i>g-DSF-09-7</i>  | <i>Glyma09g34850</i> | 4 | 32.6  | 1.79    | 307.7 |                                      |   | ⑨       |
| <i>g-DSF-09-8</i>  | <i>Glyma09g34940</i> | 2 | 6.4   | 0.03    | 10    |                                      |   | ⑧/⑨     |
| <i>g-DSF-09-9</i>  | <i>Glyma09g40181</i> | 2 | 2.4   | 4.6E-03 | 2.1   |                                      | √ | ⑦       |
| <i>g-DSF-09-10</i> | <i>Glyma09g40230</i> | 4 | 10.2  | 0.06    | 19.5  |                                      | √ | ⑤/③/⑦   |
| <i>g-DSF-10-1</i>  | <i>Glyma10g11700</i> | 3 | 4.7   | 0.02    | 6.2   | <i>Fflr 13-10</i>                    |   | ⑩       |
| <i>g-DSF-10-2</i>  | <i>Glyma10g19040</i> | 2 | 1.6   | 3.9E-03 | 1.8   | <i>Fflr 13-10</i>                    |   | ⑩       |
| <i>g-DSF-10-3</i>  | <i>Glyma10g26450</i> | 5 | 31.7  | 1.69    | 307.7 | <i>E4(PhyA,2112.8Kb), Fflr 13-10</i> |   | ④/⑤/③   |
| <i>g-DSF-10-4</i>  | <i>Glyma10g29380</i> | 2 | 8.6   | 0.04    | 12.1  | <i>E4(PhyA1,1269.7Kb)</i>            |   | ②       |
| <i>g-DSF-10-5</i>  | <i>Glyma10g30100</i> | 3 | 5.4   | 0.04    | 13    |                                      |   | ⑥       |
| <i>g-DSF-10-6</i>  | <i>Glyma10g32840</i> | 2 | 17.4  | 0.1     | 33.3  |                                      |   | ⑤       |
| <i>g-DSF-10-7</i>  | <i>Glyma10g35960</i> | 2 | 31    | 0.97    | 253.1 | <i>E2(GmG1,545.6Kb),Fflr 24-4</i>    |   | ⑦       |
| <i>g-DSF-10-8</i>  | <i>Glyma10g38360</i> | 2 | 3.8   | 2.7E-03 | 1.3   |                                      |   | ⑨       |
| <i>g-DSF-10-9</i>  | <i>Glyma10g41540</i> | 3 | 13.3  | 0.1     | 30.7  |                                      |   | ⑤       |
| <i>g-DSF-11-1</i>  | <i>Glyma11g09060</i> | 2 | 15    | 0.13    | 40.3  |                                      |   | ⑦/⑧     |
| <i>g-DSF-11-2</i>  | <i>Glyma11g10100</i> | 3 | 6.7   | 0.02    | 7.9   |                                      |   | ①/⑧     |
| <i>g-DSF-11-3</i>  | <i>Glyma11g14500</i> | 3 | 34.2  | 1.42    | 307.7 | 0.62 168.3                           |   | ⑩       |
| <i>g-DSF-11-4</i>  | <i>Glyma11g19400</i> | 2 | 1.6   | 4.7E-03 | 2.1   | <i>Fflr 8-4</i>                      | √ | ⑩       |
| <i>g-DSF-11-5</i>  | <i>Glyma11g19670</i> | 3 | 31.1  | 1.04    | 266.5 | 0.19 55.3 <i>Fflr 8-4</i>            | √ | ⑧       |
| <i>g-DSF-11-6</i>  | <i>Glyma11g37110</i> | 2 | 21.3  | 0.46    | 133.9 |                                      |   | ①       |
| <i>g-DSF-12-1</i>  | <i>Glyma12g05780</i> | 4 | 10    | 0.05    | 16.2  |                                      |   | ⑨       |
| <i>g-DSF-12-2</i>  | <i>Glyma12g08000</i> | 4 | 29.8  | 1.59    | 307.7 | <i>PRR3b(152.2Kb),Fflr 25-2</i>      |   | ⑩       |
| <i>g-DSF-12-3</i>  | <i>Glyma12g30870</i> | 3 | 10.8  | 0.05    | 16.6  |                                      |   | ⑩       |
| <i>g-DSF-12-4</i>  | <i>Glyma12g34830</i> | 3 | 20.6  | 0.36    | 105.2 |                                      |   | ⑩       |
| <i>g-DSF-12-5</i>  | <i>Glyma12g36990</i> | 4 | 21    | 0.44    | 124.9 |                                      |   | ⑩       |
| <i>g-DSF-13-1</i>  | <i>Glyma13g07110</i> | 3 | 112.1 | 5.6     | 307.7 |                                      |   | ⑦       |
| <i>g-DSF-13-2</i>  | <i>Glyma13g08490</i> | 2 | 1.9   | 0.01    | 3.5   |                                      | √ | ⑤       |
| <i>g-DSF-13-3</i>  | <i>Glyma13g09970</i> | 6 | 21.2  | 0.43    | 121.1 | <i>Fflr 25-1</i>                     | √ | ⑩       |
| <i>g-DSF-13-4</i>  | <i>Glyma13g21340</i> | 3 | 10.6  | 0.01    | 2.4   |                                      |   | ⑧       |
| <i>g-DSF-13-5</i>  | <i>Glyma13g25480</i> | 6 | 2.7   | 0.01    | 2.3   |                                      | √ | ④       |
| <i>g-DSF-13-6</i>  | <i>Glyma13g30420</i> | 3 | 4.7   | 0.02    | 6.4   |                                      |   | ⑩       |
| <i>g-DSF-13-7</i>  | <i>Glyma13g33260</i> | 2 | 2.6   | 0.01    | 4.7   |                                      |   | ⑧       |
| <i>g-DSF-13-8</i>  | <i>Glyma13g43050</i> | 2 | 24.6  | 0.57    | 162.5 |                                      |   | ⑤/⑦     |
| <i>g-DSF-14-1</i>  | <i>Glyma14g04550</i> | 2 | 31.7  | 0.95    | 247.8 |                                      | √ | ⑤/②/⑥/⑦ |
| <i>g-DSF-14-2</i>  | <i>Glyma14g08220</i> | 3 | 8     | 0.03    | 10.7  |                                      | √ | ⑦       |
| <i>g-DSF-14-3</i>  | <i>Glyma14g11910</i> | 2 | 23.1  | 0.43    | 127.1 |                                      |   | ⑩       |
| <i>g-DSF-14-4</i>  | <i>Glyma14g24140</i> | 3 | 6.6   | 0.01    | 3.5   |                                      |   | ⑦       |
| <i>g-DSF-14-5</i>  | <i>Glyma14g34340</i> | 3 | 8.5   | 0.02    | 5.7   | <i>Fflr 21-1</i>                     |   | ⑩       |
| <i>g-DSF-14-6</i>  | <i>Glyma14g37100</i> | 2 | 13    | 0.12    | 38.9  |                                      |   | ⑩       |

|                    |                      |                        |       |      |       |                                                                                     |                 |       |
|--------------------|----------------------|------------------------|-------|------|-------|-------------------------------------------------------------------------------------|-----------------|-------|
| <i>g-DSF-14-7</i>  | <i>Glyma14g37330</i> | 3                      | 9.8   | 0.08 | 25    |                                                                                     |                 | ⑤/⑥   |
| <i>g-DSF-14-8</i>  | <i>Glyma14g37400</i> | 5                      | 15.6  | 0.18 | 53.3  |                                                                                     |                 | ②     |
| <i>g-DSF-14-9</i>  | <i>Glyma14g38570</i> | 5                      | 18.9  | 0.49 | 138.5 |                                                                                     | √               | ⑩     |
| <i>g-DSF-15-1</i>  | <i>Glyma15g03770</i> | 2                      | 4.4   | 0.01 | 3.2   |                                                                                     |                 | ⑩     |
| <i>g-DSF-15-2</i>  | <i>Glyma15g08420</i> | 2                      | 10.1  | 0.08 | 26.1  |                                                                                     | √               | ③/⑧   |
| <i>g-DSF-15-3</i>  | <i>Glyma15g17910</i> | 2                      | 2.7   | 0.01 | 3.4   | <i>Fflr 12-3</i>                                                                    | √               | ⑩     |
| <i>g-DSF-15-4</i>  | <i>Glyma15g18280</i> | 3                      | 15.4  | 0.2  | 61.8  |                                                                                     |                 | ⑩     |
| <i>g-DSF-15-5</i>  | <i>Glyma15g34840</i> | 3                      | 45.3  | 3.05 | 307.7 | 0.19 54                                                                             |                 | ②/⑧   |
| <i>g-DSF-15-6</i>  | <i>Glyma15g40860</i> | 2                      | 23    | 0.33 | 99.2  |                                                                                     |                 | ③     |
| <i>g-DSF-16-1</i>  | <i>Glyma16g01590</i> | 3                      | 21.3  | 0.45 | 130   | <i>LHY1a(335.6Kb)</i>                                                               |                 | ⑥/⑧   |
| <i>g-DSF-16-2</i>  | <i>Glyma16g03320</i> | 2                      | 38    | 2.24 | 307.7 | <i>GmFT5a(1280.3Kb),</i><br><i>LHY1a(1306.3Kb),GmFT</i><br><i>3a(1307.0Kb)</i>      |                 | ①/③/⑧ |
| <i>g-DSF-16-3</i>  | <i>Glyma16g06061</i> | 2                      | 2.1   | 0.01 | 2.8   |                                                                                     |                 | ⑩     |
| <i>g-DSF-16-4</i>  | <i>Glyma16g26260</i> | 2                      | 4.1   | 0.02 | 8     | <i>E9(FT2A,343.7Kb),</i><br><i>FT2B(382.5Kb),Fflr 9-3</i>                           |                 | ⑤     |
| <i>g-DSF-16-5</i>  | <i>Glyma16g28910</i> | 4                      | 5.3   | 0.01 | 1.6   |                                                                                     |                 | ⑥     |
| <i>g-DSF-16-6</i>  | <i>Glyma16g33881</i> | 2                      | 20.4  | 0.36 | 106.2 | <i>Fflr 13-8</i>                                                                    |                 | ⑧     |
| <i>g-DSF-17-1</i>  | <i>Glyma17g02580</i> | 2                      | 4.1   | 0.01 | 2.2   |                                                                                     | √               | ①/⑧   |
| <i>g-DSF-17-2</i>  | <i>Glyma17g03020</i> | 3                      | 15.7  | 0.17 | 53.3  |                                                                                     | √               | ①/⑧   |
| <i>g-DSF-17-3</i>  | <i>Glyma17g03700</i> | 3                      | 15.2  | 0.21 | 63.8  |                                                                                     | √               | ①/⑦/⑧ |
| <i>g-DSF-17-4</i>  | <i>Glyma17g08460</i> | 2                      | 78.2  | 6.95 | 307.7 | 1.01 258.3                                                                          | √               | ⑩     |
| <i>g-DSF-17-5</i>  | <i>Glyma17g08761</i> | 3                      | 2.8   | 0.01 | 1.9   |                                                                                     | √               | ⑤/①   |
| <i>g-DSF-17-6</i>  | <i>Glyma17g09500</i> | 3                      | 42.2  | 2.26 | 307.7 | 0.34 96.1                                                                           | √               | ⑩     |
| <i>g-DSF-17-7</i>  | <i>Glyma17g13030</i> | 2                      | 2.9   | 0.01 | 2.6   |                                                                                     |                 | ⑩     |
| <i>g-DSF-17-8</i>  | <i>Glyma17g13151</i> | 2                      | 13.2  | 0.15 | 47.2  |                                                                                     |                 | ⑧     |
| <i>g-DSF-17-9</i>  | <i>Glyma17g13260</i> | 2                      | 4.8   | 0.02 | 8.1   |                                                                                     |                 | ⑤     |
| <i>g-DSF-17-10</i> | <i>Glyma17g18472</i> | 2                      | 2.5   | 0.02 | 5.7   |                                                                                     |                 | ⑩     |
| <i>g-DSF-18-1</i>  | <i>Glyma18g07900</i> | 4                      | 5.1   | 0.02 | 4.8   | <i>Fflr 9-2</i>                                                                     |                 | ⑥     |
| <i>g-DSF-18-2</i>  | <i>Glyma18g08410</i> | 5                      | 39.4  | 1.74 | 307.7 | <i>Fflr 9-2</i>                                                                     |                 | ⑥     |
| <i>g-DSF-18-3</i>  | <i>Glyma18g10975</i> | 5                      | 13.8  | 0.13 | 38.2  |                                                                                     | √               | ⑩     |
| <i>g-DSF-18-4</i>  | <i>Glyma18g17395</i> | 4                      | 35.7  | 1.55 | 307.7 | 0.25 69.7                                                                           |                 | ⑧     |
| <i>g-DSF-18-5</i>  | <i>Glyma18g17515</i> | 3                      | 3.3   | 0.02 | 5.1   |                                                                                     |                 | ⑩     |
| <i>g-DSF-18-6</i>  | <i>Glyma18g46220</i> | 4                      | 10.6  | 0.05 | 13.9  | <i>SOC1(477.1kb)</i>                                                                | √               | ⑤/③   |
| <i>g-DSF-18-7</i>  | <i>Glyma18g50725</i> | 3                      | 10.9  | 0.05 | 17.4  |                                                                                     |                 | ⑩     |
| <i>g-DSF-19-1</i>  | <i>Glyma19g32600</i> | 3                      | 13.6  | 0.23 | 70.7  | <i>Fflr 2-3,4-3,15-2</i>                                                            |                 | ⑤/②/① |
| <i>g-DSF-19-2</i>  | <i>Glyma19g33000</i> | 3                      | 18.8  | 0.28 | 84    | <i>Fflr 2-3,4-3,15-2</i>                                                            |                 | ⑧     |
| <i>g-DSF-19-3</i>  | <i>Glyma19g35130</i> | 2                      | 1.7   | 0.01 | 2.5   | <i>Fflr 2-3,4-3,24-3,25-4</i>                                                       |                 | ⑥     |
| <i>g-DSF-19-4</i>  | <i>Glyma19g42710</i> | 2                      | 7.1   | 0.04 | 13.8  | <i>E3(GmphyA3,1084.2Kb),</i><br><i>LHY2a(1667.9Kb),Fflr 5-</i><br><i>3,8-3,20-2</i> |                 | ⑥     |
| <i>g-DSF-20-1</i>  | <i>Glyma20g08091</i> | 4                      | 7.2   | 0.04 | 11.8  | <i>Fflr 16-3,20-3</i>                                                               | √               | ⑥     |
| <i>g-DSF-20-2</i>  | <i>Glyma20g18724</i> | 4                      | 29.8  | 0.81 | 214.6 | <i>Fflr 16-3,20-3,25-3</i>                                                          |                 | ⑩     |
| <i>g-DSF-20-3</i>  | <i>Glyma20g25790</i> | 4                      | 19.7  | 0.25 | 72.9  | <i>Fflr 25-3</i>                                                                    | √               | ⑨     |
| <i>g-DSF-20-4</i>  | <i>Glyma20g33235</i> | 2                      | 28.8  | 0.68 | 188   |                                                                                     |                 | ⑩     |
| <i>g-DSF-20-5</i>  | <i>Glyma20g33361</i> | 2                      | 2.4   | 0.01 | 3.1   |                                                                                     |                 | ⑦     |
| <i>g-DSF-20-6</i>  | <i>Glyma20g37960</i> | 2                      | 5.5   | 0.04 | 15.3  |                                                                                     | √               | ⑧     |
| <i>g-DSF-20-7</i>  | <i>Glyma20g38570</i> | 3                      | 7.4   | 0.02 | 5.6   |                                                                                     | √               | ②/⑦   |
| Total              | 141                  | <sup>a</sup> 406(2.88) | 76.85 |      | 4.05  | <sup>b</sup> 63(44)                                                                 | <sup>c</sup> 39 | 176   |

Note: Gene code: for example, *g-DSF-01-1*, where *DSF* means days from sowing-to-flowering, -01 represents chromosome 1, and -1 represents its order on the chromosome according to its physical position. The position corresponds to the Williams 82 reference genome version 1 (Wm82.a1). DSF: days from sowing-to-flowering; Main-effect: main-effect gene; Gene×Env.: gene interaction with environment.

$R^2$ : genetic contribution of a GASM/gene.



Model *P*: the model-based joint probability value in RTM-GWAS (using a threshold of  $p \leq 0.05$  or  $-\log_{10}P \geq 1.3$ );  
 Reported genes/QTLs: the mapped QTLs in this study are consistent with previously reported genes/QTLs in SoyBase (<http://www.soybase.org>); the QTL name is simplified; for example, *Fflr 8-1* represents first flower *8-1*.  
 Gene group: Gene Ontology groups (please see the notes of Table S2 for details).

<sup>a</sup>: The number before the parentheses represents the number of total alleles, and the number in the parentheses represents the average number of alleles per gene. The same applies below.

<sup>b</sup>: The number before the parentheses represents the number of QTLs/genotypes previously reported, and the number in the parentheses represents the number of loci with reported genes or QTLs. The same applies below.

<sup>c</sup>: “√” indicates that the gene overlaps or is near the QTL discovered in Liu et al. (2021). The same applies below.

**Table S3** The gene–allele system conferring DFM identified from GASM-RTM-GWAS in the WSGP.

| Gene Code         | Genes                | Allele no. | Model P<br>-lg(P) | Main-effect |        | Gene×Env. |        | Known Genes/QTLs       | Reported in Liu's Literature | Gene group |
|-------------------|----------------------|------------|-------------------|-------------|--------|-----------|--------|------------------------|------------------------------|------------|
|                   |                      |            |                   | R2          | -lg(P) | R2        | -lg(P) |                        |                              |            |
| <i>g-DFM-01-1</i> | <i>Glyma01g02780</i> | 2          | 14.1              | 0.39        | 53.5   |           |        |                        | √                            | ⑧          |
| <i>g-DFM-02-1</i> | <i>Glyma02g00371</i> | 4          | 77.5              | 2.66        | 287.0  | 7.36      | 307.7  |                        |                              | ⑧          |
| <i>g-DFM-02-2</i> | <i>Glyma02g03670</i> | 2          | 4.9               | 0.01        | 1.8    |           |        |                        |                              | ①/ ⑧/⑨     |
| <i>g-DFM-02-3</i> | <i>Glyma02g07270</i> | 3          | 14.2              | 0.35        | 46.9   |           |        |                        |                              | ④/②        |
| <i>g-DFM-02-4</i> | <i>Glyma02g40650</i> | 2          | 4.2               | 0.01        | 2.5    |           |        |                        |                              | ⑤/①/⑦      |
| <i>g-DFM-02-5</i> | <i>Glyma02g41040</i> | 3          | 10.0              | 0.11        | 14.8   |           |        |                        |                              | ⑦          |
| <i>g-DFM-03-1</i> | <i>Glyma03g02940</i> | 6          | 8.6               | 0.08        | 9.7    |           |        |                        |                              | ⑩          |
| <i>g-DFM-03-2</i> | <i>Glyma03g06483</i> | 3          | 25.0              | 1.09        | 135.4  |           |        |                        |                              | ④/⑦/⑥      |
| <i>g-DFM-03-3</i> | <i>Glyma03g24890</i> | 2          | 23.5              | 1.19        | 148.1  |           |        |                        |                              | ⑩          |
| <i>g-DFM-03-4</i> | <i>Glyma03g25145</i> | 4          | 12.8              | 0.19        | 25.5   |           |        |                        |                              | ①/⑥        |
| <i>g-DFM-03-5</i> | <i>Glyma03g39870</i> | 3          | 8.1               | 0.06        | 8.3    |           |        |                        |                              | ⑩          |
| <i>g-DFM-03-6</i> | <i>Glyma03g41200</i> | 3          | 13.5              | 0.11        | 14.7   |           |        |                        |                              | ⑧          |
| <i>g-DFM-04-1</i> | <i>Glyma04g02330</i> | 4          | 10.0              | 0.14        | 18.0   |           |        |                        | √                            | ①          |
| <i>g-DFM-04-2</i> | <i>Glyma04g04810</i> | 3          | 5.8               | 0.04        | 5.9    |           |        | <i>J</i> (448.9Kb)     |                              | ⑥          |
| <i>g-DFM-04-3</i> | <i>Glyma04g06940</i> | 2          | 10.6              | 0.18        | 26.1   |           |        |                        |                              | ⑩          |
| <i>g-DFM-04-4</i> | <i>Glyma04g10451</i> | 3          | 13.6              | 0.12        | 16.9   |           |        | <i>CRY1a</i> (559.9Kb) |                              | ⑥          |
| <i>g-DFM-04-5</i> | <i>Glyma04g13142</i> | 3          | 16.7              | 0.78        | 100.3  |           |        |                        |                              | ⑩          |
| <i>g-DFM-04-6</i> | <i>Glyma04g37000</i> | 2          | 16.1              | 0.33        | 45.6   |           |        |                        |                              | ⑦          |
| <i>g-DFM-05-1</i> | <i>Glyma05g02130</i> | 2          | 7.3               | 0.05        | 7.9    |           |        |                        |                              | ⑧/⑨        |
| <i>g-DFM-05-2</i> | <i>Glyma05g04330</i> | 3          | 2.8               | 0.02        | 2.4    |           |        |                        |                              | ⑩          |
| <i>g-DFM-05-3</i> | <i>Glyma05g08670</i> | 3          | 23.6              | 0.81        | 103.6  |           |        |                        | √                            | ⑩          |
| <i>g-DFM-05-4</i> | <i>Glyma05g09170</i> | 2          | 8.1               | 0.04        | 6.7    |           |        |                        | √                            | ⑩          |
| <i>g-DFM-05-5</i> | <i>Glyma05g23000</i> | 3          | 10.0              | 0.11        | 15.3   |           |        |                        |                              | ⑩          |
| <i>g-DFM-05-6</i> | <i>Glyma05g26620</i> | 2          | 6.0               | 0.05        | 7.4    |           |        |                        |                              | ④/⑧        |
| <i>g-DFM-05-7</i> | <i>Glyma05g29200</i> | 2          | 8.0               | 0.08        | 12.1   |           |        | <i>FLC</i> (848.7Kb)   |                              | ③/⑦/⑧      |
| <i>g-DFM-05-8</i> | <i>Glyma05g38075</i> | 3          | 18.7              | 0.94        | 118.4  |           |        |                        |                              | ⑩          |
| <i>g-DFM-06-1</i> | <i>Glyma0006s50</i>  | 2          | 1.7               | 0.01        | 2.2    |           |        |                        |                              | ④/⑦        |
| <i>g-DFM-06-2</i> | <i>Glyma06g05870</i> | 3          | 29.9              | 1.05        | 130.9  | 1.34      | 158.2  |                        |                              | ⑩          |
| <i>g-DFM-06-3</i> | <i>Glyma06g18216</i> | 4          | 14.8              | 0.55        | 70.8   |           |        |                        |                              | ④/①        |
| <i>g-DFM-06-4</i> | <i>Glyma06g40670</i> | 4          | 14.1              | 0.49        | 63.6   |           |        |                        |                              | ⑧          |

|                    |                      |   |      |      |       |      |                                |   |         |
|--------------------|----------------------|---|------|------|-------|------|--------------------------------|---|---------|
| <i>g-DFM-06-5</i>  | <i>Glyma06g45450</i> | 4 | 20.1 | 0.72 | 92.1  |      |                                | √ | ⑦       |
| <i>g-DFM-06-6</i>  | <i>Glyma06g46150</i> | 3 | 16.5 | 0.65 | 84.6  |      |                                | √ | ⑥       |
| <i>g-DFM-06-7</i>  | <i>Glyma06g48150</i> | 3 | 23.8 | 0.61 | 79.0  |      |                                | √ | ⑤       |
| <i>g-DFM-07-1</i>  | <i>Glyma07g03005</i> | 2 | 7.9  | 0.1  | 15.4  |      | <i>Rsl 2-1</i>                 |   | ⑩       |
| <i>g-DFM-07-2</i>  | <i>Glyma07g07600</i> | 2 | 4.3  | 0.01 | 1.3   |      | <i>Rsl 5-4</i>                 | √ | ⑧       |
| <i>g-DFM-07-3</i>  | <i>Glyma07g09420</i> | 5 | 22.1 | 1.44 | 170.6 |      |                                |   | ⑧       |
| <i>g-DFM-07-4</i>  | <i>Glyma07g09860</i> | 2 | 3.5  | 0.01 | 1.8   |      |                                |   | ⑧       |
| <i>g-DFM-07-5</i>  | <i>Glyma07g18060</i> | 2 | 5.1  | 0.05 | 7.4   |      |                                |   | ⑤/⑧     |
| <i>g-DFM-07-6</i>  | <i>Glyma07g33880</i> | 2 | 3.5  | 0.03 | 5.5   |      |                                |   | ⑦       |
| <i>g-DFM-07-7</i>  | <i>Glyma07g37580</i> | 2 | 23.4 | 0.98 | 124.7 |      |                                | √ | ⑩       |
| <i>g-DFM-07-8</i>  | <i>Glyma07g40260</i> | 2 | 22.5 | 0.69 | 90.4  |      |                                | √ | ⑩       |
| <i>g-DFM-08-1</i>  | <i>Glyma08g04620</i> | 2 | 3.9  | 0.05 | 7.7   |      |                                | √ | ⑤/⑧     |
| <i>g-DFM-08-2</i>  | <i>Glyma08g10960</i> | 2 | 2.6  | 0.02 | 3.4   |      |                                |   | ⑩       |
| <i>g-DFM-08-3</i>  | <i>Glyma08g15250</i> | 3 | 17.1 | 0.66 | 85.3  |      |                                |   | ⑥       |
| <i>g-DFM-08-4</i>  | <i>Glyma08g15870</i> | 2 | 28.1 | 1.21 | 150.0 |      |                                |   | ⑩       |
| <i>g-DFM-08-5</i>  | <i>Glyma08g19780</i> | 2 | 5.0  | 0.01 | 1.6   |      |                                |   | ⑩       |
| <i>g-DFM-08-6</i>  | <i>Glyma08g20625</i> | 2 | 13.2 | 0.28 | 39.2  |      | <i>Rp 1-5</i>                  |   | ⑧       |
| <i>g-DFM-08-7</i>  | <i>Glyma08g23480</i> | 2 | 18.1 | 0.73 | 94.9  |      |                                |   | ⑨       |
| <i>g-DFM-08-8</i>  | <i>Glyma08g28765</i> | 2 | 2.7  | 0.01 | 2.4   |      | <i>COL2a(495.7Kb)</i>          |   | ⑩       |
| <i>g-DFM-08-9</i>  | <i>Glyma08g40530</i> | 2 | 16.0 | 0.29 | 40.9  |      |                                |   | ⑥       |
| <i>g-DFM-08-10</i> | <i>Glyma08g47790</i> | 3 | 7.8  | 0.09 | 12.0  |      | <i>E10(11.4Kb),FT6(871.7K)</i> |   | ⑨       |
| <i>g-DFM-09-1</i>  | <i>Glyma09g14100</i> | 2 | 5.7  | 0.03 | 4.7   |      |                                |   | ④/⑤/①   |
| <i>g-DFM-09-2</i>  | <i>Glyma09g16566</i> | 2 | 20.1 | 0.34 | 47.4  |      |                                | √ | ①       |
| <i>g-DFM-09-3</i>  | <i>Glyma09g37840</i> | 3 | 4.1  | 0.04 | 4.9   |      |                                | √ | ⑦/⑧     |
| <i>g-DFM-09-4</i>  | <i>Glyma09g40420</i> | 2 | 30.7 | 2.02 | 232.3 |      |                                | √ | ⑩       |
| <i>g-DFM-10-1</i>  | <i>Glyma10g05240</i> | 2 | 3.7  | 0.04 | 6.0   |      |                                |   | ⑩       |
| <i>g-DFM-10-2</i>  | <i>Glyma10g26450</i> | 5 | 7.0  | 0.09 | 10.5  |      |                                |   | ④/⑤/②/③ |
| <i>g-DFM-10-3</i>  | <i>Glyma10g29970</i> | 4 | 17.9 | 0.76 | 95.8  |      | <i>PhyA1(1707.7Kb)</i>         | √ | ①/⑥     |
| <i>g-DFM-10-4</i>  | <i>Glyma10g31630</i> | 2 | 43.6 | 1.91 | 222.0 | 2.2  | 246.0                          | √ | ⑧       |
| <i>g-DFM-10-5</i>  | <i>Glyma10g41880</i> | 2 | 1.3  | 0.01 | 1.3   |      |                                |   | ⑧       |
| <i>g-DFM-11-1</i>  | <i>Glyma11g07620</i> | 4 | 24.5 | 0.66 | 84.7  |      |                                |   | ⑦       |
| <i>g-DFM-11-2</i>  | <i>Glyma11g10800</i> | 4 | 8.9  | 0.15 | 19.7  |      |                                |   | ⑩       |
| <i>g-DFM-11-3</i>  | <i>Glyma11g13111</i> | 2 | 3.5  | 0.01 | 1.4   |      |                                | √ | ⑩       |
| <i>g-DFM-11-4</i>  | <i>Glyma11g14300</i> | 2 | 3.5  | 0.02 | 2.8   |      |                                | √ | ⑩       |
| <i>g-DFM-11-5</i>  | <i>Glyma11g19735</i> | 2 | 17.0 | 0.54 | 72.6  |      | <i>Rsl 8-1</i>                 | √ | ⑩       |
| <i>g-DFM-11-6</i>  | <i>Glyma11g37040</i> | 2 | 1.8  | 0.01 | 2.3   |      | <i>ELF4A(1308.9Kb)</i>         |   | ⑩       |
| <i>g-DFM-12-1</i>  | <i>Glyma12g03580</i> | 3 | 12.2 | 0.24 | 32.5  |      |                                |   | ⑥       |
| <i>g-DFM-12-2</i>  | <i>Glyma12g06580</i> | 3 | 18.1 | 0.77 | 98.4  |      |                                |   | ⑧       |
| <i>g-DFM-12-3</i>  | <i>Glyma12g06620</i> | 2 | 14.0 | 0.21 | 29.8  |      |                                |   | ⑧       |
| <i>g-DFM-12-4</i>  | <i>Glyma12g06950</i> | 2 | 12.2 | 0.06 | 8.9   |      |                                |   | ①       |
| <i>g-DFM-12-5</i>  | <i>Glyma12g08860</i> | 2 | 2.1  | 0.02 | 2.9   |      | <i>Rsl 7-3</i>                 |   | ①       |
| <i>g-DFM-12-6</i>  | <i>Glyma12g14508</i> | 3 | 1.9  | 0.02 | 2.7   |      |                                | √ | ⑧       |
| <i>g-DFM-12-7</i>  | <i>Glyma12g14530</i> | 2 | 3.3  | 0.01 | 2.2   |      |                                | √ | ⑥       |
| <i>g-DFM-12-8</i>  | <i>Glyma12g33700</i> | 2 | 13.2 | 0.27 | 38.1  |      |                                |   | ⑩       |
| <i>g-DFM-12-9</i>  | <i>Glyma12g33940</i> | 2 | 15.4 | 0.43 | 58.3  |      |                                |   | ⑩       |
| <i>g-DFM-13-1</i>  | <i>Glyma13g06400</i> | 4 | 5.3  | 0.04 | 4.6   |      |                                |   | ⑩       |
| <i>g-DFM-13-2</i>  | <i>Glyma13g08035</i> | 3 | 16.9 | 0.3  | 40.4  |      |                                |   | ⑩       |
| <i>g-DFM-13-3</i>  | <i>Glyma13g09470</i> | 5 | 54.3 | 1.25 | 150.7 | 5.09 | 307.7                          |   | ⑩       |
| <i>g-DFM-13-4</i>  | <i>Glyma13g09970</i> | 6 | 15.1 | 0.52 | 65.1  |      |                                |   | ⑩       |
| <i>g-DFM-13-5</i>  | <i>Glyma13g16940</i> | 3 | 13.6 | 0.25 | 33.3  |      |                                |   | ⑦       |
| <i>g-DFM-13-6</i>  | <i>Glyma13g21340</i> | 3 | 8.0  | 0.06 | 8.6   |      |                                |   | ⑧       |

|                    |                      |   |      |         |       |      |       |                              |   |  |     |
|--------------------|----------------------|---|------|---------|-------|------|-------|------------------------------|---|--|-----|
| <i>g-DFM-13-7</i>  | <i>Glyma13g22870</i> | 3 | 10.1 | 0.02    | 2.6   |      |       |                              |   |  | ⑩   |
| <i>g-DFM-13-8</i>  | <i>Glyma13g25480</i> | 6 | 42.0 | 2.59    | 278.7 | 2.12 | 226.2 | <i>Rsl 7-2</i>               | √ |  | ④   |
| <i>g-DFM-13-9</i>  | <i>Glyma13g26270</i> | 4 | 10.3 | 0.14    | 17.7  |      |       |                              | √ |  | ⑧   |
| <i>g-DFM-13-10</i> | <i>Glyma13g28280</i> | 4 | 16.3 | 0.76    | 95.9  |      |       |                              | √ |  | ⑧   |
| <i>g-DFM-13-11</i> | <i>Glyma13g28570</i> | 2 | 8.9  | 0.01    | 1.9   |      |       |                              |   |  | ⑧   |
| <i>g-DFM-13-12</i> | <i>Glyma13g28880</i> | 4 | 10.2 | 0.17    | 22.4  |      |       |                              |   |  | ⑤   |
| <i>g-DFM-13-13</i> | <i>Glyma13g38860</i> | 2 | 8.6  | 0.14    | 20.4  |      |       |                              |   |  | ⑧   |
| <i>g-DFM-13-14</i> | <i>Glyma13g43710</i> | 2 | 12.7 | 0.12    | 17.0  |      |       |                              |   |  | ⑩   |
| <i>g-DFM-13-15</i> | <i>Glyma13g43740</i> | 3 | 26.5 | 1.59    | 188.7 |      |       |                              |   |  | ④/⑤ |
| <i>g-DFM-14-1</i>  | <i>Glyma14g02790</i> | 4 | 18.5 | 0.46    | 60.1  |      |       |                              |   |  | ⑥   |
| <i>g-DFM-14-2</i>  | <i>Glyma14g05780</i> | 3 | 13.2 | 0.27    | 36.2  |      |       |                              | √ |  | ⑩   |
| <i>g-DFM-14-3</i>  | <i>Glyma14g07960</i> | 2 | 9.1  | 0.06    | 8.6   |      |       |                              |   |  | ⑧   |
| <i>g-DFM-14-4</i>  | <i>Glyma14g10790</i> | 2 | 8.6  | 0.11    | 15.8  |      |       |                              |   |  | ⑧   |
| <i>g-DFM-14-5</i>  | <i>Glyma14g16655</i> | 2 | 11.6 | 0.12    | 17.2  |      |       |                              |   |  | ⑩   |
| <i>g-DFM-14-6</i>  | <i>Glyma14g38670</i> | 3 | 4.3  | 0.02    | 2.4   |      |       |                              | √ |  | ⑧   |
| <i>g-DFM-15-1</i>  | <i>Glyma15g17710</i> | 2 | 10.4 | 0.09    | 13.8  |      |       |                              |   |  | ⑧   |
| <i>g-DFM-15-2</i>  | <i>Glyma15g21101</i> | 5 | 7.2  | 9.0E-05 | 5.2   |      |       |                              |   |  | ⑦   |
| <i>g-DFM-15-3</i>  | <i>Glyma15g21400</i> | 2 | 16.9 | 0.43    | 58.4  |      |       |                              |   |  | ⑩   |
| <i>g-DFM-15-4</i>  | <i>Glyma15g40740</i> | 4 | 11.5 | 0.07    | 8.6   |      |       |                              |   |  | ⑧   |
| <i>g-DFM-15-5</i>  | <i>Glyma15g42762</i> | 4 | 8.4  | 0.09    | 12.0  |      |       |                              |   |  | ⑩   |
| <i>g-DFM-16-1</i>  | <i>Glyma16g01570</i> | 2 | 6.1  | 0.02    | 4.2   |      |       |                              | √ |  | ⑩   |
| <i>g-DFM-16-2</i>  | <i>Glyma16g01640</i> | 2 | 7.7  | 0.06    | 8.8   |      |       | <i>FT5A(2903.4Kb),FT3A(2</i> | √ |  | ①   |
| <i>g-DFM-16-3</i>  | <i>Glyma16g25500</i> | 2 | 32.8 | 2.12    | 241.7 |      |       | <i>E9(1225.6Kb),FT2B(126</i> |   |  | ⑩   |
| <i>g-DFM-16-4</i>  | <i>Glyma16g28010</i> | 6 | 4.0  | 0.06    | 5.9   |      |       |                              | √ |  | ⑩   |
| <i>g-DFM-16-5</i>  | <i>Glyma16g33320</i> | 4 | 11.4 | 0.19    | 25.2  |      |       | <i>TFLI.3(998.3Kb)</i>       |   |  | ①   |
| <i>g-DFM-17-1</i>  | <i>Glyma17g04661</i> | 2 | 13.5 | 0.17    | 24.5  |      |       |                              | √ |  | ⑩   |
| <i>g-DFM-17-2</i>  | <i>Glyma17g14370</i> | 2 | 2.5  | 0.01    | 2.4   |      |       | <i>GmYABBY16(318.8Kb)</i>    |   |  | ⑤   |
| <i>g-DFM-17-3</i>  | <i>Glyma17g19660</i> | 3 | 3.2  | 0.03    | 4.2   |      |       |                              |   |  | ⑧   |
| <i>g-DFM-17-4</i>  | <i>Glyma17g20310</i> | 3 | 12.8 | 0.1     | 14.2  |      |       | <i>Rp1-7</i>                 |   |  | ⑩   |
| <i>g-DFM-17-5</i>  | <i>Glyma17g34321</i> | 4 | 7.1  | 1.6E-04 | 10.0  |      |       |                              | √ |  | ⑧   |
| <i>g-DFM-18-1</i>  | <i>Glyma18g01330</i> | 2 | 3.1  | 0.01    | 2.5   |      |       | <i>ELF4B(1368.1Kb)</i>       | √ |  | ③/⑨ |
| <i>g-DFM-18-2</i>  | <i>Glyma18g05730</i> | 2 | 6.0  | 0.05    | 8.0   |      |       |                              |   |  | ⑧   |
| <i>g-DFM-18-3</i>  | <i>Glyma18g06250</i> | 2 | 8.2  | 0.01    | 1.4   |      |       |                              |   |  | ⑩   |
| <i>g-DFM-18-4</i>  | <i>Glyma18g13175</i> | 2 | 2.6  | 0.02    | 2.7   |      |       |                              |   |  | ⑩   |
| <i>g-DFM-18-5</i>  | <i>Glyma18g16780</i> | 2 | 5.0  | 0.02    | 3.6   |      |       |                              |   |  | ⑥   |
| <i>g-DFM-18-6</i>  | <i>Glyma18g18220</i> | 3 | 13.5 | 0.2     | 27.0  |      |       |                              |   |  | ⑩   |
| <i>g-DFM-18-7</i>  | <i>Glyma18g20146</i> | 5 | 18.3 | 0.88    | 109.7 |      |       |                              | √ |  | ⑩   |
| <i>g-DFM-18-8</i>  | <i>Glyma18g53823</i> | 5 | 12.1 | 0.1     | 12.3  |      |       | <i>FT1B(116Kb),FT1A(129.</i> |   |  | ④/⑥ |
| <i>g-DFM-19-1</i>  | <i>Glyma19g01536</i> | 2 | 8.0  | 1.1E-03 | 1.5   |      |       |                              | √ |  | ⑩   |
| <i>g-DFM-19-2</i>  | <i>Glyma19g03563</i> | 3 | 4.3  | 0.03    | 3.7   |      |       |                              |   |  | ①   |
| <i>g-DFM-19-3</i>  | <i>Glyma19g23740</i> | 2 | 21.9 | 1.1     | 138.5 |      |       |                              |   |  | ⑩   |
| <i>g-DFM-19-4</i>  | <i>Glyma19g25980</i> | 3 | 16.1 | 0.3     | 39.9  |      |       |                              |   |  | ⑩   |
| <i>g-DFM-19-5</i>  | <i>Glyma19g26950</i> | 4 | 10.9 | 0.07    | 8.5   |      |       | <i>FT3B(1722.5Kb),FT5B(1</i> |   |  | ⑤/⑧ |
| <i>g-DFM-19-6</i>  | <i>Glyma19g30690</i> | 3 | 70.5 | 7.2     | 307.7 |      |       | <i>741.0Kb)</i>              |   |  | ⑩   |
| <i>g-DFM-19-7</i>  | <i>Glyma19g33210</i> | 3 | 11.0 | 0.05    | 6.7   |      |       |                              |   |  | ⑥   |
| <i>g-DFM-19-8</i>  | <i>Glyma19g33760</i> | 3 | 9.2  | 0.07    | 9.4   |      |       |                              |   |  | ⑩   |
| <i>g-DFM-19-9</i>  | <i>Glyma19g34740</i> | 2 | 35.9 | 2.31    | 259.5 |      |       | <i>DT1(TFL1b,2633.3Kb),R</i> |   |  | ⑤/⑧ |
| <i>g-DFM-19-10</i> | <i>Glyma19g45170</i> | 2 | 6.2  | 0.02    | 3.5   |      |       | <i>Rsl 3-3</i>               |   |  | ⑩   |
| <i>g-DFM-19-11</i> | <i>Glyma19g45260</i> | 3 | 15.9 | 0.39    | 52.6  |      |       |                              |   |  | ⑥   |

|                   |                      |           |      |       |       |                            |    |     |
|-------------------|----------------------|-----------|------|-------|-------|----------------------------|----|-----|
| <i>g-DFM-20-1</i> | <i>Glyma20g03100</i> | 5         | 15.0 | 0.24  | 30.8  |                            |    | ⑩   |
| <i>g-DFM-20-2</i> | <i>Glyma20g26640</i> | 2         | 8.0  | 0.07  | 10.9  |                            |    | ⑩   |
| <i>g-DFM-20-3</i> | <i>Glyma20g27700</i> | 2         | 17.5 | 0.07  | 10.1  | <i>GIGANTEA</i> (2838.9Kb) |    | ⑥/⑧ |
| <i>g-DFM-20-4</i> | <i>Glyma20g34910</i> | 2         | 2.9  | 0.01  | 2.2   |                            |    | ①   |
| <i>g-DFM-20-5</i> | <i>Glyma20g35670</i> | 4         | 4.4  | 0.05  | 5.9   |                            |    | ⑤   |
| Total             | 135                  | 384(2.84) |      | 55.05 | 18.11 | 28(23)                     | 34 | 99  |

Note: Gene code: for example, *g-DFM-01-1*, where *DFM* means days from flowering-to-maturity, -01 represents chromosome 1, and -1 represents its order on the chromosome according to its physical position. The position corresponds to the Williams 82 reference genome version 1 (Wm82.a1). Reported QTL, the QTL name is simplified; for example, *Rpl-3* represents reproductive period 1-3 and *Rsl7-1* represents reproductive stage length 7-1. The same applies below. Gene group: Gene Ontology groups (please see the notes of Table S2 for details).

**Table S4** The gene–allele system conferring  $ADL_{DSF}$  identified from GASM-RTM-GWAS in the WSGP.

| Gene Code                       | Genes                | Allele no. | Model P | Main-effect |       | Gene×Env. |        | Known Genes/QTLs                     | Gene group |
|---------------------------------|----------------------|------------|---------|-------------|-------|-----------|--------|--------------------------------------|------------|
|                                 |                      |            |         | $R^2$       | -     | $R^2$     | -lg(P) |                                      |            |
| <i>g-ADL<sub>DSF</sub>-01-1</i> | <i>Glyma01g01950</i> | 2          | 18.6    | 0.24        | 87.3  |           |        |                                      | ⑩          |
| <i>g-ADL<sub>DSF</sub>-01-2</i> | <i>Glyma01g04100</i> | 2          | 15.1    | 0.18        | 67.1  |           |        |                                      | ⑨          |
| <i>g-ADL<sub>DSF</sub>-01-3</i> | <i>Glyma01g22830</i> | 2          | 61.0    | 2.9         | 307.7 | 1.86      | 307.7  | <i>Fflr 16-1</i>                     | ⑤          |
| <i>g-ADL<sub>DSF</sub>-01-4</i> | <i>Glyma01g40930</i> | 2          | 3.8     | 3.8E-03     | 2     |           |        |                                      | ⑥          |
| <i>g-ADL<sub>DSF</sub>-02-1</i> | <i>Glyma02g00371</i> | 4          | 31.4    | 1.27        | 307.7 |           |        |                                      | ⑧          |
| <i>g-ADL<sub>DSF</sub>-02-2</i> | <i>Glyma02g04190</i> | 3          | 33.1    | 1.39        | 307.7 |           |        |                                      | ⑤/⑧        |
| <i>g-ADL<sub>DSF</sub>-02-3</i> | <i>Glyma02g06730</i> | 4          | 29.1    | 1.00        | 290.7 |           |        | <i>GmFT2c</i> (659.9Kb)              | ⑤/①        |
| <i>g-ADL<sub>DSF</sub>-02-4</i> | <i>Glyma02g08620</i> | 3          | 32.0    | 0.75        | 232   |           |        |                                      | ⑩          |
| <i>g-ADL<sub>DSF</sub>-02-5</i> | <i>Glyma02g13165</i> | 5          | 9.9     | 0.06        | 21.3  |           |        | <i>Fflr 16-2</i>                     | ⑩          |
| <i>g-ADL<sub>DSF</sub>-02-6</i> | <i>Glyma02g13655</i> | 2          | 19.7    | 0.28        | 97.6  |           |        | <i>Fflr 16-2</i>                     | ⑧          |
| <i>g-ADL<sub>DSF</sub>-02-7</i> | <i>Glyma02g16560</i> | 2          | 7.3     | 0.01        | 6.2   |           |        | <i>Fflr 16-2</i>                     | ⑩          |
| <i>g-ADL<sub>DSF</sub>-02-8</i> | <i>Glyma02g39495</i> | 3          | 8.7     | 0.01        | 2.4   |           |        | <i>Fflr 15-1</i>                     | ④/⑧        |
| <i>g-ADL<sub>DSF</sub>-02-9</i> | <i>Glyma02g45960</i> | 2          | 23.8    | 0.65        | 207.7 |           |        |                                      | ⑤          |
| <i>g-ADL<sub>DSF</sub>-03-1</i> | <i>Glyma03g02390</i> | 2          | 8.4     | 0.02        | 9.2   |           |        |                                      | ⑥          |
| <i>g-ADL<sub>DSF</sub>-03-2</i> | <i>Glyma03g15870</i> | 2          | 13.3    | 0.06        | 24.5  |           |        |                                      | ⑤          |
| <i>g-ADL<sub>DSF</sub>-03-3</i> | <i>Glyma03g27150</i> | 3          | 14.8    | 0.08        | 31.2  |           |        |                                      | ⑩          |
| <i>g-ADL<sub>DSF</sub>-03-4</i> | <i>Glyma03g27970</i> | 4          | 24.5    | 0.4         | 134.1 |           |        |                                      | ③/⑦        |
| <i>g-ADL<sub>DSF</sub>-03-5</i> | <i>Glyma03g29070</i> | 3          | 20.9    | 0.38        | 129.8 |           |        |                                      | ⑤          |
| <i>g-ADL<sub>DSF</sub>-03-6</i> | <i>Glyma03g33470</i> | 2          | 3.2     | 0.02        | 6.5   |           |        | <i>Dt1</i> ( <i>TFL1A</i> ,1503.6Kb) | ⑤/①        |
| <i>g-ADL<sub>DSF</sub>-03-7</i> | <i>Glyma03g39050</i> | 2          | 29.6    | 1.28        | 307.7 |           |        |                                      | ⑩          |
| <i>g-ADL<sub>DSF</sub>-03-8</i> | <i>Glyma03g41320</i> | 2          | 3.7     | 0.02        | 6.8   |           |        | <i>LHY2b</i> (669.4Kb)               | ⑧          |
| <i>g-ADL<sub>DSF</sub>-04-1</i> | <i>Glyma04g06600</i> | 4          | 36.4    | 2.22        | 307.7 |           |        | <i>J</i> ( <i>GmELF3</i> ,1017.8Kb)  | ⑩          |
| <i>g-ADL<sub>DSF</sub>-04-2</i> | <i>Glyma04g07160</i> | 2          | 12.5    | 0.06        | 21.9  |           |        |                                      | ⑤/⑧        |
| <i>g-ADL<sub>DSF</sub>-04-3</i> | <i>Glyma04g16180</i> | 4          | 10.3    | 0.06        | 19.5  |           |        |                                      | ⑤/②        |
| <i>g-ADL<sub>DSF</sub>-04-4</i> | <i>Glyma04g41390</i> | 2          | 48.1    | 2.82        | 307.7 |           |        | <i>Fflr 22-1</i>                     | ④/⑤/⑥      |
| <i>g-ADL<sub>DSF</sub>-04-5</i> | <i>Glyma04g43550</i> | 2          | 2.3     | 3.0E-03     | 1.7   |           |        |                                      | ⑥          |
| <i>g-ADL<sub>DSF</sub>-05-1</i> | <i>Glyma05g23731</i> | 3          | 26.7    | 1.23        | 307.7 |           |        |                                      | ⑧          |
| <i>g-ADL<sub>DSF</sub>-05-2</i> | <i>Glyma05g26050</i> | 2          | 30.1    | 0.9         | 269.9 |           |        |                                      | ⑩          |
| <i>g-ADL<sub>DSF</sub>-05-3</i> | <i>Glyma05g27870</i> | 2          | 32.1    | 1.32        | 307.7 |           |        | <i>FLC</i> (279.9Kb)                 | ⑥/⑧        |
| <i>g-ADL<sub>DSF</sub>-05-4</i> | <i>Glyma05g29190</i> | 5          | 4.4     | 0.01        | 4     |           |        |                                      | ⑥/⑧        |
| <i>g-ADL<sub>DSF</sub>-05-5</i> | <i>Glyma05g37380</i> | 2          | 2.0     | 0.01        | 3.8   |           |        |                                      | ⑧          |
| <i>g-ADL<sub>DSF</sub>-06-1</i> | <i>Glyma06g10320</i> | 5          | 14.1    | 0.06        | 19.9  |           |        |                                      | ⑦          |
| <i>g-ADL<sub>DSF</sub>-06-2</i> | <i>Glyma06g18580</i> | 2          | 25.1    | 0.69        | 216.8 |           |        |                                      | ①          |

|                                  |                      |   |       |         |            |                                                 |         |
|----------------------------------|----------------------|---|-------|---------|------------|-------------------------------------------------|---------|
| <i>g-ADL<sub>DSF</sub>-06-3</i>  | <i>Glyma06g23580</i> | 4 | 72.5  | 4.24    | 307.7      | (696.3Kb), <i>Fflr 8-1,9-1,10-1,20-1, 22-</i>   | ⑩       |
| <i>g-ADL<sub>DSF</sub>-06-4</i>  | <i>Glyma06g32870</i> | 4 | 13.3  | 0.08    | 28.7       | <i>Fflr 3-1,7-1,8-1,9-1,10-1,18-1,20-1, 22-</i> | ⑩       |
| <i>g-ADL<sub>DSF</sub>-06-5</i>  | <i>Glyma06g43951</i> | 2 | 33.1  | 1.61    | 307.7      | <i>Fflr 1-1,1-2,9-1,10-1</i>                    | ①/⑧     |
| <i>g-ADL<sub>DSF</sub>-06-6</i>  | <i>Glyma06g44630</i> | 2 | 19.2  | 0.37    | 126.6      | <i>Fflr 1-1,1-2,9-1,10-1</i>                    | ⑤       |
| <i>g-ADL<sub>DSF</sub>-07-1</i>  | <i>Glyma07g05290</i> | 2 | 32.0  | 1.65    | 307.7      | <i>LHY1b(127.8Kb)</i>                           | ⑩       |
| <i>g-ADL<sub>DSF</sub>-08-1</i>  | <i>Glyma08g03210</i> | 4 | 67.3  | 6.04    | 307.7      |                                                 | ⑨       |
| <i>g-ADL<sub>DSF</sub>-08-2</i>  | <i>Glyma08g09191</i> | 2 | 20.7  | 0.44    | 149.4      |                                                 | ⑩       |
| <i>g-ADL<sub>DSF</sub>-08-3</i>  | <i>Glyma08g12350</i> | 3 | 6.2   | 0.01    | 3.8        | <i>Fflr 13-1</i>                                | ⑥/⑧     |
| <i>g-ADL<sub>DSF</sub>-08-4</i>  | <i>Glyma08g24630</i> | 3 | 16.2  | 0.24    | 82.9       |                                                 | ⑩       |
| <i>g-ADL<sub>DSF</sub>-08-5</i>  | <i>Glyma08g27633</i> | 4 | 33.1  | 1.78    | 307.7      |                                                 | ⑦       |
| <i>g-ADL<sub>DSF</sub>-08-6</i>  | <i>Glyma08g28920</i> | 3 | 11.6  | 0.08    | 28.5       |                                                 | ⑤/⑦     |
| <i>g-ADL<sub>DSF</sub>-09-1</i>  | <i>Glyma09g21070</i> | 3 | 7.2   | 0.02    | 6          | <i>Fflr 24-2,3-4</i>                            | ⑥       |
| <i>g-ADL<sub>DSF</sub>-09-2</i>  | <i>Glyma09g28620</i> | 4 | 13.7  | 0.07    | 23.5       |                                                 | ⑥       |
| <i>g-ADL<sub>DSF</sub>-09-3</i>  | <i>Glyma09g31087</i> | 2 | 23.0  | 0.37    | 128.1      |                                                 | ⑧       |
| <i>g-ADL<sub>DSF</sub>-09-4</i>  | <i>Glyma09g31880</i> | 2 | 29.5  | 0.8     | 246.6      |                                                 | ⑤/⑦     |
| <i>g-ADL<sub>DSF</sub>-09-5</i>  | <i>Glyma09g34750</i> | 3 | 14.4  | 0.08    | 28.4       |                                                 | ⑦       |
| <i>g-ADL<sub>DSF</sub>-09-6</i>  | <i>Glyma09g35651</i> | 2 | 3.9   | 0.01    | 5.6        |                                                 | ⑩       |
| <i>g-ADL<sub>DSF</sub>-09-7</i>  | <i>Glyma09g36030</i> | 3 | 19.8  | 0.3     | 103        |                                                 | ⑩       |
| <i>g-ADL<sub>DSF</sub>-09-8</i>  | <i>Glyma09g37580</i> | 2 | 3.1   | 0.01    | 2.9        |                                                 | ⑧       |
| <i>g-ADL<sub>DSF</sub>-10-1</i>  | <i>Glyma10g01610</i> | 4 | 14.0  | 0.17    | 61         |                                                 | ②       |
| <i>g-ADL<sub>DSF</sub>-10-2</i>  | <i>Glyma10g04440</i> | 2 | 2.9   | 0.01    | 3.1        |                                                 | ⑩       |
| <i>g-ADL<sub>DSF</sub>-10-3</i>  | <i>Glyma10g14916</i> | 3 | 14.6  | 0.12    | 43.8       | <i>Fflr 13-10</i>                               | ①       |
| <i>g-ADL<sub>DSF</sub>-10-4</i>  | <i>Glyma10g26450</i> | 5 | 17.0  | 0.17    | 59.8       | <i>E4(PhyA,2112.8Kb),Fflr 13-10</i>             | Ⅰ/⑤/②/③ |
| <i>g-ADL<sub>DSF</sub>-10-5</i>  | <i>Glyma10g29970</i> | 4 | 16.1  | 0.38    | 128.6      | <i>E4(PHYA,1707.7Kb)</i>                        | ⑩       |
| <i>g-ADL<sub>DSF</sub>-10-6</i>  | <i>Glyma10g30930</i> | 3 | 34.1  | 2.01    | 307.7      |                                                 | ⑩       |
| <i>g-ADL<sub>DSF</sub>-10-7</i>  | <i>Glyma10g31570</i> | 3 | 2.9   | 0.01    | 3.6        |                                                 | ⑤       |
| <i>g-ADL<sub>DSF</sub>-10-8</i>  | <i>Glyma10g35640</i> | 3 | 15.4  | 0.16    | 57.3       | <i>E2(GmGI,810.9Kb)</i>                         | ⑩       |
| <i>g-ADL<sub>DSF</sub>-10-9</i>  | <i>Glyma10g41573</i> | 2 | 17.8  | 0.24    | 85.7       |                                                 | ⑥       |
| <i>g-ADL<sub>DSF</sub>-10-10</i> | <i>Glyma10g41710</i> | 3 | 30.3  | 0.89    | 266.1      |                                                 | ⑩       |
| <i>g-ADL<sub>DSF</sub>-10-11</i> | <i>Glyma10g44540</i> | 2 | 31.1  | 0.99    | 292        |                                                 | ⑧/⑨     |
| <i>g-ADL<sub>DSF</sub>-11-1</i>  | <i>Glyma11g00600</i> | 3 | 4.0   | 3.5E-03 | 1.3        |                                                 | ⑤       |
| <i>g-ADL<sub>DSF</sub>-11-2</i>  | <i>Glyma11g03130</i> | 2 | 16.3  | 0.14    | 53.2       |                                                 | ⑩       |
| <i>g-ADL<sub>DSF</sub>-11-3</i>  | <i>Glyma11g27510</i> | 3 | 16.2  | 0.11    | 41.7       |                                                 | ⑤       |
| <i>g-ADL<sub>DSF</sub>-11-4</i>  | <i>Glyma11g37010</i> | 4 | 11.0  | 0.02    | 7.9        | <i>ELF4A(1295.5Kb)</i>                          | ⑧       |
| <i>g-ADL<sub>DSF</sub>-11-5</i>  | <i>Glyma11g37040</i> | 2 | 2.2   | 2.9E-03 | 1.6        |                                                 | ⑩       |
| <i>g-ADL<sub>DSF</sub>-12-1</i>  | <i>Glyma12g06580</i> | 3 | 13.2  | 0.08    | 28.7       |                                                 | ⑧       |
| <i>g-ADL<sub>DSF</sub>-12-2</i>  | <i>Glyma12g06620</i> | 2 | 11.1  | 0.09    | 33.4       | <i>PRR3b(993.8Kb)</i>                           | ⑧       |
| <i>g-ADL<sub>DSF</sub>-12-3</i>  | <i>Glyma12g10890</i> | 3 | 6.4   | 0.03    | 10.3       |                                                 | ⑤       |
| <i>g-ADL<sub>DSF</sub>-13-1</i>  | <i>Glyma13g07110</i> | 3 | 119.7 | 5.67    | 307.7      |                                                 | ⑦       |
| <i>g-ADL<sub>DSF</sub>-13-2</i>  | <i>Glyma13g09341</i> | 2 | 48.7  | 2.19    | 307.7 0.45 | 148.8                                           | ⑧       |
| <i>g-ADL<sub>DSF</sub>-13-3</i>  | <i>Glyma13g09380</i> | 7 | 22.2  | 0.49    | 156.1      |                                                 | ⑩       |
| <i>g-ADL<sub>DSF</sub>-13-4</i>  | <i>Glyma13g22420</i> | 2 | 12.6  | 0.13    | 47.3       |                                                 | ④/⑤/①   |
| <i>g-ADL<sub>DSF</sub>-13-5</i>  | <i>Glyma13g23700</i> | 4 | 18.9  | 0.48    | 157.2      |                                                 | ⑤/①     |
| <i>g-ADL<sub>DSF</sub>-13-6</i>  | <i>Glyma13g28260</i> | 3 | 5.5   | 0.02    | 6.3        |                                                 | ⑩       |
| <i>g-ADL<sub>DSF</sub>-13-7</i>  | <i>Glyma13g37360</i> | 3 | 2.8   | 0.01    | 2.6        |                                                 | ⑩       |
| <i>g-ADL<sub>DSF</sub>-13-8</i>  | <i>Glyma13g37980</i> | 5 | 18.6  | 0.3     | 100.4      |                                                 | ⑧       |
| <i>g-ADL<sub>DSF</sub>-13-9</i>  | <i>Glyma13g41660</i> | 3 | 8.9   | 0.02    | 8.7        |                                                 | ②       |
| <i>g-ADL<sub>DSF</sub>-14-1</i>  | <i>Glyma14g02780</i> | 3 | 19.9  | 0.33    | 111.6      |                                                 | ⑤       |
| <i>g-ADL<sub>DSF</sub>-14-2</i>  | <i>Glyma14g02970</i> | 3 | 12.3  | 0.06    | 21.6       |                                                 | ③       |
| <i>g-ADL<sub>DSF</sub>-14-3</i>  | <i>Glyma14g14000</i> | 3 | 13.4  | 0.07    | 26.2       |                                                 | ⑤/⑧     |
| <i>g-ADL<sub>DSF</sub>-14-4</i>  | <i>Glyma14g24480</i> | 5 | 27.5  | 0.71    | 218.6      |                                                 | ④/⑤/①   |

|                                  |                      |           |       |         |            |                                                                |       |
|----------------------------------|----------------------|-----------|-------|---------|------------|----------------------------------------------------------------|-------|
| <i>g-ADL<sub>DSF</sub>-14-5</i>  | <i>Glyma14g33601</i> | 2         | 14.6  | 0.03    | 13.4       | <i>Fflr 21-1</i>                                               | ⑥     |
| <i>g-ADL<sub>DSF</sub>-14-6</i>  | <i>Glyma14g37330</i> | 3         | 18.0  | 0.25    | 87.9       |                                                                | ⑤/⑥   |
| <i>g-ADL<sub>DSF</sub>-14-7</i>  | <i>Glyma14g38910</i> | 4         | 13.7  | 0.06    | 23.1       |                                                                | ⑩     |
| <i>g-ADL<sub>DSF</sub>-15-1</i>  | <i>Glyma15g16000</i> | 2         | 2.0   | 2.8E-03 | 1.6        | <i>Fflr 12-3</i>                                               | ⑩     |
| <i>g-ADL<sub>DSF</sub>-15-2</i>  | <i>Glyma15g20200</i> | 2         | 12.0  | 0.1     | 37.4       |                                                                | ①     |
| <i>g-ADL<sub>DSF</sub>-15-3</i>  | <i>Glyma15g20935</i> | 2         | 24.5  | 0.67    | 212.4      |                                                                | ④/⑤/① |
| <i>g-ADL<sub>DSF</sub>-15-4</i>  | <i>Glyma15g25690</i> | 6         | 19.8  | 0.52    | 166.3      |                                                                | ②/⑦   |
| <i>g-ADL<sub>DSF</sub>-15-5</i>  | <i>Glyma15g38060</i> | 3         | 13.4  | 0.13    | 46.6       |                                                                | ③/⑦   |
| <i>g-ADL<sub>DSF</sub>-15-6</i>  | <i>Glyma15g40635</i> | 3         | 3.4   | 0.01    | 2.4        |                                                                | ⑩     |
| <i>g-ADL<sub>DSF</sub>-15-7</i>  | <i>Glyma15g43289</i> | 3         | 32.4  | 0.99    | 290.8      |                                                                | ⑧     |
| <i>g-ADL<sub>DSF</sub>-16-1</i>  | <i>Glyma16g03320</i> | 2         | 41.4  | 2.7     | 307.7      | <i>GmFT5a (1280.3Kb),<br/>LHY1a(1306.3Kb),GmFT3a(1307.0Kb)</i> | ①/③/⑧ |
| <i>g-ADL<sub>DSF</sub>-16-2</i>  | <i>Glyma16g25185</i> | 5         | 14.3  | 0.05    | 18.4       | <i>E9(1621.3Kb),FT2B(1660.1Kb),Fflr 9-3</i>                    | ⑩     |
| <i>g-ADL<sub>DSF</sub>-16-3</i>  | <i>Glyma16g33100</i> | 4         | 5.6   | 0.03    | 10.8       | <i>Fflr 13-8</i>                                               | ⑧     |
| <i>g-ADL<sub>DSF</sub>-16-4</i>  | <i>Glyma16g33480</i> | 3         | 13.4  | 0.08    | 28.9       | <i>Fflr 13-8</i>                                               | ⑩     |
| <i>g-ADL<sub>DSF</sub>-17-1</i>  | <i>Glyma17g01430</i> | 2         | 13.8  | 0.03    | 13.2       |                                                                | ⑤     |
| <i>g-ADL<sub>DSF</sub>-17-2</i>  | <i>Glyma17g04580</i> | 3         | 27.0  | 1.3     | 307.7      |                                                                | ⑩     |
| <i>g-ADL<sub>DSF</sub>-17-3</i>  | <i>Glyma17g08460</i> | 2         | 77.5  | 6.77    | 307.7 1.1  | 312.2                                                          | ⑩     |
| <i>g-ADL<sub>DSF</sub>-17-4</i>  | <i>Glyma17g09500</i> | 3         | 40.6  | 2.72    | 307.7 0.52 | 164.7                                                          | ⑩     |
| <i>g-ADL<sub>DSF</sub>-17-5</i>  | <i>Glyma17g14700</i> | 2         | 5.1   | 3.1E-03 | 1.7        |                                                                | ⑤     |
| <i>g-ADL<sub>DSF</sub>-17-6</i>  | <i>Glyma17g15350</i> | 2         | 17.1  | 0.2     | 73.7       |                                                                | ⑩     |
| <i>g-ADL<sub>DSF</sub>-17-7</i>  | <i>Glyma17g35130</i> | 2         | 15.2  | 0.02    | 7          |                                                                | ⑩     |
| <i>g-ADL<sub>DSF</sub>-18-1</i>  | <i>Glyma18g04820</i> | 3         | 10.9  | 0.01    | 4.2        |                                                                | ①     |
| <i>g-ADL<sub>DSF</sub>-18-2</i>  | <i>Glyma18g08180</i> | 3         | 19.9  | 0.28    | 98.6       | <i>Fflr 9-2</i>                                                | ⑩     |
| <i>g-ADL<sub>DSF</sub>-18-3</i>  | <i>Glyma18g16761</i> | 4         | 13.6  | 0.06    | 22.7       |                                                                | ⑧     |
| <i>g-ADL<sub>DSF</sub>-18-4</i>  | <i>Glyma18g26120</i> | 2         | 3.4   | 3.7E-03 | 1.9        | <i>Fflr 10-2</i>                                               | ⑧     |
| <i>g-ADL<sub>DSF</sub>-18-5</i>  | <i>Glyma18g38570</i> | 3         | 4.9   | 0.01    | 3          | <i>Fflr 10-2</i>                                               | ⑧     |
| <i>g-ADL<sub>DSF</sub>-18-6</i>  | <i>Glyma18g47720</i> | 2         | 4.1   | 0.01    | 2.5        | <i>SOC1(1800.6Kb)</i>                                          | ⑧     |
| <i>g-ADL<sub>DSF</sub>-18-7</i>  | <i>Glyma18g52250</i> | 6         | 9.4   | 0.05    | 16.5       | <i>FT1A(1033.0Kb),FT1B(1049.8Kb)</i>                           | ⑩     |
| <i>g-ADL<sub>DSF</sub>-19-1</i>  | <i>Glyma19g03440</i> | 4         | 16.3  | 0.2     | 68.3       |                                                                | ③/⑧   |
| <i>g-ADL<sub>DSF</sub>-19-2</i>  | <i>Glyma19g03590</i> | 4         | 19.1  | 0.34    | 116.4      |                                                                | ⑤     |
| <i>g-ADL<sub>DSF</sub>-19-3</i>  | <i>Glyma19g23640</i> | 4         | 13.5  | 0.07    | 25.7       |                                                                | ⑤/②   |
| <i>g-ADL<sub>DSF</sub>-19-4</i>  | <i>Glyma19g37230</i> | 4         | 19.0  | 0.19    | 65.6       | <i>Fflr 2-3,22-3,24-3</i>                                      | ⑩     |
| <i>g-ADL<sub>DSF</sub>-19-5</i>  | <i>Glyma19g39460</i> | 2         | 1.7   | 4.6E-03 | 2.3        | <i>E3(GmphyA3,1383.5Kb),Fflr 3-3,13-9</i>                      | ⑤     |
| <i>g-ADL<sub>DSF</sub>-19-6</i>  | <i>Glyma19g43320</i> | 2         | 17.7  | 0.15    | 55.7       | <i>Fflr 5-3,8-3,20-2</i>                                       | ⑧     |
| <i>g-ADL<sub>DSF</sub>-19-7</i>  | <i>Glyma19g44310</i> | 3         | 14.2  | 0.06    | 22.2       | <i>LHY2a(495.4Kb),Fflr 5-3,8-3</i>                             | ②/⑦   |
| <i>g-ADL<sub>DSF</sub>-20-1</i>  | <i>Glyma20g03330</i> | 3         | 8.5   | 0.02    | 6          |                                                                | ⑩     |
| <i>g-ADL<sub>DSF</sub>-20-2</i>  | <i>Glyma20g04761</i> | 2         | 11.4  | 0.05    | 21.3       | <i>Fflr 16-3,20-3</i>                                          | ⑤/⑦   |
| <i>g-ADL<sub>DSF</sub>-20-3</i>  | <i>Glyma20g08091</i> | 4         | 10.5  | 0.07    | 24.4       | <i>Fflr 16-3,20-3</i>                                          | ⑥     |
| <i>g-ADL<sub>DSF</sub>-20-4</i>  | <i>Glyma20g21151</i> | 3         | 11.8  | 0.02    | 6.3        | <i>E4(GmphyA2,1894.1Kb),Fflr 16-3,20-</i>                      | ⑥     |
| <i>g-ADL<sub>DSF</sub>-20-5</i>  | <i>Glyma20g25800</i> | 4         | 20.8  | 0.27    | 93.7       | <i>Fflr 25-3</i>                                               | ⑩     |
| <i>g-ADL<sub>DSF</sub>-20-6</i>  | <i>Glyma20g26220</i> | 5         | 12.7  | 0.1     | 35.5       | <i>Fflr 25-3</i>                                               | ②/①/⑧ |
| <i>g-ADL<sub>DSF</sub>-20-7</i>  | <i>Glyma20g31551</i> | 2         | 14.4  | 0.1     | 37.7       |                                                                | ⑤/⑦   |
| <i>g-ADL<sub>DSF</sub>-20-8</i>  | <i>Glyma20g32390</i> | 3         | 19.0  | 0.39    | 131.9      |                                                                | ⑨     |
| <i>g-ADL<sub>DSF</sub>-20-9</i>  | <i>Glyma20g32980</i> | 4         | 16.9  | 0.24    | 83.9       |                                                                | ①/⑧   |
| <i>g-ADL<sub>DSF</sub>-20-10</i> | <i>Glyma20g33430</i> | 4         | 28.6  | 0.83    | 250.3      |                                                                | ⑤     |
| <i>g-ADL<sub>DSF</sub>-20-11</i> | <i>Glyma20g38090</i> | 3         | 20.0  | 0.46    | 151.7      |                                                                | ⑩     |
| Total                            | 130                  | 390(3.00) | 75.35 | 3.93    | 67(44)     |                                                                | 170   |

Note: Gene code: for example, *g-ADL<sub>DSF</sub>-01-1*, where *ADL<sub>DSF</sub>* means DSF required accumulative day-length, -01



represents chromosome 1, and -1 represents its order on the chromosome according to its physical position. The position corresponds to the Williams 82 reference genome version 1 (Wm82.a1). Gene group: Gene Ontology groups (please see the notes of Table S2 for details).

**Table S5** The gene–allele system conferring AAT<sub>DSF</sub> identified from GASM-RTM-GWAS in the WSGP.

| Gene Code                        | Genes                | Allele no. | Model P<br>-lg(P) | Main-effect |        | Gene×Env. |        | Known Genes/QTLs                                                                                  | Gene group |
|----------------------------------|----------------------|------------|-------------------|-------------|--------|-----------|--------|---------------------------------------------------------------------------------------------------|------------|
|                                  |                      |            |                   | R2          | -lg(P) | R2        | -lg(P) |                                                                                                   |            |
| <i>g-AAT<sub>DSF</sub>-01-1</i>  | <i>Glyma01g02580</i> | 2          | 5.4               | 0.02        | 7.9    |           |        |                                                                                                   | ⑥          |
| <i>g-AAT<sub>DSF</sub>-01-2</i>  | <i>Glyma01g06270</i> | 3          | 19.3              | 3.2E-03     | 116.2  |           |        |                                                                                                   | ⑩          |
| <i>g-AAT<sub>DSF</sub>-01-3</i>  | <i>Glyma01g22830</i> | 2          | 69                | 4.26        | 307.7  |           |        | <i>Fflr 16-1</i>                                                                                  | ⑤          |
| <i>g-AAT<sub>DSF</sub>-02-1</i>  | <i>Glyma02g03920</i> | 2          | 40.3              | 1.6         | 307.7  |           |        |                                                                                                   | ⑩          |
| <i>g-AAT<sub>DSF</sub>-02-2</i>  | <i>Glyma02g04190</i> | 3          | 43.7              | 3.12        | 307.7  | 0.11      | 28.8   |                                                                                                   | ⑤/⑧        |
| <i>g-AAT<sub>DSF</sub>-02-3</i>  | <i>Glyma02g06530</i> | 2          | 12.8              | 0.09        | 27.2   |           |        |                                                                                                   | ⑤          |
| <i>g-AAT<sub>DSF</sub>-02-4</i>  | <i>Glyma02g07640</i> | 2          | 23.4              | 0.7         | 182    |           |        | <i>GmFT2c</i> (11.4Kb)                                                                            | ⑧          |
| <i>g-AAT<sub>DSF</sub>-02-5</i>  | <i>Glyma02g15561</i> | 4          | 9.3               | 0.01        | 2.3    |           |        | <i>Fflr 16-2</i>                                                                                  | ⑩          |
| <i>g-AAT<sub>DSF</sub>-02-6</i>  | <i>Glyma02g37350</i> | 3          | 21.8              | 0.65        | 169.4  |           |        | <i>Fflr 24-1</i>                                                                                  | ⑦          |
| <i>g-AAT<sub>DSF</sub>-02-7</i>  | <i>Glyma02g45790</i> | 3          | 4.1               | 0.01        | 2      |           |        |                                                                                                   | ⑧          |
| <i>g-AAT<sub>DSF</sub>-02-8</i>  | <i>Glyma02g46800</i> | 2          | 23.6              | 0.78        | 200    |           |        |                                                                                                   | ⑥          |
| <i>g-AAT<sub>DSF</sub>-02-9</i>  | <i>Glyma02g48010</i> | 2          | 36.4              | 2.1         | 307.7  |           |        |                                                                                                   | ⑩          |
| <i>g-AAT<sub>DSF</sub>-03-1</i>  | <i>Glyma03g06440</i> | 5          | 17                | 0.24        | 65.4   |           |        |                                                                                                   | ⑤          |
| <i>g-AAT<sub>DSF</sub>-03-2</i>  | <i>Glyma03g29230</i> | 4          | 5.9               | 0.01        | 1.5    |           |        |                                                                                                   | ⑧          |
| <i>g-AAT<sub>DSF</sub>-03-3</i>  | <i>Glyma03g33000</i> | 4          | 13.7              | 0.12        | 34.1   |           |        | <i>Drl</i> ( <i>TFL1A</i> ,1840.5Kb)                                                              | ⑩          |
| <i>g-AAT<sub>DSF</sub>-03-4</i>  | <i>Glyma03g41520</i> | 2          | 5.7               | 0.02        | 7.4    |           |        |                                                                                                   | ⑩          |
| <i>g-AAT<sub>DSF</sub>-03-5</i>  | <i>Glyma03g42060</i> | 3          | 7.9               | 0.02        | 4.6    |           |        | <i>LHY2b</i> (130.6Kb)                                                                            | ⑩          |
| <i>g-AAT<sub>DSF</sub>-04-1</i>  | <i>Glyma04g02740</i> | 3          | 19.7              | 1.0E-03     | 105.2  |           |        |                                                                                                   | ⑦          |
| <i>g-AAT<sub>DSF</sub>-04-2</i>  | <i>Glyma04g02850</i> | 4          | 16.6              | 0.22        | 62.5   |           |        |                                                                                                   | ⑤/⑧        |
| <i>g-AAT<sub>DSF</sub>-04-3</i>  | <i>Glyma04g05600</i> | 2          | 12.3              | 0.1         | 32     |           |        | <i>J</i> ( <i>GmELF3</i> ,232.7Kb)                                                                | ①/⑧        |
| <i>g-AAT<sub>DSF</sub>-04-4</i>  | <i>Glyma04g35730</i> | 4          | 5.9               | 0.01        | 3.8    |           |        |                                                                                                   | ⑥          |
| <i>g-AAAT<sub>DSF</sub>-04-5</i> | <i>Glyma04g36240</i> | 3          | 31.4              | 1.16        | 275.3  |           |        |                                                                                                   | ⑩          |
| <i>g-AAT<sub>DSF</sub>-04-6</i>  | <i>Glyma04g36630</i> | 2          | 22.2              | 3.2E-03     | 167.1  |           |        |                                                                                                   | ④/①/⑦      |
| <i>g-AAT<sub>DSF</sub>-04-7</i>  | <i>Glyma04g42981</i> | 2          | 9.3               | 0.05        | 16.9   |           |        |                                                                                                   | ⑩          |
| <i>g-AAT<sub>DSF</sub>-05-1</i>  | <i>Glyma05g02470</i> | 2          | 21.7              | 1.5E-03     | 158.2  |           |        |                                                                                                   | ⑥/⑧        |
| <i>g-AAT<sub>DSF</sub>-05-2</i>  | <i>Glyma05g31250</i> | 3          | 14                | 0.09        | 25.7   |           |        |                                                                                                   | ③          |
| <i>g-AAT<sub>DSF</sub>-06-1</i>  | <i>Glyma06g04140</i> | 2          | 22.6              | 0.66        | 174.4  |           |        |                                                                                                   | ⑩          |
| <i>g-AAT<sub>DSF</sub>-06-2</i>  | <i>Glyma06g11370</i> | 4          | 10.2              | 0.05        | 15.2   |           |        |                                                                                                   | ⑩          |
| <i>g-AAT<sub>DSF</sub>-06-3</i>  | <i>Glyma06g16930</i> | 3          | 15.5              | 0.23        | 66.1   |           |        |                                                                                                   | ⑧          |
| <i>g-AAT<sub>DSF</sub>-06-4</i>  | <i>Glyma06g19651</i> | 2          | 3.2               | 0.01        | 4.5    |           |        | <i>Fflr 26-3,26-4</i>                                                                             | ⑧          |
| <i>g-AAT<sub>DSF</sub>-06-5</i>  | <i>Glyma06g20950</i> | 2          | 7.1               | 0.01        | 4.9    |           |        | <i>Fflr 26-2,26-5</i>                                                                             | ⑤          |
| <i>g-AAT<sub>DSF</sub>-06-6</i>  | <i>Glyma06g23580</i> | 4          | 56.3              | 4.41        | 307.7  |           |        | <i>E1</i> (696.3Kb), <i>Fflr 8-1,9-1,10-1,20-1, 22-2,23-1,26-10,26-11,26-13,26-15,26-16,26-17</i> | ⑩          |
| <i>g-AAT<sub>DSF</sub>-06-7</i>  | <i>Glyma06g32870</i> | 4          | 18.1              | 0.27        | 74.3   |           |        | <i>Fflr 3-1,7-1,8-1,9-1,10-1,18-1,20-1, 22-2,23-1,26-10,26-13,26-16,26-18</i>                     | ⑩          |
| <i>g-AAT<sub>DSF</sub>-06-8</i>  | <i>Glyma06g36380</i> | 2          | 35.6              | 1.91        | 307.7  |           |        | <i>Fflr 3-1,7-1,8-1,9-1,10-1,18-1,20-1, 22-2,23-1,26-10,26-13,26-16,26-18</i>                     | ④          |
| <i>g-AAT<sub>DSF</sub>-06-9</i>  | <i>Glyma06g40670</i> | 4          | 17.4              | 4.4E-04     | 72     |           |        | <i>Fflr 2-1,9-1,10-1,20-1</i>                                                                     | ⑧          |
| <i>g-AAT<sub>DSF</sub>-06-10</i> | <i>Glyma06g42730</i> | 2          | 5.5               | 0.01        | 4.5    |           |        | <i>Fflr 1-1,2-1,9-1,10-1,20-1</i>                                                                 | ⑥          |
| <i>g-AAT<sub>DSF</sub>-06-11</i> | <i>Glyma06g45220</i> | 2          | 4.3               | 0.02        | 6.4    |           |        |                                                                                                   | ⑩          |
| <i>g-AAT<sub>DSF</sub>-06-12</i> | <i>Glyma06g47590</i> | 4          | 12.3              | 0.04        | 10.1   |           |        |                                                                                                   | ⑩          |
| <i>g-AAT<sub>DSF</sub>-07-1</i>  | <i>Glyma07g00520</i> | 4          | 8.4               | 0.05        | 14.3   |           |        |                                                                                                   | ⑤/③/⑦/⑧    |
| <i>g-AAT<sub>DSF</sub>-07-2</i>  | <i>Glyma07g09170</i> | 8          | 19                | 3.6E-03     | 140.1  |           |        | <i>Fflr 2-2</i>                                                                                   | ⑩          |

|                                 |                      |   |      |         |       |                                     |         |
|---------------------------------|----------------------|---|------|---------|-------|-------------------------------------|---------|
| <i>g-AAT<sub>DSF</sub>-07-3</i> | <i>Glyma07g10060</i> | 5 | 12.5 | 0.11    | 29.4  | <i>Fflr 2-2</i>                     | ⑩       |
| <i>g-AAT<sub>DSF</sub>-07-4</i> | <i>Glyma07g14870</i> | 3 | 11.7 | 6.1E-04 | 12.4  |                                     | ⑤       |
| <i>g-AAT<sub>DSF</sub>-07-5</i> | <i>Glyma07g30140</i> | 2 | 2.5  | 0.01    | 2.5   |                                     | ⑤       |
| <i>g-AAT<sub>DSF</sub>-07-6</i> | <i>Glyma07g36065</i> | 3 | 16.6 | 0.27    | 75.9  |                                     | ⑥/⑧     |
| <i>g-AAT<sub>DSF</sub>-08-1</i> | <i>Glyma08g03210</i> | 4 | 64.5 | 6.14    | 307.7 |                                     | ⑨       |
| <i>g-AAT<sub>DSF</sub>-08-2</i> | <i>Glyma08g04320</i> | 3 | 18.4 | 0.32    | 91    |                                     | ⑩       |
| <i>g-AAT<sub>DSF</sub>-08-3</i> | <i>Glyma08g13330</i> | 3 | 9.7  | 0.03    | 9.4   |                                     | ⑤/⑧     |
| <i>g-AAT<sub>DSF</sub>-08-4</i> | <i>Glyma08g14150</i> | 3 | 3.2  | 0.01    | 2.8   |                                     | ⑩       |
| <i>g-AAT<sub>DSF</sub>-08-5</i> | <i>Glyma08g20140</i> | 4 | 19.4 | 0.31    | 85.1  |                                     | ④/⑤     |
| <i>g-AAT<sub>DSF</sub>-08-6</i> | <i>Glyma08g28890</i> | 2 | 1.8  | 3.3E-03 | 1.5   | <i>COL2a(578.7Kb)</i>               | ①/⑦     |
| <i>g-AAT<sub>DSF</sub>-08-7</i> | <i>Glyma08g43140</i> | 2 | 21.4 | 0.63    | 166.7 |                                     | ⑩       |
| <i>g-AAT<sub>DSF</sub>-08-8</i> | <i>Glyma08g43930</i> | 3 | 15.9 | 0.26    | 72.7  |                                     | ⑩       |
| <i>g-AAT<sub>DSF</sub>-09-1</i> | <i>Glyma09g02470</i> | 3 | 38.6 | 2.95    | 307.7 | 0.27 71.3                           | ⑧       |
| <i>g-AAT<sub>DSF</sub>-09-2</i> | <i>Glyma09g07661</i> | 2 | 20   | 3.2E-03 | 118.9 | <i>Fflr 24-2</i>                    | ③       |
| <i>g-AAT<sub>DSF</sub>-09-3</i> | <i>Glyma09g07760</i> | 5 | 15   | 0.14    | 38.2  | <i>Fflr 24-2</i>                    | ⑩       |
| <i>g-AAT<sub>DSF</sub>-09-4</i> | <i>Glyma09g25215</i> | 2 | 19.4 | 1.6E-03 | 94    | <i>Fflr 24-2</i>                    | ④/⑤/⑥   |
| <i>g-AAT<sub>DSF</sub>-09-5</i> | <i>Glyma09g27940</i> | 4 | 9.2  | 0.05    | 14.7  | <i>Fflr 24-2</i>                    | ⑥       |
| <i>g-AAT<sub>DSF</sub>-09-6</i> | <i>Glyma09g28620</i> | 4 | 21.5 | 3.5E-03 | 160.6 |                                     | ⑥       |
| <i>g-AAT<sub>DSF</sub>-09-7</i> | <i>Glyma09g32350</i> | 3 | 18   | 3.1E-03 | 113.8 |                                     | ⑩       |
| <i>g-AAT<sub>DSF</sub>-09-8</i> | <i>Glyma09g34850</i> | 4 | 31.1 | 1.85    | 307.7 |                                     | ⑨       |
| <i>g-AAT<sub>DSF</sub>-10-1</i> | <i>Glyma10g24391</i> | 4 | 20.9 | 3.3E-03 | 115.8 | <i>Fflr 13-10</i>                   | ⑤       |
| <i>g-AAT<sub>DSF</sub>-10-2</i> | <i>Glyma10g26450</i> | 5 | 30.9 | 1.79    | 307.7 | <i>E4(PhyA,2112.8Kb),Fflr 13-10</i> | ④/⑤/②/③ |
| <i>g-AAT<sub>DSF</sub>-10-3</i> | <i>Glyma10g34490</i> | 2 | 1.9  | 0.01    | 2.8   |                                     | ⑨       |
| <i>g-AAT<sub>DSF</sub>-10-4</i> | <i>Glyma10g35960</i> | 2 | 28.3 | 0.99    | 245.1 | <i>E2(GmGI,545.6Kb),Fflr 24-4</i>   | ⑦       |
| <i>g-AAT<sub>DSF</sub>-11-1</i> | <i>Glyma11g05990</i> | 3 | 11.6 | 1.6E-03 | 19.6  |                                     | ⑩       |
| <i>g-AAT<sub>DSF</sub>-11-2</i> | <i>Glyma11g10490</i> | 3 | 9.3  | 0.03    | 10.4  |                                     | ⑩       |
| <i>g-AAT<sub>DSF</sub>-11-3</i> | <i>Glyma11g14500</i> | 3 | 39   | 1.79    | 307.7 |                                     | ⑩       |
| <i>g-AAT<sub>DSF</sub>-11-4</i> | <i>Glyma11g19670</i> | 3 | 31.8 | 1.11    | 267.2 | <i>Fflr 8-14</i>                    | ⑧       |
| <i>g-AAT<sub>DSF</sub>-11-5</i> | <i>Glyma11g25900</i> | 2 | 14   | 0.12    | 36    |                                     | ③       |
| <i>g-AAT<sub>DSF</sub>-12-1</i> | <i>Glyma12g08000</i> | 4 | 29.9 | 1.73    | 307.7 | <i>PRR3b(152.2Kb),Fflr 25-2</i>     | ⑩       |
| <i>g-AAT<sub>DSF</sub>-12-2</i> | <i>Glyma12g10880</i> | 3 | 18.3 | 6.9E-04 | 48.3  |                                     | ⑩       |
| <i>g-AAT<sub>DSF</sub>-12-3</i> | <i>Glyma12g34830</i> | 3 | 11.4 | 0.08    | 24.2  |                                     | ⑩       |
| <i>g-AAT<sub>DSF</sub>-13-1</i> | <i>Glyma13g02620</i> | 3 | 8.4  | 0.01    | 2.8   |                                     | ④/⑤     |
| <i>g-AAT<sub>DSF</sub>-13-2</i> | <i>Glyma13g07110</i> | 3 | 99.3 | 6.25    | 307.7 |                                     | ⑦       |
| <i>g-AAT<sub>DSF</sub>-13-3</i> | <i>Glyma13g21340</i> | 3 | 12.3 | 0.07    | 19.6  |                                     | ⑧       |
| <i>g-AAT<sub>DSF</sub>-13-4</i> | <i>Glyma13g23850</i> | 2 | 18.1 | 5.0E-03 | 53.4  |                                     | ⑤/③/⑧   |
| <i>g-AAT<sub>DSF</sub>-13-5</i> | <i>Glyma13g25480</i> | 6 | 18.7 | 1.3E-03 | 133.3 |                                     | ④       |
| <i>g-AAT<sub>DSF</sub>-13-6</i> | <i>Glyma13g29020</i> | 2 | 18.1 | 6.1E-04 | 121.3 |                                     | ⑩       |
| <i>g-AAT<sub>DSF</sub>-13-7</i> | <i>Glyma13g41650</i> | 3 | 9.6  | 0.01    | 4.3   |                                     | ⑥       |
| <i>g-AAT<sub>DSF</sub>-13-8</i> | <i>Glyma13g43320</i> | 4 | 14.8 | 0.15    | 43.9  |                                     | ④/①     |
| <i>g-AAT<sub>DSF</sub>-14-1</i> | <i>Glyma14g00240</i> | 4 | 13.6 | 0.15    | 41.7  |                                     | ②       |
| <i>g-AAT<sub>DSF</sub>-14-2</i> | <i>Glyma14g04690</i> | 2 | 30.8 | 0.96    | 238.2 |                                     | ⑥       |
| <i>g-AAT<sub>DSF</sub>-14-3</i> | <i>Glyma14g05140</i> | 2 | 4.1  | 0.02    | 5.9   |                                     | ⑩       |
| <i>g-AAT<sub>DSF</sub>-14-4</i> | <i>Glyma14g09720</i> | 2 | 6.7  | 0.03    | 10.4  |                                     | ⑩       |
| <i>g-AAT<sub>DSF</sub>-14-5</i> | <i>Glyma14g36980</i> | 2 | 20.1 | 2.7E-03 | 115.9 |                                     | ⑥       |
| <i>g-AAT<sub>DSF</sub>-14-6</i> | <i>Glyma14g39375</i> | 3 | 18.9 | 3.9E-03 | 134.4 |                                     | ⑩       |
| <i>g-AAT<sub>DSF</sub>-15-1</i> | <i>Glyma15g00460</i> | 2 | 11.9 | 3.9E-03 | 22.5  |                                     | ⑧       |
| <i>g-AAT<sub>DSF</sub>-15-2</i> | <i>Glyma15g04891</i> | 2 | 11.5 | 0.09    | 26.7  |                                     | ⑩       |
| <i>g-AAT<sub>DSF</sub>-15-3</i> | <i>Glyma15g08420</i> | 2 | 8.9  | 0.04    | 14.1  |                                     | ③/⑧     |
| <i>g-AAT<sub>DSF</sub>-15-4</i> | <i>Glyma15g12930</i> | 2 | 14.1 | 0.15    | 44.1  | <i>Fflr 12-3</i>                    | ⑤/①     |
| <i>g-AAT<sub>DSF</sub>-15-5</i> | <i>Glyma15g13410</i> | 2 | 4.4  | 0.02    | 7.3   | <i>Fflr 12-3</i>                    | ⑩       |

|                                  |                      |           |       |         |        |                                                                             |       |
|----------------------------------|----------------------|-----------|-------|---------|--------|-----------------------------------------------------------------------------|-------|
| <i>g-AAT<sub>DSF</sub>-15-6</i>  | <i>Glyma15g18840</i> | 2         | 4.8   | 0.01    | 4.5    |                                                                             | ⑩     |
| <i>g-AAT<sub>DSF</sub>-15-7</i>  | <i>Glyma15g34840</i> | 3         | 42.2  | 3.22    | 307.7  |                                                                             | ②/⑧   |
| <i>g-AAT<sub>DSF</sub>-15-8</i>  | <i>Glyma15g35941</i> | 5         | 17.4  | 0.32    | 88.7   |                                                                             | ⑩     |
| <i>g-AAT<sub>DSF</sub>-15-9</i>  | <i>Glyma15g42762</i> | 4         | 8.7   | 0.07    | 21.3   |                                                                             | ⑩     |
| <i>g-AAT<sub>DSF</sub>-15-10</i> | <i>Glyma15g43010</i> | 2         | 14.4  | 0.1     | 31     |                                                                             | ⑩     |
| <i>g-AAT<sub>DSF</sub>-16-1</i>  | <i>Glyma16g00480</i> | 2         | 11.9  | 0.08    | 23.8   | <i>LHY1a</i> (1336.7Kb)                                                     | ⑤     |
| <i>g-AAT<sub>DSF</sub>-16-2</i>  | <i>Glyma16g03320</i> | 2         | 37.6  | 2.3     | 307.7  | 0.17 48.4                                                                   | ①/③/⑧ |
| <i>g-AAT<sub>DSF</sub>-16-3</i>  | <i>Glyma16g03860</i> | 2         | 15.4  | 0.18    | 52.1   | <i>GmFT5a</i> (1280.3Kb),<br><i>LHY1a</i> (1306.3Kb), <i>GmFT3a</i> (1307.0 | ⑩     |
| <i>g-AAT<sub>DSF</sub>-16-4</i>  | <i>Glyma16g08430</i> | 4         | 10.1  | 0.05    | 13.7   | <i>Fflr 13-7</i>                                                            | ⑤     |
| <i>g-AAT<sub>DSF</sub>-16-5</i>  | <i>Glyma16g28950</i> | 2         | 16.5  | 0.25    | 73.6   |                                                                             | ⑩     |
| <i>g-AAT<sub>DSF</sub>-16-6</i>  | <i>Glyma16g32650</i> | 3         | 17.6  | 0.25    | 70.6   | <i>Fflr 13-8</i>                                                            | ①     |
| <i>g-AAT<sub>DSF</sub>-16-7</i>  | <i>Glyma16g34500</i> | 2         | 1.4   | 0.01    | 2.5    | <i>Fflr 13-8</i>                                                            | ⑥     |
| <i>g-AAT<sub>DSF</sub>-17-1</i>  | <i>Glyma17g05595</i> | 3         | 22.4  | 0.79    | 201.7  |                                                                             | ⑩     |
| <i>g-AAT<sub>DSF</sub>-17-2</i>  | <i>Glyma17g07475</i> | 2         | 2.9   | 0.01    | 3.1    |                                                                             | ⑥     |
| <i>g-AAT<sub>DSF</sub>-17-3</i>  | <i>Glyma17g08460</i> | 2         | 76.8  | 7.32    | 307.7  |                                                                             | ⑩     |
| <i>g-AAT<sub>DSF</sub>-17-4</i>  | <i>Glyma17g09500</i> | 3         | 38.2  | 2.3     | 307.7  |                                                                             | ⑩     |
| <i>g-AAT<sub>DSF</sub>-18-1</i>  | <i>Glyma18g01200</i> | 2         | 11.9  | 0.04    | 13.9   |                                                                             | ⑩     |
| <i>g-AAT<sub>DSF</sub>-18-2</i>  | <i>Glyma18g03180</i> | 3         | 13.5  | 0.07    | 21     |                                                                             | ⑩     |
| <i>g-AAT<sub>DSF</sub>-18-3</i>  | <i>Glyma18g08410</i> | 5         | 31.3  | 1.61    | 307.7  | <i>Fflr 9-2</i>                                                             | ⑥     |
| <i>g-AAT<sub>DSF</sub>-18-4</i>  | <i>Glyma18g08440</i> | 3         | 16.4  | 0.11    | 31.3   | <i>Fflr 9-2</i>                                                             | ⑧     |
| <i>g-AAT<sub>DSF</sub>-18-5</i>  | <i>Glyma18g17395</i> | 4         | 31.3  | 1.59    | 307.7  |                                                                             | ⑧     |
| <i>g-AAT<sub>DSF</sub>-18-6</i>  | <i>Glyma18g17515</i> | 3         | 4.7   | 0.02    | 4.9    |                                                                             | ⑩     |
| <i>g-AAT<sub>DSF</sub>-18-7</i>  | <i>Glyma18g18931</i> | 2         | 23.9  | 1.6E-03 | 169.1  |                                                                             | ⑨     |
| <i>g-AAT<sub>DSF</sub>-18-8</i>  | <i>Glyma18g20820</i> | 3         | 9.5   | 0.05    | 13.8   | <i>Fflr10-2</i>                                                             | ⑥     |
| <i>g-AAT<sub>DSF</sub>-18-9</i>  | <i>Glyma18g26120</i> | 2         | 2.5   | 3.8E-03 | 1.7    | <i>Fflr10-2</i>                                                             | ⑥     |
| <i>g-AAT<sub>DSF</sub>-18-10</i> | <i>Glyma18g48980</i> | 3         | 8.9   | 0.05    | 16.2   |                                                                             | ⑧     |
| <i>g-AAT<sub>DSF</sub>-18-11</i> | <i>Glyma18g50910</i> | 5         | 8.3   | 0.03    | 7.6    |                                                                             | ⑤/①   |
| <i>g-AAT<sub>DSF</sub>-18-12</i> | <i>Glyma18g52381</i> | 4         | 5.3   | 0.02    | 4.2    | <i>GmFT1a</i> (939.7Kb), <i>GmFT1b</i> (956.5<br>Kb)                        | ⑩     |
| <i>g-AAT<sub>DSF</sub>-19-1</i>  | <i>Glyma19g23640</i> | 4         | 9.9   | 0.02    | 4      |                                                                             | ⑤/②   |
| <i>g-AAT<sub>DSF</sub>-19-2</i>  | <i>Glyma19g36710</i> | 2         | 6     | 0.02    | 6.4    | <i>Fflr 2-3,22-3,24-3</i>                                                   | ⑤/②   |
| <i>g-AAT<sub>DSF</sub>-19-3</i>  | <i>Glyma19g37840</i> | 2         | 9.1   | 0.02    | 8.2    | <i>Fflr 2-3,3-3,22-3,24-3</i>                                               | ⑩     |
| <i>g-AAT<sub>DSF</sub>-19-4</i>  | <i>Glyma19g38331</i> | 2         | 13.8  | 0.11    | 34.1   | <i>Fflr 3-3,22-3</i>                                                        | ⑧     |
| <i>g-AAT<sub>DSF</sub>-19-5</i>  | <i>Glyma19g40710</i> | 2         | 16.2  | 0.24    | 69.7   | <i>E3</i> ( <i>GmphyA3</i> ,463.8Kb), <i>Fflr 13-9</i>                      | ⑩     |
| <i>g-AAT<sub>DSF</sub>-19-6</i>  | <i>Glyma19g42340</i> | 2         | 4     | 3.2E-03 | 1.5    | <i>LHY2a</i> (1912.4Kb), <i>Fflr 5-3,8-3,20-2</i>                           | ①/⑧   |
| <i>g-AAT<sub>DSF</sub>-20-1</i>  | <i>Glyma20g00565</i> | 2         | 11.2  | 0.05    | 15.6   |                                                                             | ⑩     |
| <i>g-AAT<sub>DSF</sub>-20-2</i>  | <i>Glyma20g20053</i> | 3         | 20.7  | 0.31    | 86.9   | <i>Fflr 16-3,20-3,25-3</i>                                                  | ⑤/①   |
| <i>g-AAT<sub>DSF</sub>-20-3</i>  | <i>Glyma20g24830</i> | 6         | 18.5  | 0.34    | 92.5   | <i>Fflr 25-3</i>                                                            | ⑦     |
| <i>g-AAT<sub>DSF</sub>-20-4</i>  | <i>Glyma20g24860</i> | 3         | 18.2  | 8.3E-04 | 119.3  | <i>Fflr 25-3</i>                                                            | ⑩     |
| <i>g-AAT<sub>DSF</sub>-20-5</i>  | <i>Glyma20g26360</i> | 2         | 3.7   | 0.01    | 2.7    | <i>Fflr 25-3</i>                                                            | ⑩     |
| Total                            | 130                  | 384(2.95) | 73.76 | 0.55    | 65(47) |                                                                             | 162   |

Note: Gene code: for example, *g-AAT<sub>DSF</sub>-01-1*, where *AAT<sub>DSF</sub>* means DSF required accumulative active temperature, -01 represents chromosome 1, and -1 represents its order on the chromosome according to its physical position. The position corresponds to the Williams 82 reference genome version 1 (Wm82.a1). Gene group: Gene Ontology groups (please see the notes of Table S2 for details).

**Table S6** The gene–allele system conferring ADL<sub>DFM</sub> identified from GASM-RTM-GWAS in the WSGP.

| Gene Code                        | Genes                | Allele no. | Model P<br>-lg(P) | Main-effect    |        | Gene×Env.      |       | Known Genes/QTLs               | Gene group |
|----------------------------------|----------------------|------------|-------------------|----------------|--------|----------------|-------|--------------------------------|------------|
|                                  |                      |            |                   | R <sup>2</sup> | -lg(P) | R <sup>2</sup> | type  |                                |            |
| <i>g-ADL<sub>DFM</sub>-01-1</i>  | <i>Glyma01g02525</i> | 4          | 2.2               | 0.01           | 1.3    |                |       |                                | ⑤/⑦/⑨      |
| <i>g-ADL<sub>DFM</sub>-01-2</i>  | <i>Glyma01g33986</i> | 2          | 7.6               | 0.04           | 5.5    |                |       |                                | ②/⑧        |
| <i>g-ADL<sub>DFM</sub>-01-3</i>  | <i>Glyma01g36545</i> | 3          | 11.6              | 0.20           | 25.8   |                |       |                                | ⑩          |
| <i>g-ADL<sub>DFM</sub>-02-1</i>  | <i>Glyma02g00371</i> | 4          | 86.7              | 2.72           | 281.1  | 8.32           | 307.7 |                                | ⑧          |
| <i>g-ADL<sub>DFM</sub>-02-2</i>  | <i>Glyma02g08091</i> | 2          | 14.0              | 0.21           | 28.2   |                |       |                                | ⑩          |
| <i>g-ADL<sub>DFM</sub>-02-3</i>  | <i>Glyma02g08620</i> | 3          | 13.2              | 0.30           | 38.3   |                |       |                                | ⑧          |
| <i>g-ADL<sub>DFM</sub>-02-4</i>  | <i>Glyma02g31295</i> | 3          | 2.6               | 0.02           | 2.7    |                |       | <i>Rsl 7-1</i>                 | ⑤          |
| <i>g-ADL<sub>DFM</sub>-02-5</i>  | <i>Glyma02g36665</i> | 2          | 13.6              | 0.01           | 2.6    |                |       |                                | ⑩          |
| <i>g-ADL<sub>DFM</sub>-02-6</i>  | <i>Glyma02g43025</i> | 2          | 4.9               | 0.06           | 8.3    |                |       |                                | ⑧/⑨        |
| <i>g-ADL<sub>DFM</sub>-02-7</i>  | <i>Glyma02g46810</i> | 2          | 12.5              | 0.20           | 26.6   |                |       |                                | ⑥          |
| <i>g-ADL<sub>DFM</sub>-03-1</i>  | <i>Glyma03g02500</i> | 3          | 15.7              | 0.44           | 55.8   |                |       |                                | ⑤          |
| <i>g-ADL<sub>DFM</sub>-03-2</i>  | <i>Glyma03g02940</i> | 6          | 9.6               | 0.10           | 10.9   |                |       |                                | ⑩          |
| <i>g-ADL<sub>DFM</sub>-03-3</i>  | <i>Glyma03g04590</i> | 5          | 2.8               | 0.02           | 2.2    |                |       |                                | ⑦          |
| <i>g-ADL<sub>DFM</sub>-03-4</i>  | <i>Glyma03g06483</i> | 3          | 32.6              | 1.31           | 152.8  | 1.51           | 167.9 | <i>Dt1(TFL1a,2033.9Kb)</i>     | ⑤/⑦/⑥      |
| <i>g-ADL<sub>DFM</sub>-03-5</i>  | <i>Glyma03g27290</i> | 2          | 3.9               | 0.03           | 4.6    |                |       |                                | ⑦          |
| <i>g-ADL<sub>DFM</sub>-03-6</i>  | <i>Glyma03g29230</i> | 4          | 15.7              | 0.36           | 45.1   |                |       |                                | ⑧          |
| <i>g-ADL<sub>DFM</sub>-03-7</i>  | <i>Glyma03g38171</i> | 2          | 2.2               | 0.01           | 2.4    |                |       |                                | ⑩          |
| <i>g-ADL<sub>DFM</sub>-03-8</i>  | <i>Glyma03g39850</i> | 3          | 14.4              | 0.40           | 50.3   |                |       |                                | ⑥          |
| <i>g-ADL<sub>DFM</sub>-03-9</i>  | <i>Glyma03g41280</i> | 3          | 12.5              | 0.21           | 27.2   |                |       |                                | ⑩          |
| <i>g-ADL<sub>DFM</sub>-03-10</i> | <i>Glyma03g41360</i> | 2          | 6.9               | 0.05           | 8.0    |                |       |                                | ⑦/⑧        |
| <i>g-ADL<sub>DFM</sub>-04-1</i>  | <i>Glyma04g01990</i> | 2          | 6.4               | 0.01           | 2.6    |                |       |                                | ⑤          |
| <i>g-ADL<sub>DFM</sub>-04-2</i>  | <i>Glyma04g05471</i> | 5          | 14.6              | 0.17           | 19.9   |                |       |                                | ⑧          |
| <i>g-ADL<sub>DFM</sub>-04-3</i>  | <i>Glyma04g09950</i> | 2          | 14.3              | 0.22           | 29.6   |                |       |                                | ⑨          |
| <i>g-ADL<sub>DFM</sub>-04-4</i>  | <i>Glyma04g10050</i> | 4          | 21.8              | 0.81           | 97.3   |                |       | <i>CRY1a(953.6Kb)</i>          | ⑦/⑥        |
| <i>g-ADL<sub>DFM</sub>-04-5</i>  | <i>Glyma04g12320</i> | 2          | 22.8              | 1.07           | 128.9  |                |       |                                | ⑤          |
| <i>g-ADL<sub>DFM</sub>-04-6</i>  | <i>Glyma04g33110</i> | 3          | 6.2               | 0.05           | 6.2    |                |       | <i>Rsl 2-2,Rsl 3-4,Rsl 5-1</i> | ⑤/②        |
| <i>g-ADL<sub>DFM</sub>-04-7</i>  | <i>Glyma04g36260</i> | 3          | 4.3               | 0.01           | 1.4    |                |       |                                | ⑧          |
| <i>g-ADL<sub>DFM</sub>-04-8</i>  | <i>Glyma04g42900</i> | 3          | 13.2              | 0.12           | 15.6   |                |       |                                | ⑥          |
| <i>g-ADL<sub>DFM</sub>-05-1</i>  | <i>Glyma05g04561</i> | 2          | 30.0              | 1.22           | 145.4  |                |       |                                | ⑩          |
| <i>g-ADL<sub>DFM</sub>-05-2</i>  | <i>Glyma05g22680</i> | 2          | 29.9              | 0.96           | 117.4  |                |       |                                | ⑩          |
| <i>g-ADL<sub>DFM</sub>-05-3</i>  | <i>Glyma05g24580</i> | 2          | 18.1              | 0.47           | 60.8   |                |       | <i>J(ELF3A, 103.8Kb)</i>       | ⑩          |
| <i>g-ADL<sub>DFM</sub>-05-4</i>  | <i>Glyma05g29880</i> | 2          | 18.4              | 0.22           | 29.8   |                |       | <i>FLC(1324.5Kb)</i>           | ⑩          |
| <i>g-ADL<sub>DFM</sub>-05-5</i>  | <i>Glyma05g35310</i> | 2          | 8.0               | 0.03           | 5.1    |                |       |                                | ⑥          |
| <i>g-ADL<sub>DFM</sub>-06-1</i>  | <i>Glyma06g03470</i> | 2          | 8.9               | 0.14           | 19.6   |                |       |                                | ⑤          |
| <i>g-ADL<sub>DFM</sub>-06-2</i>  | <i>Glyma06g05890</i> | 2          | 22.1              | 0.60           | 76.3   |                |       |                                | ⑥          |
| <i>g-ADL<sub>DFM</sub>-06-3</i>  | <i>Glyma06g13985</i> | 3          | 6.5               | 0.03           | 4.4    |                |       | <i>WRKY76(478.9Kb)</i>         | ⑩          |
| <i>g-ADL<sub>DFM</sub>-06-4</i>  | <i>Glyma06g15890</i> | 2          | 3.4               | 0.03           | 4.1    |                |       |                                | ②/⑧        |
| <i>g-ADL<sub>DFM</sub>-06-5</i>  | <i>Glyma06g19480</i> | 2          | 19.1              | 0.52           | 66.4   |                |       |                                | ②/⑦/⑨      |
| <i>g-ADL<sub>DFM</sub>-06-6</i>  | <i>Glyma06g23580</i> | 4          | 9.5               | 0.08           | 10.4   |                |       | <i>E1(696.3Kb)</i>             | ⑩          |
| <i>g-ADL<sub>DFM</sub>-06-7</i>  | <i>Glyma06g40670</i> | 4          | 18.9              | 0.60           | 73.7   |                |       |                                | ⑧          |
| <i>g-ADL<sub>DFM</sub>-07-1</i>  | <i>Glyma07g05290</i> | 2          | 4.2               | 0.01           | 2.0    |                |       |                                | ⑩          |
| <i>g-ADL<sub>DFM</sub>-07-2</i>  | <i>Glyma07g09420</i> | 5          | 26.1              | 1.56           | 175.2  |                |       |                                | ⑧          |
| <i>g-ADL<sub>DFM</sub>-07-3</i>  | <i>Glyma07g10541</i> | 3          | 11.8              | 0.18           | 24.1   |                |       |                                | ⑧          |
| <i>g-ADL<sub>DFM</sub>-07-4</i>  | <i>Glyma07g10621</i> | 6          | 17.1              | 0.44           | 52.2   |                |       |                                | ⑧          |
| <i>g-ADL<sub>DFM</sub>-07-5</i>  | <i>Glyma07g11091</i> | 3          | 13.0              | 0.10           | 12.6   |                |       |                                | ⑩          |
| <i>g-ADL<sub>DFM</sub>-07-6</i>  | <i>Glyma07g29650</i> | 2          | 20.3              | 0.62           | 77.9   |                |       |                                | ⑨          |

|                                 |                      |   |      |      |       |                                                       |       |  |       |
|---------------------------------|----------------------|---|------|------|-------|-------------------------------------------------------|-------|--|-------|
| <i>g-ADL<sub>DFM</sub>-07-7</i> | <i>Glyma07g39110</i> | 3 | 13.0 | 0.18 | 23.4  |                                                       |       |  | ⑩     |
| <i>g-ADL<sub>DFM</sub>-07-8</i> | <i>Glyma07g40260</i> | 2 | 26.4 | 1.00 | 121.2 |                                                       |       |  | ⑩     |
| <i>g-ADL<sub>DFM</sub>-08-1</i> | <i>Glyma08g02210</i> | 3 | 20.9 | 0.68 | 84.4  |                                                       |       |  | ⑦/⑥   |
| <i>g-ADL<sub>DFM</sub>-08-2</i> | <i>Glyma08g15400</i> | 2 | 8.1  | 0.03 | 4.8   |                                                       |       |  | ⑩     |
| <i>g-ADL<sub>DFM</sub>-08-3</i> | <i>Glyma08g15870</i> | 2 | 31.1 | 1.45 | 168.7 |                                                       |       |  | ⑩     |
| <i>g-ADL<sub>DFM</sub>-08-4</i> | <i>Glyma08g23740</i> | 2 | 3.1  | 0.01 | 1.9   |                                                       |       |  | ⑥     |
| <i>g-ADL<sub>DFM</sub>-08-5</i> | <i>Glyma08g46480</i> | 2 | 15.1 | 0.22 | 29.1  | <i>E10</i> (1040.3Kb), <i>FT6</i> (1900.6Kb)          |       |  | ⑩     |
| <i>g-ADL<sub>DFM</sub>-09-1</i> | <i>Glyma09g05600</i> | 3 | 7.5  | 0.08 | 11.0  |                                                       |       |  | ⑧     |
| <i>g-ADL<sub>DFM</sub>-09-2</i> | <i>Glyma09g05830</i> | 3 | 4.4  | 0.02 | 2.8   |                                                       |       |  | ⑥     |
| <i>g-ADL<sub>DFM</sub>-09-3</i> | <i>Glyma09g07760</i> | 5 | 9.0  | 0.11 | 12.4  |                                                       |       |  | ⑩     |
| <i>g-ADL<sub>DFM</sub>-09-4</i> | <i>Glyma09g26100</i> | 2 | 3.3  | 0.01 | 2.4   | <i>TFL1.4</i> (675.2Kb)                               |       |  | ⑦/⑥   |
| <i>g-ADL<sub>DFM</sub>-09-5</i> | <i>Glyma09g31850</i> | 2 | 3.9  | 0.01 | 1.8   |                                                       |       |  | ②     |
| <i>g-ADL<sub>DFM</sub>-09-6</i> | <i>Glyma09g33010</i> | 2 | 18.9 | 0.44 | 57.6  |                                                       |       |  | ②     |
| <i>g-ADL<sub>DFM</sub>-09-7</i> | <i>Glyma09g33060</i> | 3 | 5.6  | 0.10 | 12.5  |                                                       |       |  | ①     |
| <i>g-ADL<sub>DFM</sub>-09-8</i> | <i>Glyma09g41010</i> | 2 | 8.0  | 0.09 | 12.5  |                                                       |       |  | ⑦/⑥   |
| <i>g-ADL<sub>DFM</sub>-10-1</i> | <i>Glyma10g05100</i> | 2 | 7.5  | 0.04 | 6.2   |                                                       |       |  | ⑩     |
| <i>g-ADL<sub>DFM</sub>-10-2</i> | <i>Glyma10g05451</i> | 2 | 9.6  | 0.12 | 16.3  |                                                       |       |  | ⑩     |
| <i>g-ADL<sub>DFM</sub>-10-3</i> | <i>Glyma10g07601</i> | 2 | 2.8  | 0.02 | 2.7   |                                                       |       |  | ④/⑤   |
| <i>g-ADL<sub>DFM</sub>-10-4</i> | <i>Glyma10g11480</i> | 2 | 8.9  | 0.12 | 16.4  |                                                       |       |  | ⑨     |
| <i>g-ADL<sub>DFM</sub>-10-5</i> | <i>Glyma10g17510</i> | 3 | 10.6 | 0.13 | 16.9  |                                                       |       |  | ⑩     |
| <i>g-ADL<sub>DFM</sub>-10-6</i> | <i>Glyma10g29970</i> | 4 | 20.8 | 0.97 | 115.0 | <i>PhyA1</i> (1707.7Kb)                               |       |  | ①/⑥   |
| <i>g-ADL<sub>DFM</sub>-10-7</i> | <i>Glyma10g36600</i> | 2 | 20.2 | 0.55 | 69.7  | <i>RAV</i> (1780.3Kb), <i>Rsl</i> 8-2, <i>Rsl</i> 9-2 |       |  | ⑤/②/① |
| <i>g-ADL<sub>DFM</sub>-10-8</i> | <i>Glyma10g42161</i> | 2 | 14.8 | 0.34 | 44.7  |                                                       |       |  | ④     |
| <i>g-ADL<sub>DFM</sub>-11-1</i> | <i>Glyma11g10600</i> | 4 | 7.7  | 0.10 | 12.9  |                                                       |       |  | ⑧     |
| <i>g-ADL<sub>DFM</sub>-11-2</i> | <i>Glyma11g10800</i> | 4 | 13.5 | 0.35 | 43.4  |                                                       |       |  | ⑩     |
| <i>g-ADL<sub>DFM</sub>-12-1</i> | <i>Glyma12g02340</i> | 3 | 14.3 | 0.14 | 18.5  |                                                       |       |  | ⑤     |
| <i>g-ADL<sub>DFM</sub>-12-2</i> | <i>Glyma12g06580</i> | 3 | 11.6 | 0.18 | 23.6  |                                                       |       |  | ⑧     |
| <i>g-ADL<sub>DFM</sub>-12-3</i> | <i>Glyma12g06950</i> | 2 | 2.0  | 0.01 | 1.7   |                                                       |       |  | ⑩     |
| <i>g-ADL<sub>DFM</sub>-12-4</i> | <i>Glyma12g08390</i> | 2 | 2.0  | 0.01 | 2.2   |                                                       |       |  | ⑨     |
| <i>g-ADL<sub>DFM</sub>-12-5</i> | <i>Glyma12g35580</i> | 2 | 17.8 | 0.62 | 78.1  |                                                       |       |  | ④     |
| <i>g-ADL<sub>DFM</sub>-13-1</i> | <i>Glyma13g09470</i> | 5 | 61.0 | 1.14 | 132.4 | 5.75                                                  | 307.7 |  | ⑩     |
| <i>g-ADL<sub>DFM</sub>-13-2</i> | <i>Glyma13g25020</i> | 5 | 7.0  | 0.05 | 5.4   |                                                       |       |  | ⑩     |
| <i>g-ADL<sub>DFM</sub>-13-3</i> | <i>Glyma13g25440</i> | 3 | 5.5  | 0.03 | 4.5   | <i>Rsl</i> 9-2                                        |       |  | ⑦     |
| <i>g-ADL<sub>DFM</sub>-13-4</i> | <i>Glyma13g25480</i> | 6 | 48.8 | 2.16 | 230.5 | 3.32                                                  | 316.4 |  | ④     |
| <i>g-ADL<sub>DFM</sub>-13-5</i> | <i>Glyma13g28880</i> | 4 | 13.2 | 0.34 | 42.0  |                                                       |       |  | ⑤/⑥   |
| <i>g-ADL<sub>DFM</sub>-13-6</i> | <i>Glyma13g34460</i> | 3 | 7.8  | 0.04 | 5.6   |                                                       |       |  | ⑤     |
| <i>g-ADL<sub>DFM</sub>-13-7</i> | <i>Glyma13g36310</i> | 2 | 1.8  | 0.02 | 3.0   |                                                       |       |  | ④     |
| <i>g-ADL<sub>DFM</sub>-14-1</i> | <i>Glyma14g13884</i> | 3 | 9.7  | 0.13 | 16.8  |                                                       |       |  | ⑧     |
| <i>g-ADL<sub>DFM</sub>-14-2</i> | <i>Glyma14g39230</i> | 2 | 7.7  | 0.09 | 12.8  |                                                       |       |  | ⑨     |
| <i>g-ADL<sub>DFM</sub>-15-1</i> | <i>Glyma15g08420</i> | 2 | 11.6 | 0.11 | 15.5  |                                                       |       |  | ⑧     |
| <i>g-ADL<sub>DFM</sub>-15-2</i> | <i>Glyma15g34653</i> | 4 | 20.4 | 0.36 | 44.7  |                                                       |       |  | ⑥     |
| <i>g-ADL<sub>DFM</sub>-16-1</i> | <i>Glyma16g03050</i> | 3 | 1.6  | 0.01 | 1.9   | <i>FT5A</i> (1469.9KB), <i>FT3A</i> (1496.7Kb)        |       |  | ②/⑦   |
| <i>g-ADL<sub>DFM</sub>-16-2</i> | <i>Glyma16g07920</i> | 5 | 9.5  | 0.05 | 5.8   | )                                                     |       |  | ④⑧    |
| <i>g-ADL<sub>DFM</sub>-16-3</i> | <i>Glyma16g21340</i> | 2 | 3.3  | 0.03 | 4.9   |                                                       |       |  | ①     |
| <i>g-ADL<sub>DFM</sub>-16-4</i> | <i>Glyma16g26070</i> | 3 | 13.7 | 0.23 | 29.2  | <i>FT2A</i> (500.9Kb), <i>FT2B</i> (539.8Kb)          |       |  | ⑧     |
| <i>g-ADL<sub>DFM</sub>-16-5</i> | <i>Glyma16g27521</i> | 5 | 24.0 | 1.38 | 157.6 |                                                       |       |  | ⑥     |
| <i>g-ADL<sub>DFM</sub>-16-6</i> | <i>Glyma16g29380</i> | 5 | 12.6 | 0.20 | 24.3  |                                                       |       |  | ⑩     |
| <i>g-ADL<sub>DFM</sub>-16-7</i> | <i>Glyma16g31862</i> | 6 | 6.1  | 0.05 | 4.9   | <i>BFT</i> (137.7Kb)                                  |       |  | ⑤     |
| <i>g-ADL<sub>DFM</sub>-16-8</i> | <i>Glyma16g33100</i> | 4 | 30.3 | 1.39 | 159.8 |                                                       |       |  | ⑧     |

|                                 |                      |           |       |       |        |                                       |        |
|---------------------------------|----------------------|-----------|-------|-------|--------|---------------------------------------|--------|
| <i>g-ADL<sub>DFM</sub>-17-1</i> | <i>Glyma17g01160</i> | 3         | 13.9  | 0.20  | 26.6   |                                       | ⑥      |
| <i>g-ADL<sub>DFM</sub>-17-2</i> | <i>Glyma17g02610</i> | 2         | 13.8  | 0.30  | 40.3   |                                       | ⑩      |
| <i>g-ADL<sub>DFM</sub>-17-3</i> | <i>Glyma17g04580</i> | 3         | 15.9  | 0.36  | 46.2   |                                       | ⑩      |
| <i>g-ADL<sub>DFM</sub>-17-4</i> | <i>Glyma17g07520</i> | 2         | 7.0   | 0.01  | 1.5    |                                       | ⑩      |
| <i>g-ADL<sub>DFM</sub>-17-5</i> | <i>Glyma17g19084</i> | 4         | 12.5  | 0.10  | 12.2   | <i>Rsl 5-2</i>                        | ②      |
| <i>g-ADL<sub>DFM</sub>-17-6</i> | <i>Glyma17g20091</i> | 2         | 3.6   | 0.02  | 2.7    |                                       | ⑩      |
| <i>g-ADL<sub>DFM</sub>-17-7</i> | <i>Glyma17g34420</i> | 2         | 5.9   | 0.02  | 3.9    |                                       | ⑩      |
| <i>g-ADL<sub>DFM</sub>-18-1</i> | <i>Glyma18g18230</i> | 3         | 11.6  | 0.10  | 13.0   |                                       | ⑩      |
| <i>g-ADL<sub>DFM</sub>-18-2</i> | <i>Glyma18g42375</i> | 5         | 18.7  | 0.43  | 52.7   | <i>Rp 1-3</i>                         | ⑤      |
| <i>g-ADL<sub>DFM</sub>-18-3</i> | <i>Glyma18g44761</i> | 4         | 19.9  | 0.86  | 103.0  | <i>Rsl 5-2</i>                        | ②/①/⑧  |
| <i>g-ADL<sub>DFM</sub>-18-4</i> | <i>Glyma18g45930</i> | 2         | 9.5   | 0.11  | 15.9   |                                       | ⑦      |
| <i>g-ADL<sub>DFM</sub>-18-5</i> | <i>Glyma18g51380</i> | 2         | 20.9  | 0.63  | 79.4   |                                       | ⑥      |
| <i>g-ADL<sub>DFM</sub>-18-6</i> | <i>Glyma18g53545</i> | 3         | 13.1  | 0.24  | 30.5   | <i>FT1A(85.1Kb), FT1B(101.9Kb)</i>    | ⑤/①    |
| <i>g-ADL<sub>DFM</sub>-19-1</i> | <i>Glyma19g03590</i> | 4         | 6.3   | 0.10  | 12.1   |                                       | ⑤/⑥    |
| <i>g-ADL<sub>DFM</sub>-19-2</i> | <i>Glyma19g23740</i> | 2         | 21.2  | 0.93  | 113.8  |                                       | ⑩      |
| <i>g-ADL<sub>DFM</sub>-19-3</i> | <i>Glyma19g25360</i> | 2         | 27.0  | 0.91  | 111.2  |                                       | ⑤/ ①/⑨ |
| <i>g-ADL<sub>DFM</sub>-19-4</i> | <i>Glyma19g30690</i> | 3         | 71.8  | 7.18  | 307.7  | <i>FT5B(2470.9Kb), FT3B(2489.9Kb)</i> | ⑩      |
| <i>g-ADL<sub>DFM</sub>-19-5</i> | <i>Glyma19g33210</i> | 3         | 6.3   | 0.02  | 2.9    |                                       | ⑥      |
| <i>g-ADL<sub>DFM</sub>-19-6</i> | <i>Glyma19g34740</i> | 2         | 44.6  | 2.67  | 280.3  | <i>,2033.9Kb), Rsl 5-6</i>            | ⑤/⑦    |
| <i>g-ADL<sub>DFM</sub>-19-7</i> | <i>Glyma19g40710</i> | 2         | 11.5  | 0.22  | 29.3   |                                       | ⑩      |
| <i>g-ADL<sub>DFM</sub>-20-1</i> | <i>Glyma20g02500</i> | 3         | 3.7   | 0.05  | 6.7    |                                       | ⑩      |
| <i>g-ADL<sub>DFM</sub>-20-2</i> | <i>Glyma20g03100</i> | 5         | 22.5  | 0.65  | 78.9   |                                       | ⑩      |
| <i>g-ADL<sub>DFM</sub>-20-3</i> | <i>Glyma20g23440</i> | 2         | 1.4   | 0.01  | 1.9    |                                       | ⑩      |
| <i>g-ADL<sub>DFM</sub>-20-4</i> | <i>Glyma20g25100</i> | 3         | 11.9  | 0.15  | 19.4   |                                       | ⑥      |
| <i>g-ADL<sub>DFM</sub>-20-5</i> | <i>Glyma20g26460</i> | 3         | 8.3   | 0.02  | 2.8    |                                       | ⑩      |
| <i>g-ADL<sub>DFM</sub>-20-6</i> | <i>Glyma20g27950</i> | 2         | 27.8  | 0.53  | 67.4   | 1.46 166.8                            | ⑧      |
| <i>g-ADL<sub>DFM</sub>-20-7</i> | <i>Glyma20g32390</i> | 3         | 15.3  | 0.42  | 53.2   | <i>GIGANTEA(1339.9Kb)</i>             | ⑧/⑨    |
| <i>g-ADL<sub>DFM</sub>-20-8</i> | <i>Glyma20g32540</i> | 2         | 3.3   | 0.02  | 2.9    |                                       | ⑤      |
| <i>g-ADL<sub>DFM</sub>-20-9</i> | <i>Glyma20g32720</i> | 3         | 5.5   | 0.07  | 9.3    |                                       | ⑩      |
| Total                           | 124                  | 364(2.94) | 50.24 | 20.36 | 33(23) |                                       | 154    |

Note: Gene code: for example, *g-ADL<sub>DFM</sub>-01-1*, where *ADL<sub>DFM</sub>* means DFM required accumulative day-length, -01 represents chromosome 1, and -1 represents its order on the chromosome according to its physical position. The position corresponds to the Williams 82 reference genome version 1 (Wm82.a1).

Reported QTL, the QTL name is simplified; for example, *Rp1-3* represents reproductive period 1-3 and *Rsl7-1* represents reproductive stage length 7-1. The same applies below. Gene group: Gene Ontology groups (please see the notes of Table S2 for details).



**Table S7** The gene–allele system conferring AAT<sub>DFM</sub> identified from GASM-RTM-GWAS in the WSGP.

| Gene Code                        | Genes                | Allele no. | Model P<br>-lg(P) | Main-effect |        | Gene×Env. |        | Known Genes/QTLs                     | Gene group |
|----------------------------------|----------------------|------------|-------------------|-------------|--------|-----------|--------|--------------------------------------|------------|
|                                  |                      |            |                   | R2          | -lg(P) | R2        | -lg(P) |                                      |            |
| <i>g-AAT<sub>DFM</sub>-01-1</i>  | <i>Glyma01g04515</i> | 2          | 2.2               | 0.02        | 3.9    |           |        |                                      | ⑩          |
| <i>g-AAT<sub>DFM</sub>-01-2</i>  | <i>Glyma01g28850</i> | 2          | 12.1              | 0.05        | 8.9    |           |        |                                      | ⑩          |
| <i>g-AAT<sub>DFM</sub>-01-3</i>  | <i>Glyma01g43900</i> | 3          | 9.1               | 0.09        | 13.6   |           |        |                                      | ⑥/⑧        |
| <i>g-AAT<sub>DFM</sub>-02-1</i>  | <i>Glyma02g00371</i> | 4          | 50.9              | 1.33        | 174.7  | 3.80      | 307.7  | <i>Rsl 7-1</i>                       | ⑧          |
| <i>g-AAT<sub>DFM</sub>-02-2</i>  | <i>Glyma02g01540</i> | 2          | 18.1              | 0.67        | 95.7   |           |        |                                      | ④/⑤/⑥      |
| <i>g-AAT<sub>DFM</sub>-02-3</i>  | <i>Glyma02g05550</i> | 5          | 6.6               | 0.06        | 8.4    |           |        |                                      | ⑧          |
| <i>g-AAT<sub>DFM</sub>-02-4</i>  | <i>Glyma02g06730</i> | 4          | 14.6              | 0.22        | 31.8   |           |        |                                      | ⑤/①        |
| <i>g-AAT<sub>DFM</sub>-02-5</i>  | <i>Glyma02g06841</i> | 2          | 36.8              | 1.56        | 203.2  | 1.08      | 145.5  |                                      | ⑩          |
| <i>g-AAT<sub>DFM</sub>-02-6</i>  | <i>Glyma02g08430</i> | 3          | 19.1              | 0.28        | 42.1   |           |        |                                      | ⑥          |
| <i>g-AAT<sub>DFM</sub>-02-7</i>  | <i>Glyma02g15470</i> | 3          | 7.7               | 0.05        | 8.3    |           |        |                                      | ⑩          |
| <i>g-AAT<sub>DFM</sub>-02-8</i>  | <i>Glyma02g19000</i> | 2          | 1.7               | 0.01        | 2.3    |           |        | <i>FLD</i> (443.3Kb)                 | ⑤/⑦        |
| <i>g-AAT<sub>DFM</sub>-02-9</i>  | <i>Glyma02g42290</i> | 2          | 16.0              | 0.33        | 50.5   |           |        |                                      | ⑦          |
| <i>g-AAT<sub>DFM</sub>-02-10</i> | <i>Glyma02g46400</i> | 2          | 3.5               | 0.01        | 1.9    |           |        |                                      | ⑩          |
| <i>g-AAT<sub>DFM</sub>-03-1</i>  | <i>Glyma03g05120</i> | 2          | 39.9              | 0.80        | 112.7  | 3.15      | 307.7  |                                      | ⑩          |
| <i>g-AAT<sub>DFM</sub>-03-2</i>  | <i>Glyma03g18725</i> | 5          | 3.6               | 0.05        | 6.9    |           |        |                                      | ⑩          |
| <i>g-AAT<sub>DFM</sub>-03-3</i>  | <i>Glyma03g20420</i> | 2          | 1.6               | 0.01        | 2.3    |           |        |                                      | ⑥          |
| <i>g-AAT<sub>DFM</sub>-03-4</i>  | <i>Glyma03g29010</i> | 4          | 23.2              | 1.20        | 158.9  | 0.41      | 53.5   |                                      | ⑥          |
| <i>g-AAT<sub>DFM</sub>-03-5</i>  | <i>Glyma03g29060</i> | 3          | 5.5               | 0.03        | 4.6    |           |        |                                      | ⑩          |
| <i>g-AAT<sub>DFM</sub>-03-6</i>  | <i>Glyma03g34900</i> | 2          | 19.0              | 0.70        | 100.6  |           |        | <i>Dt1</i> ( <i>TFLIA</i> , 326.8Kb) | ⑤/③        |
| <i>g-AAT<sub>DFM</sub>-04-1</i>  | <i>Glyma04g02980</i> | 3          | 4.3               | 0.02        | 3.6    |           |        |                                      | ⑤/①        |
| <i>g-AAT<sub>DFM</sub>-04-2</i>  | <i>Glyma04g06240</i> | 4          | 12.2              | 0.20        | 29.5   |           |        | <i>J</i> ( <i>ELF3A</i> , 742.0Kb)   | ⑤/⑦        |
| <i>g-AAT<sub>DFM</sub>-04-3</i>  | <i>Glyma04g16100</i> | 6          | 7.9               | 0.02        | 2.2    |           |        |                                      | ①          |
| <i>g-AAT<sub>DFM</sub>-04-4</i>  | <i>Glyma04g20400</i> | 4          | 9.4               | 0.04        | 6.2    |           |        |                                      | ⑩          |
| <i>g-AAT<sub>DFM</sub>-04-5</i>  | <i>Glyma04g36790</i> | 2          | 1.4               | 0.01        | 2.8    |           |        |                                      | ⑦          |
| <i>g-AAT<sub>DFM</sub>-04-6</i>  | <i>Glyma04g38955</i> | 3          | 11.4              | 0.13        | 18.9   |           |        |                                      | ⑤/⑥        |
| <i>g-AAT<sub>DFM</sub>-04-7</i>  | <i>Glyma04g40310</i> | 2          | 17.5              | 0.50        | 73.9   |           |        |                                      | ⑤/①        |
| <i>g-AAT<sub>DFM</sub>-04-8</i>  | <i>Glyma04g42010</i> | 3          | 13.2              | 0.19        | 29.1   |           |        |                                      | ⑨          |
| <i>g-AAT<sub>DFM</sub>-05-1</i>  | <i>Glyma05g01943</i> | 3          | 7.9               | 0.08        | 11.4   |           |        |                                      | ⑩          |
| <i>g-AAT<sub>DFM</sub>-05-2</i>  | <i>Glyma05g04561</i> | 2          | 18.5              | 0.58        | 84.5   |           |        |                                      | ⑩          |
| <i>g-AAT<sub>DFM</sub>-05-3</i>  | <i>Glyma05g25485</i> | 2          | 4.5               | 0.01        | 1.8    |           |        |                                      | ⑩          |
| <i>g-AAT<sub>DFM</sub>-05-4</i>  | <i>Glyma05g26620</i> | 2          | 5.2               | 0.01        | 2.5    |           |        | <i>FLC</i> (1454.9Kb)                | ④/⑧        |
| <i>g-AAT<sub>DFM</sub>-06-1</i>  | <i>Glyma06g11120</i> | 2          | 5.7               | 0.04        | 7.3    |           |        |                                      | ⑦/⑧        |
| <i>g-AAT<sub>DFM</sub>-06-2</i>  | <i>Glyma06g15390</i> | 2          | 8.4               | 0.16        | 25.3   |           |        | <i>WRKY76</i> (598.7Kb)              | ⑩          |
| <i>g-AAT<sub>DFM</sub>-06-3</i>  | <i>Glyma06g17390</i> | 3          | 27.7              | 1.34        | 176.3  | 1.43      | 181.9  |                                      | ⑩          |
| <i>g-AAT<sub>DFM</sub>-06-4</i>  | <i>Glyma06g17451</i> | 2          | 1.6               | 0.01        | 2.4    |           |        |                                      | ⑩          |
| <i>g-AAT<sub>DFM</sub>-06-5</i>  | <i>Glyma06g19380</i> | 2          | 17.5              | 0.18        | 27.8   |           |        |                                      | ⑩          |
| <i>g-AAT<sub>DFM</sub>-06-6</i>  | <i>Glyma06g19480</i> | 2          | 17.8              | 0.36        | 54.5   |           |        |                                      | ②/⑦/⑨      |
| <i>g-AAT<sub>DFM</sub>-06-7</i>  | <i>Glyma06g40560</i> | 3          | 2.9               | 0.02        | 2.6    |           |        |                                      | ⑧          |
| <i>g-AAT<sub>DFM</sub>-06-8</i>  | <i>Glyma06g48393</i> | 3          | 35.2              | 0.70        | 98.5   | 2.52      | 292.8  |                                      | ⑩          |
| <i>g-AAT<sub>DFM</sub>-07-1</i>  | <i>Glyma07g04800</i> | 2          | 16.6              | 0.34        | 51.7   |           |        |                                      | ⑤/⑧        |
| <i>g-AAT<sub>DFM</sub>-07-2</i>  | <i>Glyma07g06420</i> | 4          | 19.1              | 0.60        | 84.3   | 0.49      | 64.1   | <i>Rsl 1-2</i> , <i>Rsl 5-4</i>      | ②          |
| <i>g-AAT<sub>DFM</sub>-07-3</i>  | <i>Glyma07g10541</i> | 3          | 5.9               | 0.03        | 5.0    |           |        |                                      | ⑧          |
| <i>g-AAT<sub>DFM</sub>-07-4</i>  | <i>Glyma07g17620</i> | 2          | 4.0               | 0.02        | 3.5    |           |        |                                      | ⑩          |
| <i>g-AAT<sub>DFM</sub>-07-5</i>  | <i>Glyma07g29650</i> | 2          | 15.3              | 0.17        | 26.0   |           |        |                                      | ⑨          |
| <i>g-AAT<sub>DFM</sub>-07-6</i>  | <i>Glyma07g34820</i> | 2          | 10.0              | 0.14        | 21.5   |           |        |                                      | ⑩          |
| <i>g-AAT<sub>DFM</sub>-07-7</i>  | <i>Glyma07g40260</i> | 2          | 22.2              | 0.57        | 82.4   | 0.51      | 72.9   |                                      | ⑩          |
| <i>g-AAT<sub>DFM</sub>-08-1</i>  | <i>Glyma08g07050</i> | 2          | 8.2               | 0.07        | 11.3   |           |        |                                      | ⑧          |

|                                  |                      |   |       |      |       |      |       |                         |       |
|----------------------------------|----------------------|---|-------|------|-------|------|-------|-------------------------|-------|
| <i>g-AAT<sub>DFM</sub>-08-2</i>  | <i>Glyma08g11480</i> | 5 | 22.5  | 0.94 | 126.8 | 0.95 | 120.3 |                         | ④/⑧   |
| <i>g-AAT<sub>DFM</sub>-08-3</i>  | <i>Glyma08g15050</i> | 2 | 2.4   | 0.03 | 5.5   |      |       |                         | ⑤/⑦   |
| <i>g-AAT<sub>DFM</sub>-08-4</i>  | <i>Glyma08g15400</i> | 2 | 7.5   | 0.10 | 15.5  |      |       |                         | ⑩     |
| <i>g-AAT<sub>DFM</sub>-08-5</i>  | <i>Glyma08g15870</i> | 2 | 30.0  | 1.27 | 170.4 | 1.00 | 135.6 |                         | ⑩     |
| <i>g-AAT<sub>DFM</sub>-08-6</i>  | <i>Glyma08g24100</i> | 4 | 10.2  | 0.11 | 16.2  |      |       |                         | ⑩     |
| <i>g-AAT<sub>DFM</sub>-08-7</i>  | <i>Glyma08g44170</i> | 2 | 16.9  | 0.22 | 34.7  |      |       | <i>E10</i> (2700.7Kb),  | ⑩     |
| <i>g-AAT<sub>DFM</sub>-09-1</i>  | <i>Glyma09g26970</i> | 2 | 3.4   | 0.01 | 1.3   |      |       | <i>TFL1.4</i> (589.8Kb) | ①     |
| <i>g-AAT<sub>DFM</sub>-09-2</i>  | <i>Glyma09g33737</i> | 2 | 2.2   | 0.01 | 2.7   |      |       |                         | ⑧     |
| <i>g-AAT<sub>DFM</sub>-09-3</i>  | <i>Glyma09g41740</i> | 4 | 7.6   | 0.09 | 13.0  |      |       |                         | ⑥     |
| <i>g-AAT<sub>DFM</sub>-10-1</i>  | <i>Glyma10g05051</i> | 5 | 11.9  | 0.19 | 26.2  |      |       |                         | ①     |
| <i>g-AAT<sub>DFM</sub>-10-2</i>  | <i>Glyma10g05600</i> | 2 | 8.9   | 0.12 | 19.1  |      |       |                         | ⑧     |
| <i>g-AAT<sub>DFM</sub>-10-3</i>  | <i>Glyma10g28380</i> | 3 | 6.6   | 0.06 | 8.9   |      |       | <i>PhyA1</i> (315Kb)    | ⑤     |
| <i>g-AAT<sub>DFM</sub>-10-4</i>  | <i>Glyma10g30930</i> | 3 | 11.9  | 0.16 | 24.3  |      |       |                         | ⑩     |
| <i>g-AAT<sub>DFM</sub>-10-5</i>  | <i>Glyma10g31570</i> | 3 | 9.8   | 0.06 | 8.5   |      |       |                         | ⑤/⑨   |
| <i>g-AAT<sub>DFM</sub>-11-1</i>  | <i>Glyma11g06565</i> | 3 | 4.6   | 0.05 | 7.5   |      |       |                         | ⑧     |
| <i>g-AAT<sub>DFM</sub>-11-2</i>  | <i>Glyma11g09940</i> | 2 | 4.7   | 0.02 | 4.1   |      |       |                         | ④/①   |
| <i>g-AAT<sub>DFM</sub>-11-3</i>  | <i>Glyma11g10430</i> | 2 | 3.3   | 0.02 | 3.9   |      |       |                         | ⑩     |
| <i>g-AAT<sub>DFM</sub>-11-4</i>  | <i>Glyma11g13111</i> | 2 | 9.0   | 0.12 | 19.0  |      |       |                         | ⑩     |
| <i>g-AAT<sub>DFM</sub>-11-5</i>  | <i>Glyma11g14500</i> | 3 | 9.5   | 0.14 | 20.7  |      |       |                         | ⑩     |
| <i>g-AAT<sub>DFM</sub>-11-6</i>  | <i>Glyma11g17930</i> | 2 | 22.2  | 0.69 | 98.9  | 0.51 | 72.5  | <i>Rsl 8-1</i>          | ③/⑧   |
| <i>g-AAT<sub>DFM</sub>-11-7</i>  | <i>Glyma11g20520</i> | 3 | 15.9  | 0.24 | 35.8  |      |       |                         | ⑤     |
| <i>g-AAT<sub>DFM</sub>-12-1</i>  | <i>Glyma12g02800</i> | 2 | 19.2  | 0.46 | 67.5  |      |       |                         | ⑩     |
| <i>g-AAT<sub>DFM</sub>-12-2</i>  | <i>Glyma12g06580</i> | 3 | 15.0  | 0.28 | 41.3  |      |       |                         | ⑧     |
| <i>g-AAT<sub>DFM</sub>-12-3</i>  | <i>Glyma12g06620</i> | 2 | 12.8  | 0.15 | 23.6  |      |       |                         | ⑧     |
| <i>g-AAT<sub>DFM</sub>-12-4</i>  | <i>Glyma12g06950</i> | 2 | 14.9  | 0.15 | 23.1  |      |       |                         | ①     |
| <i>g-AAT<sub>DFM</sub>-12-5</i>  | <i>Glyma12g08100</i> | 5 | 20.7  | 0.81 | 111.0 | 0.45 | 55.9  |                         | ⑤/⑧   |
| <i>g-AAT<sub>DFM</sub>-12-6</i>  | <i>Glyma12g08170</i> | 4 | 12.0  | 0.14 | 20.5  |      |       |                         | ④/⑤/① |
| <i>g-AAT<sub>DFM</sub>-13-1</i>  | <i>Glyma13g00960</i> | 2 | 16.5  | 0.19 | 30.2  |      |       |                         | ⑤     |
| <i>g-AAT<sub>DFM</sub>-13-2</i>  | <i>Glyma13g09470</i> | 5 | 114.2 | 1.27 | 166.0 |      |       |                         | ⑩     |
| <i>g-AAT<sub>DFM</sub>-13-3</i>  | <i>Glyma13g22100</i> | 2 | 11.4  | 0.14 | 22.2  |      |       | <i>Rsl 4-4, Rsl 7-2</i> | ⑥     |
| <i>g-AAT<sub>DFM</sub>-13-4</i>  | <i>Glyma13g22420</i> | 2 | 16.7  | 0.26 | 40.2  |      |       |                         | ④/⑤   |
| <i>g-AAT<sub>DFM</sub>-13-5</i>  | <i>Glyma13g22855</i> | 3 | 6.3   | 0.05 | 7.2   |      |       |                         | ①     |
| <i>g-AAT<sub>DFM</sub>-13-6</i>  | <i>Glyma13g24820</i> | 4 | 19.3  | 0.46 | 65.7  | 0.41 | 53.1  |                         | ⑩     |
| <i>g-AAT<sub>DFM</sub>-13-7</i>  | <i>Glyma13g25480</i> | 6 | 84.0  | 3.07 | 307.7 | 6.71 | 307.7 |                         | ④     |
| <i>g-AAT<sub>DFM</sub>-13-8</i>  | <i>Glyma13g28260</i> | 3 | 10.8  | 0.18 | 27.1  |      |       |                         | ⑩     |
| <i>g-AAT<sub>DFM</sub>-13-9</i>  | <i>Glyma13g29160</i> | 4 | 18.4  | 0.50 | 70.6  | 0.44 | 58.0  |                         | ⑤     |
| <i>g-AAT<sub>DFM</sub>-13-10</i> | <i>Glyma13g43980</i> | 3 | 8.3   | 0.08 | 12.0  |      |       |                         | ⑩     |
| <i>g-AAT<sub>DFM</sub>-14-1</i>  | <i>Glyma14g01300</i> | 2 | 18.9  | 0.45 | 66.8  |      |       |                         | ②     |
| <i>g-AAT<sub>DFM</sub>-14-2</i>  | <i>Glyma14g02780</i> | 3 | 11.1  | 0.08 | 12.2  |      |       |                         | ⑤     |
| <i>g-AAT<sub>DFM</sub>-14-3</i>  | <i>Glyma14g04930</i> | 3 | 14.1  | 0.23 | 34.8  |      |       |                         | ⑤     |
| <i>g-AAT<sub>DFM</sub>-14-4</i>  | <i>Glyma14g05140</i> | 2 | 7.8   | 0.07 | 11.2  |      |       |                         | ⑩     |
| <i>g-AAT<sub>DFM</sub>-14-5</i>  | <i>Glyma14g06485</i> | 2 | 11.7  | 0.04 | 6.7   |      |       |                         | ②     |
| <i>g-AAT<sub>DFM</sub>-14-6</i>  | <i>Glyma14g08990</i> | 2 | 13.9  | 0.20 | 31.4  |      |       |                         | ⑩     |
| <i>g-AAT<sub>DFM</sub>-14-7</i>  | <i>Glyma14g09160</i> | 3 | 28.3  | 0.13 | 19.9  | 2.37 | 279.0 |                         | ⑤     |
| <i>g-AAT<sub>DFM</sub>-14-8</i>  | <i>Glyma14g13178</i> | 3 | 5.0   | 0.03 | 5.2   |      |       |                         | ①     |
| <i>g-AAT<sub>DFM</sub>-14-9</i>  | <i>Glyma14g37230</i> | 2 | 18.7  | 0.36 | 53.4  |      |       |                         | ②     |
| <i>g-AAT<sub>DFM</sub>-14-10</i> | <i>Glyma14g38570</i> | 5 | 8.4   | 0.05 | 5.8   |      |       |                         | ⑩     |
| <i>g-AAT<sub>DFM</sub>-15-1</i>  | <i>Glyma15g02740</i> | 3 | 18.6  | 0.42 | 61.0  |      |       |                         | ⑤     |
| <i>g-AAT<sub>DFM</sub>-15-2</i>  | <i>Glyma15g09930</i> | 2 | 1.4   | 0.01 | 1.6   |      |       |                         | ⑩     |
| <i>g-AAT<sub>DFM</sub>-15-3</i>  | <i>Glyma15g14040</i> | 2 | 6.0   | 0.01 | 1.7   |      |       |                         | ⑩     |

|                                 |                      |           |      |       |       |       |       |                                                     |     |
|---------------------------------|----------------------|-----------|------|-------|-------|-------|-------|-----------------------------------------------------|-----|
| <i>g-AAT<sub>DFM</sub>-15-4</i> | <i>Glyma15g15105</i> | 3         | 24.2 | 0.98  | 134.3 | 1.14  | 148.9 |                                                     | ⑦   |
| <i>g-AAT<sub>DFM</sub>-15-5</i> | <i>Glyma15g16183</i> | 2         | 11.4 | 0.19  | 29.0  |       |       |                                                     | ⑩   |
| <i>g-AAT<sub>DFM</sub>-15-6</i> | <i>Glyma15g18280</i> | 3         | 2.3  | 0.01  | 1.9   |       |       |                                                     | ⑩   |
| <i>g-AAT<sub>DFM</sub>-16-1</i> | <i>Glyma16g07081</i> | 2         | 7.3  | 0.04  | 6.2   |       |       |                                                     | ⑩   |
| <i>g-AAT<sub>DFM</sub>-16-2</i> | <i>Glyma16g25500</i> | 2         | 23.9 | 0.99  | 136.9 |       |       | <i>E9</i> (1225.6Kb), <i>FT2B</i> (1264.5Kb)        | ⑩   |
| <i>g-AAT<sub>DFM</sub>-16-3</i> | <i>Glyma16g28900</i> | 6         | 11.7 | 0.17  | 22.9  |       |       |                                                     | ⑥   |
| <i>g-AAT<sub>DFM</sub>-16-4</i> | <i>Glyma16g32900</i> | 2         | 8.0  | 0.06  | 10.2  |       |       | <i>TFL1.3</i> (728.9Kb)                             | ⑧   |
| <i>g-AAT<sub>DFM</sub>-16-5</i> | <i>Glyma16g33100</i> | 4         | 18.2 | 0.48  | 68.4  | 0.60  | 79.3  |                                                     | ⑧   |
| <i>g-AAT<sub>DFM</sub>-16-6</i> | <i>Glyma16g33490</i> | 2         | 9.3  | 0.03  | 4.7   |       |       |                                                     | ⑥   |
| <i>g-AAT<sub>DFM</sub>-17-1</i> | <i>Glyma17g01160</i> | 3         | 15.1 | 0.05  | 7.7   |       |       |                                                     | ⑥   |
| <i>g-AAT<sub>DFM</sub>-17-2</i> | <i>Glyma17g03310</i> | 2         | 9.8  | 0.07  | 11.5  |       |       |                                                     | ⑤   |
| <i>g-AAT<sub>DFM</sub>-17-3</i> | <i>Glyma17g03700</i> | 3         | 7.2  | 0.02  | 2.9   |       |       |                                                     | ①/⑦ |
| <i>g-AAT<sub>DFM</sub>-17-4</i> | <i>Glyma17g13260</i> | 2         | 6.0  | 0.02  | 3.3   |       |       | <i>GmYABBY16</i> (1308.5Kb)                         | ⑤   |
| <i>g-AAT<sub>DFM</sub>-17-5</i> | <i>Glyma17g19084</i> | 4         | 4.7  | 0.04  | 6.2   |       |       | <i>Rp 1-7</i>                                       | ②/① |
| <i>g-AAT<sub>DFM</sub>-17-6</i> | <i>Glyma17g33290</i> | 2         | 1.3  | 0.01  | 2.0   |       |       |                                                     | ⑩   |
| <i>g-AAT<sub>DFM</sub>-17-7</i> | <i>Glyma17g35000</i> | 3         | 21.1 | 0.65  | 91.8  | 0.46  | 62.7  |                                                     | ⑥   |
| <i>g-AAT<sub>DFM</sub>-18-1</i> | <i>Glyma18g32696</i> | 2         | 1.8  | 0.01  | 2.7   |       |       | <i>Rp 1-3</i>                                       | ⑤   |
| <i>g-AAT<sub>DFM</sub>-18-2</i> | <i>Glyma18g51230</i> | 3         | 9.7  | 0.01  | 1.3   |       |       |                                                     | ⑥   |
| <i>g-AAT<sub>DFM</sub>-18-3</i> | <i>Glyma18g51970</i> | 5         | 18.3 | 0.56  | 77.9  |       |       |                                                     | ⑨   |
| <i>g-AAT<sub>DFM</sub>-18-4</i> | <i>Glyma18g53770</i> | 3         | 19.6 | 0.31  | 45.5  |       |       | <i>FT1B</i> (84.4Kb), <i>FT1A</i> (98.2Kb)          | ⑩   |
| <i>g-AAT<sub>DFM</sub>-19-1</i> | <i>Glyma19g09700</i> | 2         | 21.9 | 0.65  | 93.3  |       |       |                                                     | ⑩   |
| <i>g-AAT<sub>DFM</sub>-19-2</i> | <i>Glyma19g18581</i> | 3         | 6.6  | 0.01  | 1.5   |       |       |                                                     | ⑦/⑧ |
| <i>g-AAT<sub>DFM</sub>-19-3</i> | <i>Glyma19g30750</i> | 2         | 59.2 | 5.71  | 307.7 |       |       | <i>FT5B</i> (2509.1Kb), <i>FT3B</i> (2528.1         | ⑩   |
| <i>g-AAT<sub>DFM</sub>-19-4</i> | <i>Glyma19g32540</i> | 3         | 8.8  | 0.09  | 13.0  |       |       |                                                     | ⑩   |
| <i>g-AAT<sub>DFM</sub>-19-5</i> | <i>Glyma19g33000</i> | 3         | 12.4 | 0.23  | 33.8  |       |       |                                                     | ⑧   |
| <i>g-AAT<sub>DFM</sub>-19-6</i> | <i>Glyma19g34740</i> | 2         | 17.9 | 0.69  | 98.2  | 0.43  | 61.9  | <i>Dt1</i> ( <i>TFL1b</i> ,326.8Kb), <i>Rsl 5-6</i> | ⑤/⑦ |
| <i>g-AAT<sub>DFM</sub>-20-1</i> | <i>Glyma20g01960</i> | 3         | 10.8 | 0.06  | 9.4   |       |       |                                                     | ⑩   |
| <i>g-AAT<sub>DFM</sub>-20-2</i> | <i>Glyma20g23960</i> | 3         | 7.4  | 0.08  | 11.4  |       |       |                                                     | ⑩   |
| <i>g-AAT<sub>DFM</sub>-20-3</i> | <i>Glyma20g30150</i> | 2         | 2.4  | 0.01  | 2.9   |       |       |                                                     | ⑤   |
| <i>g-AAT<sub>DFM</sub>-20-4</i> | <i>Glyma20g31060</i> | 3         | 3.3  | 0.03  | 4.6   |       |       | <i>GIGANTEA</i> (78.9Kb)                            | ⑩   |
| <i>g-AAT<sub>DFM</sub>-20-5</i> | <i>Glyma20g34860</i> | 4         | 8.2  | 0.13  | 18.4  |       |       |                                                     | ⑥   |
| <i>g-AAT<sub>DFM</sub>-20-6</i> | <i>Glyma20g36400</i> | 2         | 14.2 | 0.22  | 34.1  |       |       |                                                     | ⑩   |
| Total                           | 129                  | 362(2.81) |      | 41.54 |       | 28.86 |       | 28(22)                                              | 157 |

Note: Gene code: for example, *g-AAT<sub>DFM</sub>-01-1*, where *AAT<sub>DFM</sub>* means DFM required accumulative active temperature, -01 represents chromosome 1, and -1 represents its order on the chromosome according to its physical position. The position corresponds to the Williams 82 reference genome version 1 (Wm82.a1).

Reported QTL, the QTL name is simplified; for example, *Rp1-3* represents reproductive period 1-3 and *Rsl7-1* represents reproductive stage length 7-1. The same applies below. Gene group: Gene Ontology groups (please see the notes of Table S2 for details).

**Table S8** The summary of gene–allele systems of six DSF- and DFM-related traits identified from GASM-RTM-GWAS in the WSGP.

| Gene                 | GASM                                 | Start<br>position | End<br>position | Allele<br>no. | DSF<br>gene code   | ADL <sub>DSF</sub><br>gene code | AAT <sub>DSF</sub><br>gene code | DFM<br>gene code  | ADL <sub>DFM</sub><br>gene code | AAT <sub>DFM</sub><br>gene code  | Gene<br>group |
|----------------------|--------------------------------------|-------------------|-----------------|---------------|--------------------|---------------------------------|---------------------------------|-------------------|---------------------------------|----------------------------------|---------------|
| <i>Glyma01g01950</i> | 1_1521070_Block_1_1520440_1523995    | 1520440           | 1523995         | 2             | /                  | <i>g-ADL<sub>DSF</sub>-01-1</i> | /                               | /                 | /                               | /                                | ⑩             |
| <i>Glyma01g02525</i> | Block_1_2038299_2054214              | 2038299           | 2054214         | 4             | /                  | /                               | /                               | /                 | <i>g-ADL<sub>DFM</sub>-01-1</i> | /                                | ⑤/(⑦)/⑨       |
| <i>Glyma01g02580</i> | 1_2122200_Block_1_2119857_2122838    | 2119857           | 2122838         | 2             | /                  | /                               | <i>g-AAT<sub>DSF</sub>-01-1</i> | /                 | /                               | /                                | ⑥             |
| <i>Glyma01g02780</i> | 1_2278486_Block_1_2274286_2279870    | 2274286           | 2279870         | 2             | /                  | /                               | /                               | <i>g-DFM-01-1</i> | /                               | /                                | ⑧             |
| <i>Glyma01g03040</i> | 1_2531683_Block_1_2530563_2537849    | 2530563           | 2537849         | 2             | <i>g-DSF-01-1</i>  | /                               | /                               | /                 | /                               | /                                | ⑧             |
| <i>Glyma01g04100</i> | 1_3567141_Block_1_3565110_3567816    | 3565110           | 3567816         | 2             | /                  | <i>g-ADL<sub>DSF</sub>-01-2</i> | /                               | /                 | /                               | /                                | ⑨             |
| <i>Glyma01g04515</i> | 1_4094173_Block_1_4094046_4096371    | 4094046           | 4096371         | 2             | /                  | /                               | /                               | /                 | /                               | <i>g-AAT<sub>DFM</sub>-01-1</i>  | ⑩             |
| <i>Glyma01g06270</i> | Block_1_6353279_6357024              | 6353279           | 6357024         | 3             | /                  | /                               | <i>g-AAT<sub>DSF</sub>-01-2</i> | /                 | /                               | /                                | ⑩             |
| <i>Glyma01g22830</i> | 1_28986451_Block_1_28986403_28988037 | 28986403          | 28988037        | 2             | <i>g-DSF-01-2</i>  | <i>g-ADL<sub>DSF</sub>-01-3</i> | <i>g-AAT<sub>DSF</sub>-01-3</i> | /                 | /                               | /                                | ⑤             |
| <i>Glyma01g28850</i> | Block_1_38758938_38772979            | 38758938          | 38772979        | 2             | /                  | /                               | /                               | /                 | /                               | <i>g-AAT<sub>DFM</sub>-01-2</i>  | ⑩             |
| <i>Glyma01g33986</i> | 1_46305785_Block_1_46305208_46307924 | 46305208          | 46307924        | 2             | /                  | /                               | /                               | /                 | <i>g-ADL<sub>DFM</sub>-01-2</i> | /                                | ②/(⑧)         |
| <i>Glyma01g34630</i> | Block_1_47059947_47069275            | 47059947          | 47069275        | 2             | <i>g-DSF-01-3</i>  | /                               | /                               | /                 | /                               | /                                | ⑧             |
| <i>Glyma01g35820</i> | 1_48322127_Block_1_48321787_48329293 | 48321787          | 48329293        | 2             | <i>g-DSF-01-4</i>  | /                               | /                               | /                 | /                               | /                                | ⑥             |
| <i>Glyma01g36545</i> | Block_1_49022249_49027494            | 49022249          | 49027494        | 3             | /                  | /                               | /                               | /                 | <i>g-ADL<sub>DFM</sub>-01-3</i> | /                                | ⑩             |
| <i>Glyma01g40930</i> | 1_52587720_Block_1_52587536_52590299 | 52587536          | 52590299        | 2             | /                  | <i>g-ADL<sub>DSF</sub>-01-4</i> | /                               | /                 | /                               | /                                | ⑥             |
| <i>Glyma01g41520</i> | 1_52993005_Block_1_52991945_52993448 | 52991945          | 52993448        | 2             | <i>g-DSF-01-5</i>  | /                               | /                               | /                 | /                               | /                                | ⑤/(⑥)/(⑦)     |
| <i>Glyma01g43400</i> | Block_1_54425016_54426043            | 54425016          | 54426043        | 4             | <i>g-DSF-01-6</i>  | /                               | /                               | /                 | /                               | /                                | ⑩             |
| <i>Glyma01g43900</i> | Block_1_54755183_54767332            | 54755183          | 54767332        | 3             | /                  | /                               | /                               | /                 | /                               | <i>g-AAT<sub>DFM</sub>-01-3</i>  | ⑥/(⑧)         |
| <i>Glyma02g00371</i> | Block_2_156925_162109                | 156925            | 162109          | 4             | /                  | <i>g-ADL<sub>DSF</sub>-02-1</i> | /                               | <i>g-DFM-02-1</i> | <i>g-ADL<sub>DFM</sub>-02-1</i> | <i>g-AAT<sub>DFM</sub>-02-1</i>  | ⑧             |
| <i>Glyma02g01540</i> | 2_1101114_Block_2_1100819_1110176    | 1100819           | 1110176         | 2             | /                  | /                               | /                               | /                 | /                               | <i>g-AAT<sub>DFM</sub>-02-2</i>  | ④/(⑤)/(⑥)     |
| <i>Glyma02g03670</i> | 2_2892277_Block_2_2890415_2895159    | 2890415           | 2895159         | 2             | /                  | /                               | /                               | <i>g-DFM-02-2</i> | /                               | /                                | ①/(⑧)/(⑨)     |
| <i>Glyma02g03920</i> | 2_3133080_Block_2_3130868_3137826    | 3130868           | 3137826         | 2             | <i>g-DSF-02-1</i>  | /                               | <i>g-AAT<sub>DSF</sub>-02-1</i> | /                 | /                               | /                                | ⑩             |
| <i>Glyma02g04010</i> | 2_3224287_Block_2_3220822_3226910    | 3220822           | 3226910         | 2             | <i>g-DSF-02-2</i>  | /                               | /                               | /                 | /                               | /                                | ⑧             |
| <i>Glyma02g04190</i> | Block_2_3380678_3390117              | 3380678           | 3390117         | 3             | <i>g-DSF-02-3</i>  | <i>g-ADL<sub>DSF</sub>-02-2</i> | <i>g-AAT<sub>DSF</sub>-02-2</i> | /                 | /                               | /                                | ⑤/(⑧)         |
| <i>Glyma02g05550</i> | Block_2_4438431_4443610              | 4438431           | 4443610         | 5             | /                  | /                               | /                               | /                 | /                               | <i>g-AAT<sub>DFM</sub>-02-3</i>  | ⑧             |
| <i>Glyma02g06420</i> | Block_2_5115581_5120689              | 5115581           | 5120689         | 3             | <i>g-DSF-02-4</i>  | /                               | /                               | /                 | /                               | /                                | ⑤/(⑧)         |
| <i>Glyma02g06530</i> | 2_5207131_Block_2_5206527_5208734    | 5206527           | 5208734         | 2             | /                  | /                               | <i>g-AAT<sub>DSF</sub>-02-3</i> | /                 | /                               | /                                | ⑤             |
| <i>Glyma02g06730</i> | Block_2_5373078_5381786              | 5373078           | 5381786         | 4             | /                  | <i>g-ADL<sub>DSF</sub>-02-3</i> | /                               | /                 | /                               | <i>g-AAT<sub>DFM</sub>-02-4</i>  | ①/(⑤)         |
| <i>Glyma02g06841</i> | 2_5498988_Block_2_5497451_5499522    | 5497451           | 5499522         | 2             | /                  | /                               | /                               | /                 | /                               | <i>g-AAT<sub>DFM</sub>-02-5</i>  | ⑩             |
| <i>Glyma02g07010</i> | Block_2_5618681_5620028              | 5618681           | 5620028         | 4             | <i>g-DSF-02-5</i>  | /                               | /                               | /                 | /                               | /                                | ⑦             |
| <i>Glyma02g07270</i> | Block_2_5772064_5783545              | 5772064           | 5783545         | 3             | /                  | /                               | /                               | <i>g-DFM-02-3</i> | /                               | /                                | ②/(④)         |
| <i>Glyma02g07640</i> | 2_6025291_Block_2_6013205_6030334    | 6013205           | 6030334         | 2             | /                  | /                               | <i>g-AAT<sub>DSF</sub>-02-4</i> | /                 | /                               | /                                | ⑧             |
| <i>Glyma02g08091</i> | 2_6338428_Block_2_6336129_6338496    | 6336129           | 6338496         | 2             | /                  | /                               | /                               | /                 | <i>g-ADL<sub>DFM</sub>-02-2</i> | /                                | ⑩             |
| <i>Glyma02g08430</i> | Block_2_6606530_6610284              | 6606530           | 6610284         | 3             | /                  | /                               | /                               | /                 | /                               | <i>g-AAT<sub>DFM</sub>-02-6</i>  | ⑥             |
| <i>Glyma02g08620</i> | Block_2_6704552_6712419              | 6704552           | 6712419         | 3             | /                  | <i>g-ADL<sub>DSF</sub>-02-4</i> | /                               | /                 | <i>g-ADL<sub>DFM</sub>-02-3</i> | /                                | ⑩             |
| <i>Glyma02g08790</i> | 2_6814590_Block_2_6808506_6815124    | 6808506           | 6815124         | 2             | <i>g-DSF-02-6</i>  | /                               | /                               | /                 | /                               | /                                | ①/(②)         |
| <i>Glyma02g13165</i> | Block_2_11380636_11383227            | 11380636          | 11383227        | 5             | /                  | <i>g-ADL<sub>DSF</sub>-02-5</i> | /                               | /                 | /                               | /                                | ⑩             |
| <i>Glyma02g13655</i> | Block_2_11962235_11969162            | 11962235          | 11969162        | 2             | /                  | <i>g-ADL<sub>DSF</sub>-02-6</i> | /                               | /                 | /                               | /                                | ⑧             |
| <i>Glyma02g15470</i> | Block_2_13966704_13982279            | 13966704          | 13982279        | 3             | /                  | /                               | /                               | /                 | /                               | <i>g-AAT<sub>DFM</sub>-02-7</i>  | ⑩             |
| <i>Glyma02g15561</i> | Block_2_14038090_14039926            | 14038090          | 14039926        | 4             | /                  | /                               | <i>g-AAT<sub>DSF</sub>-02-5</i> | /                 | /                               | /                                | ⑩             |
| <i>Glyma02g16560</i> | 2_14939413_Block_2_14938939_14940735 | 14938939          | 14940735        | 2             | /                  | <i>g-ADL<sub>DSF</sub>-02-7</i> | /                               | /                 | /                               | /                                | ⑩             |
| <i>Glyma02g19000</i> | Block_2_17800639_17804109            | 17800639          | 17804109        | 2             | /                  | /                               | /                               | /                 | /                               | <i>0g-AAT<sub>DFM</sub>-02-8</i> | ⑤/(⑦)         |
| <i>Glyma02g26620</i> | 2_27546010_Block_2_27538568_27547029 | 27538568          | 27547029        | 2             | <i>g-DSF-02-7</i>  | /                               | /                               | /                 | /                               | /                                | ①             |
| <i>Glyma02g31295</i> | Block_2_34032288_34046647            | 34032288          | 34046647        | 3             | /                  | /                               | /                               | /                 | <i>g-ADL<sub>DFM</sub>-02-4</i> | /                                | ⑤             |
| <i>Glyma02g36665</i> | Block_2_42109438_42110485            | 42109438          | 42110485        | 2             | /                  | /                               | /                               | /                 | <i>g-ADL<sub>DFM</sub>-02-5</i> | /                                | ⑩             |
| <i>Glyma02g37350</i> | Block_2_42688765_42695750            | 42688765          | 42695750        | 3             | <i>g-DSF-02-8</i>  | /                               | <i>g-AAT<sub>DSF</sub>-02-6</i> | /                 | /                               | /                                | ⑦             |
| <i>Glyma02g38790</i> | 2_44148112_Block_2_44138604_44149762 | 44138604          | 44149762        | 2             | <i>g-DSF-02-9</i>  | /                               | /                               | /                 | /                               | /                                | ⑩             |
| <i>Glyma02g39495</i> | Block_2_44802132_44811779            | 44802132          | 44811779        | 3             | /                  | <i>g-ADL<sub>DSF</sub>-02-8</i> | /                               | /                 | /                               | /                                | ④/(⑧)         |
| <i>Glyma02g40650</i> | 2_45897419_Block_2_45888235_45899367 | 45888235          | 45899367        | 2             | /                  | /                               | /                               | <i>g-DFM-02-4</i> | /                               | /                                | ①/(⑤)/(⑦)     |
| <i>Glyma02g41040</i> | Block_2_46213331_46222911            | 46213331          | 46222911        | 3             | /                  | /                               | /                               | <i>g-DFM-02-5</i> | /                               | /                                | ⑦             |
| <i>Glyma02g42290</i> | 2_47355073_Block_2_47353533_47359138 | 47353533          | 47359138        | 2             | /                  | /                               | /                               | /                 | /                               | <i>g-AAT<sub>DFM</sub>-02-9</i>  | ⑦             |
| <i>Glyma02g43025</i> | 2_47916058_Block_2_47910442_47919144 | 47910442          | 47919144        | 2             | /                  | /                               | /                               | /                 | <i>g-ADL<sub>DFM</sub>-02-6</i> | /                                | ⑧/(⑨)         |
| <i>Glyma02g45630</i> | 2_49820623_Block_2_49816299_49823607 | 49816299          | 49823607        | 2             | <i>g-DSF-02-10</i> | /                               | /                               | /                 | /                               | /                                | ⑥/(⑧)         |
| <i>Glyma02g45790</i> | Block_2_49937008_49942753            | 49937008          | 49942753        | 3             | /                  | /                               | <i>g-AAT<sub>DSF</sub>-02-7</i> | /                 | /                               | /                                | ⑧             |
| <i>Glyma02g45960</i> | Block_2_50058602_50081372            | 50058602          | 50081372        | 2             | /                  | <i>g-ADL<sub>DSF</sub>-02-9</i> | /                               | /                 | /                               | /                                | ⑤             |
| <i>Glyma02g46400</i> | 2_50368934_Block_2_50368276_50370502 | 50368276          | 50370502        | 2             | /                  | /                               | /                               | /                 | /                               | <i>g-AAT<sub>DFM</sub>-02-10</i> | ⑩             |
| <i>Glyma02g46800</i> | 2_50645254_Block_2_50644219_50650679 | 50644219          | 50650679        | 2             | /                  | /                               | <i>g-AAT<sub>DSF</sub>-02-8</i> | /                 | /                               | /                                | ⑥             |
| <i>Glyma02g46810</i> | 2_50660676_Block_2_50659738_50666155 | 50659738          | 50666155        | 2             | /                  | /                               | /                               | /                 | <i>g-ADL<sub>DFM</sub>-02-7</i> | /                                | ⑥             |
| <i>Glyma02g48010</i> | 2_51400285_Block_2_51394513_51401344 | 51394513          | 51401344        | 2             | <i>g-DSF-02-11</i> | /                               | <i>g-AAT<sub>DSF</sub>-02-9</i> | /                 | /                               | /                                | ⑩             |

|               |                                      |          |          |   |            |                            |                            |            |                             |                            |       |
|---------------|--------------------------------------|----------|----------|---|------------|----------------------------|----------------------------|------------|-----------------------------|----------------------------|-------|
| Glyma03g02390 | 3_2153744_Block_3_2139071_2153795    | 2139071  | 2153795  | 2 | /          | g-ADL <sub>DSF</sub> -03-1 | /                          | /          | /                           | /                          | ⑥     |
| Glyma03g02500 | Block_3_2276240_2279952              | 2276240  | 2279952  | 3 | /          | /                          | /                          | /          | g-ADL <sub>DFM</sub> -03-1  | /                          | ⑤     |
| Glyma03g02940 | Block_3_2757705_2762734              | 2757705  | 2762734  | 6 | g-DSF-03-1 | /                          | /                          | g-DFM-03-1 | g-ADL <sub>DFM</sub> -03-2  | /                          | ⑩     |
| Glyma03g03120 | Block_3_2912959_2933829              | 2912959  | 2933829  | 5 | g-DSF-03-2 | /                          | /                          | /          | /                           | /                          | ①     |
| Glyma03g04590 | Block_3_4757597_4764753              | 4757597  | 4764753  | 5 | /          | /                          | /                          | /          | g-ADL <sub>DFM</sub> -03-3  | /                          | ⑦     |
| Glyma03g04720 | Block_3_4917301_4924329              | 4917301  | 4924329  | 6 | g-DSF-03-3 | /                          | /                          | /          | /                           | /                          | ⑩     |
| Glyma03g05120 | 3_5408085_Block_3_5405047_5409407    | 5405047  | 5409407  | 2 | /          | /                          | /                          | /          | /                           | g-AAT <sub>DFM</sub> -03-1 | ⑩     |
| Glyma03g06440 | Block_3_6712344_6715034              | 6712344  | 6715034  | 5 | /          | /                          | g-AAT <sub>DSF</sub> -03-1 | /          | /                           | /                          | ⑤     |
| Glyma03g06483 | Block_3_6755858_6757490              | 6755858  | 6757490  | 3 | /          | /                          | /                          | g-DFM-03-2 | g-ADL <sub>DFM</sub> -03-4  | /                          | ④/⑦/⑧ |
| Glyma03g15870 | 3_20197046_Block_3_20197005_20200237 | 20197005 | 20200237 | 2 | /          | g-ADL <sub>DSF</sub> -03-2 | /                          | /          | /                           | /                          | ⑤     |
| Glyma03g18725 | Block_3_23895580_23919054            | 23895580 | 23919054 | 5 | /          | /                          | /                          | /          | /                           | g-AAT <sub>DFM</sub> -03-2 | ⑩     |
| Glyma03g20420 | 3_25948733_Block_3_25943786_25950785 | 25943786 | 25950785 | 2 | /          | /                          | /                          | /          | /                           | g-AAT <sub>DFM</sub> -03-3 | ⑥     |
| Glyma03g24890 | 3_31811597_Block_3_31806821_31812814 | 31806821 | 31812814 | 2 | /          | /                          | /                          | g-DFM-03-3 | /                           | /                          | ⑩     |
| Glyma03g25145 | Block_3_32117666_32139732            | 32117666 | 32139732 | 4 | /          | /                          | /                          | g-DFM-03-4 | /                           | /                          | ①/⑥   |
| Glyma03g27150 | Block_3_34672940_34684987            | 34672940 | 34684987 | 3 | /          | g-ADL <sub>DSF</sub> -03-3 | /                          | /          | /                           | /                          | ⑩     |
| Glyma03g27290 | 3_34979145_Block_3_34977900_34980034 | 34977900 | 34980034 | 2 | /          | /                          | /                          | /          | g-ADL <sub>DFM</sub> -03-5  | /                          | ⑦     |
| Glyma03g27970 | Block_3_35773797_35777130            | 35773797 | 35777130 | 4 | g-DSF-03-4 | g-ADL <sub>DSF</sub> -03-4 | /                          | /          | /                           | /                          | ③/⑦   |
| Glyma03g29010 | Block_3_36959429_36972106            | 36959429 | 36972106 | 4 | /          | /                          | /                          | /          | /                           | g-AAT <sub>DFM</sub> -03-4 | ⑥     |
| Glyma03g29060 | Block_3_37006191_37009001            | 37006191 | 37009001 | 3 | /          | /                          | /                          | /          | /                           | g-AAT <sub>DFM</sub> -03-5 | ⑩     |
| Glyma03g29070 | Block_3_37017711_37021248            | 37017711 | 37021248 | 3 | /          | g-ADL <sub>DSF</sub> -03-5 | /                          | /          | /                           | /                          | ⑤     |
| Glyma03g29230 | Block_3_37184174_37222229            | 37184174 | 37222229 | 4 | /          | /                          | g-AAT <sub>DSF</sub> -03-2 | /          | g-ADL <sub>DFM</sub> -03-6  | /                          | ⑧     |
| Glyma03g33000 | Block_3_40689640_40693587            | 40689640 | 40693587 | 4 | /          | /                          | g-AAT <sub>DSF</sub> -03-3 | /          | /                           | /                          | ⑩     |
| Glyma03g33470 | 3_41029045_Block_3_41027184_41030475 | 41027184 | 41030475 | 2 | /          | g-ADL <sub>DSF</sub> -03-6 | /                          | /          | /                           | /                          | ①/⑤   |
| Glyma03g34900 | 3_42205000_Block_3_42204661_42207243 | 42204661 | 42207243 | 2 | /          | /                          | /                          | /          | /                           | g-AAT <sub>DFM</sub> -03-6 | ③/⑤   |
| Glyma03g38171 | 3_44572005_Block_3_44569717_44573490 | 44569717 | 44573490 | 2 | /          | /                          | /                          | /          | g-ADL <sub>DFM</sub> -03-7  | /                          | ⑩     |
| Glyma03g39050 | 3_45279841_Block_3_45279743_45281178 | 45279743 | 45281178 | 2 | /          | g-ADL <sub>DSF</sub> -03-7 | /                          | /          | /                           | /                          | ⑩     |
| Glyma03g39850 | Block_3_45790397_45794969            | 45790397 | 45794969 | 3 | /          | /                          | /                          | /          | g-ADL <sub>DFM</sub> -03-8  | /                          | ⑥     |
| Glyma03g39870 | Block_3_45803748_45806283            | 45803748 | 45806283 | 3 | /          | /                          | /                          | g-DFM-03-5 | /                           | /                          | ⑩     |
| Glyma03g40780 | Block_3_46431667_46441697            | 46431667 | 46441697 | 3 | g-DSF-03-5 | /                          | /                          | /          | /                           | /                          | ③/⑧   |
| Glyma03g41200 | Block_3_46724556_46730266            | 46724556 | 46730266 | 3 | /          | /                          | /                          | g-DFM-03-6 | /                           | /                          | ⑧     |
| Glyma03g41280 | Block_3_46774543_46779426            | 46774543 | 46779426 | 3 | /          | /                          | /                          | /          | g-ADL <sub>DFM</sub> -03-9  | /                          | ⑩     |
| Glyma03g41290 | Block_3_46782386_46810161            | 46782386 | 46810161 | 2 | g-DSF-03-6 | /                          | /                          | /          | /                           | /                          | ⑧     |
| Glyma03g41320 | 3_46833583_Block_3_46831055_46834070 | 46831055 | 46834070 | 2 | /          | g-ADL <sub>DSF</sub> -03-8 | /                          | /          | /                           | /                          | ⑧     |
| Glyma03g41360 | 3_46881880_Block_3_46880973_46883067 | 46880973 | 46883067 | 2 | /          | /                          | /                          | /          | g-ADL <sub>DFM</sub> -03-10 | /                          | ⑦/⑧   |
| Glyma03g41520 | 3_46951037_Block_3_46950548_46951293 | 46950548 | 46951293 | 2 | /          | /                          | g-AAT <sub>DSF</sub> -03-4 | /          | /                           | /                          | ⑩     |
| Glyma03g42060 | Block_3_47371310_47372914            | 47371310 | 47372914 | 3 | /          | /                          | g-AAT <sub>DSF</sub> -03-5 | /          | /                           | /                          | ⑩     |
| Glyma04g01990 | 4_1360177_Block_4_1360026_1372881    | 1360026  | 1372881  | 2 | /          | /                          | /                          | /          | g-ADL <sub>DFM</sub> -04-1  | /                          | ⑤     |
| Glyma04g02330 | Block_4_1605016_1611651              | 1605016  | 1611651  | 4 | /          | /                          | /                          | g-DFM-04-1 | /                           | /                          | ①     |
| Glyma04g02740 | Block_4_1934014_1941547              | 1934014  | 1941547  | 3 | /          | /                          | g-AAT <sub>DSF</sub> -04-1 | /          | /                           | /                          | ⑦     |
| Glyma04g02850 | Block_4_2059088_2063081              | 2059088  | 2063081  | 4 | /          | /                          | g-AAT <sub>DSF</sub> -04-2 | /          | /                           | /                          | ⑤/⑧   |
| Glyma04g02980 | Block_4_2155604_2159914              | 2155604  | 2159914  | 3 | /          | /                          | /                          | /          | /                           | g-AAT <sub>DFM</sub> -04-1 | ①/⑤   |
| Glyma04g04810 | Block_4_3567302_3577686              | 3567302  | 3577686  | 3 | /          | /                          | /                          | g-DFM-04-2 | /                           | /                          | ⑥     |
| Glyma04g05471 | Block_4_4135841_4138280              | 4135841  | 4138280  | 5 | /          | /                          | /                          | /          | g-ADL <sub>DFM</sub> -04-2  | /                          | ⑧     |
| Glyma04g05600 | 4_4269464_Block_4_4264746_4269923    | 4264746  | 4269923  | 2 | /          | /                          | g-AAT <sub>DSF</sub> -04-3 | /          | /                           | /                          | ①/⑧   |
| Glyma04g06240 | Block_4_4774049_4775966              | 4774049  | 4775966  | 4 | /          | /                          | /                          | /          | g-AAT <sub>DFM</sub> -04-2  | /                          | ⑤/⑦   |
| Glyma04g06600 | Block_4_5049829_5055377              | 5049829  | 5055377  | 4 | /          | g-ADL <sub>DSF</sub> -04-1 | /                          | /          | /                           | /                          | ⑩     |
| Glyma04g06940 | 4_5366405_Block_4_5365795_5367560    | 5365795  | 5367560  | 2 | /          | /                          | /                          | g-DFM-04-3 | /                           | /                          | ⑩     |
| Glyma04g07160 | 4_5568883_Block_4_5568471_5571119    | 5568471  | 5571119  | 2 | /          | g-ADL <sub>DSF</sub> -04-2 | /                          | /          | /                           | /                          | ⑤/⑧   |
| Glyma04g07430 | 4_5773213_Block_4_5770334_5773812    | 5770334  | 5773812  | 2 | g-DSF-04-1 | /                          | /                          | /          | /                           | /                          | ⑧     |
| Glyma04g09910 | 4_8198712_Block_4_8197404_8199603    | 8197404  | 8199603  | 2 | g-DSF-04-2 | /                          | /                          | /          | /                           | /                          | ⑦     |
| Glyma04g09950 | 4_8241411_Block_4_8238777_8246273    | 8238777  | 8246273  | 2 | /          | /                          | /                          | /          | g-ADL <sub>DFM</sub> -04-3  | /                          | ⑨     |
| Glyma04g10050 | Block_4_8302112_8307589              | 8302112  | 8307589  | 4 | /          | /                          | /                          | /          | g-ADL <sub>DFM</sub> -04-4  | /                          | ⑥/⑦   |
| Glyma04g10451 | Block_4_8670881_8701308              | 8670881  | 8701308  | 3 | /          | /                          | /                          | /          | g-DFM-04-4                  | /                          | ⑥     |
| Glyma04g12320 | 4_11341353_Block_4_11340795_11343215 | 11340795 | 11343215 | 2 | /          | /                          | /                          | /          | g-ADL <sub>DFM</sub> -04-5  | /                          | ⑤     |
| Glyma04g13142 | Block_4_12726785_12728920            | 12726785 | 12728920 | 3 | /          | /                          | /                          | /          | g-DFM-04-5                  | /                          | ⑩     |
| Glyma04g16100 | Block_4_17071886_17084681            | 17071886 | 17084681 | 6 | /          | /                          | /                          | /          | /                           | g-AAT <sub>DFM</sub> -04-3 | ①     |
| Glyma04g16180 | Block_4_17191541_17204756            | 17191541 | 17204756 | 4 | /          | g-ADL <sub>DSF</sub> -04-3 | /                          | /          | /                           | /                          | ②/⑤   |
| Glyma04g20400 | Block_4_22435029_22443669            | 22435029 | 22443669 | 4 | /          | /                          | /                          | /          | /                           | g-AAT <sub>DFM</sub> -04-4 | ⑩     |
| Glyma04g33110 | Block_4_38589698_38595505            | 38589698 | 38595505 | 3 | /          | /                          | /                          | /          | g-ADL <sub>DFM</sub> -04-6  | /                          | ②/⑤   |
| Glyma04g35730 | Block_4_42209590_42213796            | 42209590 | 42213796 | 4 | /          | /                          | g-AAT <sub>DSF</sub> -04-4 | /          | /                           | /                          | ⑥     |
| Glyma04g36240 | Block_4_42776832_42784326            | 42776832 | 42784326 | 3 | g-DSF-04-3 | /                          | g-AAT <sub>DSF</sub> -04-5 | /          | /                           | /                          | ⑩     |
| Glyma04g36260 | Block_4_42819644_42824277            | 42819644 | 42824277 | 3 | /          | /                          | /                          | /          | g-ADL <sub>DFM</sub> -04-7  | /                          | ⑧     |
| Glyma04g36630 | Block_4_43141886_43152420            | 43141886 | 43152420 | 2 | /          | /                          | g-AAT <sub>DSF</sub> -04-6 | /          | /                           | /                          | ①/④/⑦ |
| Glyma04g36790 | 4_43304222_Block_4_43304149_43309436 | 43304149 | 43309436 | 2 | /          | /                          | /                          | /          | /                           | g-AAT <sub>DFM</sub> -04-5 | ⑦     |

|               |                                      |          |          |   |            |                            |                              |            |                            |                            |       |
|---------------|--------------------------------------|----------|----------|---|------------|----------------------------|------------------------------|------------|----------------------------|----------------------------|-------|
| Glyma04g37000 | 4_43472097_Block_4_43470306_43475797 | 43470306 | 43475797 | 2 | /          | /                          | /                            | g-DFM-04-6 | /                          | /                          | ⑦     |
| Glyma04g38955 | Block_4_45238405_45241750            | 45238405 | 45241750 | 3 | /          | /                          | /                            | /          | /                          | g-AAT <sub>DFM</sub> -04-6 | ⑤/⑥   |
| Glyma04g39610 | 4_45798473_Block_4_45797339_45801559 | 45797339 | 45801559 | 2 | g-DSF-04-4 | /                          | /                            | /          | /                          | /                          | ⑥     |
| Glyma04g40310 | 4_46417298_Block_4_46406328_46417822 | 46406328 | 46417822 | 2 | /          | /                          | /                            | /          | /                          | g-AAT <sub>DFM</sub> -04-7 | ①/⑤   |
| Glyma04g41390 | 4_47233848_Block_4_47231017_47236260 | 47231017 | 47236260 | 2 | /          | g-ADL <sub>DSF</sub> -04-4 | /                            | /          | /                          | /                          | ④/⑤/⑥ |
| Glyma04g42010 | Block_4_47794226_47796648            | 47794226 | 47796648 | 3 | /          | /                          | /                            | /          | /                          | g-AAT <sub>DFM</sub> -04-8 | ⑨     |
| Glyma04g42900 | Block_4_48528145_48532416            | 48528145 | 48532416 | 3 | /          | /                          | /                            | /          | g-ADL <sub>DFM</sub> -04-8 | /                          | ⑥     |
| Glyma04g42981 | Block_4_48598361_48599194            | 48598361 | 48599194 | 2 | /          | /                          | g-AAT <sub>DSF</sub> -04-7   | /          | /                          | /                          | ⑩     |
| Glyma04g43550 | 4_49093154_Block_4_49092402_49095573 | 49092402 | 49095573 | 2 | /          | g-ADL <sub>DSF</sub> -04-5 | /                            | /          | /                          | /                          | ⑥     |
| Glyma05g01943 | Block_5_1401783_1404122              | 1401783  | 1404122  | 3 | /          | /                          | /                            | /          | /                          | g-AAT <sub>DFM</sub> -05-1 | ⑩     |
| Glyma05g02130 | 5_1554612_Block_5_1549339_1555419    | 1549339  | 1555419  | 2 | /          | /                          | /                            | g-DFM-05-1 | /                          | /                          | ⑧/⑨   |
| Glyma05g02140 | Block_5_1562541_1564269              | 1562541  | 1564269  | 3 | g-DSF-05-1 | /                          | /                            | /          | /                          | /                          | ⑩     |
| Glyma05g02470 | 5_1819575_Block_5_1817624_1822457    | 1817624  | 1822457  | 2 | /          | /                          | g-AAT <sub>DSF</sub> -05-1   | /          | /                          | /                          | ⑥/⑧   |
| Glyma05g02790 | 5_2133489_Block_5_2130631_2134436    | 2130631  | 2134436  | 2 | g-DSF-05-2 | /                          | /                            | /          | /                          | /                          | ⑥     |
| Glyma05g04330 | Block_5_3498691_3503345              | 3498691  | 3503345  | 3 | /          | /                          | /                            | g-DFM-05-2 | /                          | /                          | ⑩     |
| Glyma05g04561 | 5_3704626_Block_5_3704617_3711041    | 3704617  | 3711041  | 2 | /          | /                          | /                            | /          | g-ADL <sub>DFM</sub> -05-1 | g-AAT <sub>DFM</sub> -05-2 | ⑩     |
| Glyma05g08670 | Block_5_8547050_8549538              | 8547050  | 8549538  | 3 | /          | /                          | /                            | g-DFM-05-3 | /                          | /                          | ⑩     |
| Glyma05g09170 | Block_5_8950179_8957086              | 8950179  | 8957086  | 2 | /          | /                          | /                            | g-DFM-05-4 | /                          | /                          | ⑩     |
| Glyma05g22680 | 5_28029661_Block_5_28028771_28030131 | 28028771 | 28030131 | 2 | /          | /                          | /                            | /          | g-ADL <sub>DFM</sub> -05-2 | /                          | ⑩     |
| Glyma05g23000 | Block_5_28432571_28443362            | 28432571 | 28443362 | 3 | /          | /                          | /                            | g-DFM-05-5 | /                          | /                          | ⑩     |
| Glyma05g23731 | Block_5_29497446_29511105            | 29497446 | 29511105 | 3 | /          | g-ADL <sub>DSF</sub> -05-1 | /                            | /          | /                          | /                          | ⑧     |
| Glyma05g24580 | 5_30745874_Block_5_30741313_30746355 | 30741313 | 30746355 | 2 | /          | /                          | /                            | /          | g-ADL <sub>DFM</sub> -05-3 | /                          | ⑩     |
| Glyma05g25485 | 5_31581611_Block_5_31577344_31582079 | 31577344 | 31582079 | 2 | /          | /                          | /                            | /          | /                          | g-AAT <sub>DFM</sub> -05-3 | ⑩     |
| Glyma05g26050 | 5_32061707_Block_5_32060512_32062911 | 32060512 | 32062911 | 2 | /          | g-ADL <sub>DSF</sub> -05-2 | /                            | /          | /                          | /                          | ⑩     |
| Glyma05g26620 | 5_32545029_Block_5_32544734_32549138 | 32544734 | 32549138 | 2 | /          | /                          | /                            | g-DFM-05-6 | /                          | g-AAT <sub>DFM</sub> -05-4 | ④/⑧   |
| Glyma05g27870 | Block_5_33722834_33724150            | 33722834 | 33724150 | 2 | /          | g-ADL <sub>DSF</sub> -05-3 | /                            | /          | /                          | /                          | ④/⑧   |
| Glyma05g29190 | Block_5_34857613_34860916            | 34857613 | 34860916 | 5 | /          | g-AAT <sub>DSF</sub> -05-4 | /                            | /          | /                          | /                          | ⑥/⑧   |
| Glyma05g29200 | 5_34871857_Block_5_34870284_34874742 | 34870284 | 34874742 | 2 | /          | /                          | /                            | g-DFM-05-7 | /                          | /                          | ③/⑦/⑧ |
| Glyma05g29880 | Block_5_35346130_35350415            | 35346130 | 35350415 | 2 | /          | /                          | /                            | /          | g-ADL <sub>DFM</sub> -05-4 | /                          | ⑩     |
| Glyma05g31250 | Block_5_36389171_36392674            | 36389171 | 36392674 | 3 | g-DSF-05-3 | /                          | g-AAT <sub>DSF</sub> -05-2   | /          | /                          | /                          | ③     |
| Glyma05g32030 | 5_37027716_Block_5_37026301_37031440 | 37026301 | 37031440 | 2 | g-DSF-05-4 | /                          | /                            | /          | /                          | /                          | ⑧     |
| Glyma05g35310 | 5_39378064_Block_5_39377703_39385245 | 39377703 | 39385245 | 2 | /          | /                          | /                            | /          | g-ADL <sub>DFM</sub> -05-5 | /                          | ⑥     |
| Glyma05g37380 | 5_40984736_Block_5_40984367_40994598 | 40984367 | 40994598 | 2 | /          | g-ADL <sub>DSF</sub> -05-5 | /                            | /          | /                          | /                          | ⑧     |
| Glyma05g38075 | Block_5_41501804_41509361            | 41501804 | 41509361 | 3 | /          | /                          | /                            | g-DFM-05-8 | /                          | /                          | ⑩     |
| Glyma0006s50  | Block_6_1758_15096                   | 1758     | 15096    | 2 | /          | /                          | /                            | g-DFM-06-1 | /                          | /                          | ④/⑦   |
| Glyma06g03470 | 6_2424859_Block_6_2423386_2428029    | 2423386  | 2428029  | 2 | g-DSF-06-1 | /                          | /                            | /          | g-ADL <sub>DFM</sub> -06-1 | /                          | ⑤     |
| Glyma06g04140 | 6_2882783_Block_6_2881673_2883094    | 2881673  | 2883094  | 2 | /          | /                          | g-AAT <sub>DSF</sub> -06-1   | /          | /                          | /                          | ⑩     |
| Glyma06g05870 | Block_6_4199931_4201104              | 4199931  | 4201104  | 3 | /          | /                          | /                            | g-DFM-06-2 | /                          | /                          | ⑩     |
| Glyma06g05890 | Block_6_4207295_4216123              | 4207295  | 4216123  | 2 | /          | /                          | /                            | /          | g-ADL <sub>DFM</sub> -06-2 | /                          | ⑥     |
| Glyma06g10320 | Block_6_7790944_7826996              | 7790944  | 7826996  | 5 | /          | g-ADL <sub>DSF</sub> -06-1 | /                            | /          | /                          | /                          | ⑦     |
| Glyma06g11120 | 6_8479122_Block_6_8467947_8483520    | 8467947  | 8483520  | 2 | /          | /                          | /                            | /          | /                          | g-AAT <sub>DFM</sub> -06-1 | ⑦/⑧   |
| Glyma06g11370 | Block_6_8719520_8730703              | 8719520  | 8730703  | 4 | /          | /                          | g-AAT <sub>DSF</sub> -06-2   | /          | /                          | /                          | ⑩     |
| Glyma06g13320 | Block_6_10466896_10472898            | 10466896 | 10472898 | 2 | g-DSF-06-2 | /                          | /                            | /          | /                          | /                          | ⑧     |
| Glyma06g13985 | Block_6_11053511_11054273            | 11053511 | 11054273 | 3 | /          | /                          | /                            | /          | g-ADL <sub>DFM</sub> -06-3 | /                          | ⑩     |
| Glyma06g15020 | 6_11809614_Block_6_11804605_11814857 | 11804605 | 11814857 | 2 | g-DSF-06-3 | /                          | /                            | /          | /                          | /                          | ⑥     |
| Glyma06g15390 | 6_12135265_Block_6_12134893_12135784 | 12134893 | 12135784 | 2 | /          | /                          | /                            | /          | /                          | g-AAT <sub>DFM</sub> -06-2 | ⑩     |
| Glyma06g15890 | 6_12501439_Block_6_12500229_12501933 | 12500229 | 12501933 | 2 | /          | /                          | /                            | /          | g-ADL <sub>DFM</sub> -06-4 | /                          | ②/⑧   |
| Glyma06g16330 | Block_6_12817416_12825189            | 12817416 | 12825189 | 4 | g-DSF-06-4 | /                          | /                            | /          | /                          | /                          | ⑩     |
| Glyma06g16930 | Block_6_13307622_13311321            | 13307622 | 13311321 | 3 | /          | /                          | g-AAT <sub>DSF</sub> -06-3   | /          | /                          | /                          | ⑧     |
| Glyma06g17390 | Block_6_13703318_13713477            | 13703318 | 13713477 | 3 | /          | /                          | /                            | /          | /                          | g-AAT <sub>DFM</sub> -06-3 | ⑩     |
| Glyma06g17451 | 6_13804692_Block_6_13802452_13808691 | 13802452 | 13808691 | 2 | /          | /                          | /                            | /          | /                          | g-AAT <sub>DFM</sub> -06-4 | ⑩     |
| Glyma06g18216 | Block_6_14541262_14603971            | 14541262 | 14603971 | 4 | /          | /                          | /                            | g-DFM-06-3 | /                          | /                          | ①/④   |
| Glyma06g18580 | 6_14868170_Block_6_14867697_14876182 | 14867697 | 14876182 | 2 | /          | g-ADL <sub>DSF</sub> -06-2 | /                            | /          | /                          | /                          | ①     |
| Glyma06g19380 | 6_15600413_Block_6_15599391_15600917 | 15599391 | 15600917 | 2 | /          | /                          | /                            | /          | /                          | g-AAT <sub>DFM</sub> -06-5 | ⑩     |
| Glyma06g19480 | 6_15738284_Block_6_15737043_15739732 | 15737043 | 15739732 | 2 | /          | /                          | /                            | /          | g-ADL <sub>DFM</sub> -06-5 | g-AAT <sub>DFM</sub> -06-6 | ②/⑦/⑨ |
| Glyma06g19651 | 6_15963037_Block_6_15962494_15964022 | 15962494 | 15964022 | 2 | /          | /                          | g-AAT <sub>DSF</sub> -06-4   | /          | /                          | /                          | ⑧     |
| Glyma06g20950 | 6_17335692_Block_6_17335571_17338829 | 17335571 | 17338829 | 2 | /          | /                          | g-AAT <sub>DSF</sub> -06-5   | /          | /                          | /                          | ⑤     |
| Glyma06g23580 | Block_6_20904283_20914087            | 20904283 | 20914087 | 4 | g-DSF-06-5 | g-ADL <sub>DSF</sub> -06-3 | g-AAT <sub>DSF</sub> -06-6   | /          | g-ADL <sub>DFM</sub> -06-6 | /                          | ⑩     |
| Glyma06g32870 | Block_6_33837618_33843206            | 33837618 | 33843206 | 4 | /          | g-ADL <sub>DSF</sub> -06-4 | g-AAT <sub>DSF</sub> -06-7   | /          | /                          | /                          | ⑩     |
| Glyma06g36380 | 6_38548244_Block_6_38545298_38554455 | 38545298 | 38554455 | 2 | g-DSF-06-6 | /                          | g-AAT <sub>DSF</sub> -06-8   | /          | /                          | /                          | ④     |
| Glyma06g40370 | Block_6_43518780_43522569            | 43518780 | 43522569 | 4 | g-DSF-06-7 | /                          | /                            | /          | /                          | /                          | ⑧     |
| Glyma06g40560 | Block_6_43723614_43727398            | 43723614 | 43727398 | 3 | /          | /                          | /                            | /          | /                          | g-AAT <sub>DFM</sub> -06-7 | ⑧     |
| Glyma06g40670 | Block_6_43829510_43834104            | 43829510 | 43834104 | 4 | /          | /                          | g-AAT <sub>DSF</sub> -06-9   | g-DFM-06-4 | g-ADL <sub>DFM</sub> -06-7 | /                          | ⑧     |
| Glyma06g42730 | 6_46065201_Block_6_46063689_46069098 | 46063689 | 46069098 | 2 | /          | /                          | g-AAT <sub>DSF</sub> -06-10/ | /          | /                          | /                          | ⑥     |



|               |                                      |          |          |   |             |                            |                               |            |                            |                            |                            |         |
|---------------|--------------------------------------|----------|----------|---|-------------|----------------------------|-------------------------------|------------|----------------------------|----------------------------|----------------------------|---------|
| Glyma06g43951 | 6_46933905_Block_6_46932145_46936357 | 46932145 | 46936357 | 2 | /           |                            | g-ADL <sub>DSF</sub> -06-5    | /          | /                          | /                          | /                          | ①/⑧     |
| Glyma06g44630 | 6_47495235_Block_6_47493702_47498334 | 47493702 | 47498334 | 2 | /           |                            | g-ADL <sub>DSF</sub> -06-6    | /          | /                          | /                          | /                          | ⑤       |
| Glyma06g45220 | 6_48032833_Block_6_48032729_48035503 | 48032729 | 48035503 | 2 | /           | /                          | g-AAT <sub>DSF</sub> -06-11/  | /          | /                          | /                          | /                          | ⑩       |
| Glyma06g45450 | Block_6_48159801_48166369            | 48159801 | 48166369 | 4 | /           | /                          | /                             | g-DFM-06-5 | /                          | /                          | /                          | ⑦       |
| Glyma06g46150 | Block_6_48819539_48826307            | 48819539 | 48826307 | 3 | /           | /                          | /                             | g-DFM-06-6 | /                          | /                          | /                          | ⑥       |
| Glyma06g46781 | Block_6_49348476_49354343            | 49348476 | 49354343 | 3 | g-DSF-06-8  | /                          | /                             | /          | /                          | /                          | /                          | ⑨       |
| Glyma06g47590 | Block_6_49984461_49991248            | 49984461 | 49991248 | 4 | g-DSF-06-9  |                            | 0g-AAT <sub>DSF</sub> -06-12/ | /          | /                          | /                          | /                          | ⑩       |
| Glyma06g48150 | Block_6_50439510_50444604            | 50439510 | 50444604 | 3 | /           | /                          | /                             | g-DFM-06-7 | /                          | /                          | /                          | ⑤       |
| Glyma06g48393 | Block_6_50647868_50650673            | 50647868 | 50650673 | 3 | /           | /                          | /                             | /          | /                          | /                          | g-AAT <sub>DFM</sub> -06-8 | ⑩       |
| Glyma07g00520 | Block_7_243867_247741                | 243867   | 247741   | 4 | /           | /                          | g-AAT <sub>DSF</sub> -07-1    | /          | /                          | /                          | /                          | ③/⑤/⑦/⑧ |
| Glyma07g03005 | 7_2054346_Block_7_2052773_2062003    | 2052773  | 2062003  | 2 | /           | /                          | /                             | g-DFM-07-1 | /                          | /                          | /                          | ⑩       |
| Glyma07g04800 | 7_3540547_Block_7_3540227_3541661    | 3540227  | 3541661  | 2 | /           | /                          | /                             | /          | /                          | /                          | g-AAT <sub>DFM</sub> -07-1 | ⑤/⑧     |
| Glyma07g05290 | 7_3946123_Block_7_3942165_3947296    | 3942165  | 3947296  | 2 | /           |                            | g-ADL <sub>DSF</sub> -07-1    | /          | /                          | g-ADL <sub>DFM</sub> -07-1 | /                          | ⑩       |
| Glyma07g06420 | Block_7_5157818_5165072              | 5157818  | 5165072  | 4 | /           | /                          | /                             | /          | /                          | /                          | g-AAT <sub>DFM</sub> -07-2 | ②       |
| Glyma07g07600 | 7_6293114_Block_7_6290183_6297333    | 6290183  | 6297333  | 2 | /           | /                          | /                             | g-DFM-07-2 | /                          | /                          | /                          | ⑧       |
| Glyma07g08214 | 7_6826804_Block_7_6824048_6827468    | 6824048  | 6827468  | 2 | g-DSF-07-1  | /                          | /                             | /          | /                          | /                          | /                          | ⑧       |
| Glyma07g09170 | Block_7_7646374_7655460              | 7646374  | 7655460  | 8 | g-DSF-07-2  |                            | g-AAT <sub>DSF</sub> -07-2    | /          | /                          | /                          | /                          | ⑩       |
| Glyma07g09420 | Block_7_7852546_7856950              | 7852546  | 7856950  | 5 | /           | /                          | /                             | g-DFM-07-3 | g-ADL <sub>DFM</sub> -07-2 | /                          | /                          | ⑧       |
| Glyma07g09860 | 7_8318354_Block_7_8314303_8320645    | 8314303  | 8320645  | 2 | g-DSF-07-3  | /                          | /                             | g-DFM-07-4 | /                          | /                          | /                          | ⑧       |
| Glyma07g10060 | Block_7_8426231_8428377              | 8426231  | 8428377  | 5 | /           | /                          | g-AAT <sub>DSF</sub> -07-3    | /          | /                          | /                          | /                          | ⑩       |
| Glyma07g10541 | Block_7_8802805_8814519              | 8802805  | 8814519  | 3 | /           | /                          | /                             | /          | g-ADL <sub>DFM</sub> -07-3 | g-AAT <sub>DFM</sub> -07-3 | /                          | ⑧       |
| Glyma07g10621 | Block_7_8869326_8879181              | 8869326  | 8879181  | 6 | /           | /                          | /                             | /          | g-ADL <sub>DFM</sub> -07-4 | /                          | /                          | ⑧       |
| Glyma07g11091 | Block_7_9305397_9308161              | 9305397  | 9308161  | 3 | /           | /                          | /                             | /          | g-ADL <sub>DFM</sub> -07-5 | /                          | /                          | ⑩       |
| Glyma07g11670 | Block_7_9867874_9880578              | 9867874  | 9880578  | 3 | g-DSF-07-4  | /                          | /                             | /          | /                          | /                          | /                          | ⑧       |
| Glyma07g13710 | 7_12707963_Block_7_12705981_12708326 | 12705981 | 12708326 | 2 | g-DSF-07-5  | /                          | /                             | /          | /                          | /                          | /                          | ⑩       |
| Glyma07g14242 | 7_13599508_Block_7_13594198_13602239 | 13594198 | 13602239 | 2 | g-DSF-07-6  | /                          | /                             | /          | /                          | /                          | /                          | ⑩       |
| Glyma07g14870 | Block_7_14709171_14713495            | 14709171 | 14713495 | 3 | /           | /                          | g-AAT <sub>DSF</sub> -07-4    | /          | /                          | /                          | /                          | ⑤       |
| Glyma07g15930 | Block_7_15649032_15653633            | 15649032 | 15653633 | 4 | g-DSF-07-7  | /                          | /                             | /          | /                          | /                          | /                          | ⑥       |
| Glyma07g17620 | 7_17373271_Block_7_17372764_17375445 | 17372764 | 17375445 | 2 | /           | /                          | /                             | /          | /                          | /                          | g-AAT <sub>DFM</sub> -07-4 | ⑩       |
| Glyma07g18060 | Block_7_17821300_17825005            | 17821300 | 17825005 | 2 | /           | /                          | /                             | g-DFM-07-5 | /                          | /                          | /                          | ⑤/⑧     |
| Glyma07g20421 | 7_20623711_Block_7_20622640_20624725 | 20622640 | 20624725 | 2 | g-DSF-07-8  | /                          | /                             | /          | /                          | /                          | /                          | ⑩       |
| Glyma07g29650 | Block_7_34640179_34652411            | 34640179 | 34652411 | 2 | g-DSF-07-9  | /                          | /                             | /          | g-ADL <sub>DFM</sub> -07-6 | g-AAT <sub>DFM</sub> -07-5 | /                          | ⑨       |
| Glyma07g30140 | 7_35187021_Block_7_35186721_35192803 | 35186721 | 35192803 | 2 | /           | /                          | g-AAT <sub>DSF</sub> -07-5    | /          | /                          | /                          | /                          | ⑤       |
| Glyma07g33190 | 7_38111183_Block_7_38110940_38111341 | 38110940 | 38111341 | 2 | g-DSF-07-10 | /                          | /                             | /          | /                          | /                          | /                          | ⑩       |
| Glyma07g33880 | 7_38814683_Block_7_38814437_38816833 | 38814437 | 38816833 | 2 | /           | /                          | /                             | g-DFM-07-6 | /                          | /                          | /                          | ⑦       |
| Glyma07g34820 | 7_39871777_Block_7_39859215_39875837 | 39859215 | 39875837 | 2 | /           | /                          | /                             | /          | /                          | /                          | g-AAT <sub>DFM</sub> -07-6 | ⑩       |
| Glyma07g36065 | Block_7_41437437_41493796            | 41437437 | 41493796 | 3 | /           | /                          | g-AAT <sub>DSF</sub> -07-6    | /          | /                          | /                          | /                          | ⑥/⑧     |
| Glyma07g37580 | 7_42582379_Block_7_42582011_42582424 | 42582011 | 42582424 | 2 | g-DSF-07-11 | /                          | /                             | g-DFM-07-7 | /                          | /                          | /                          | ⑩       |
| Glyma07g39110 | Block_7_43693801_43696239            | 43693801 | 43696239 | 3 | /           | /                          | /                             | /          | g-ADL <sub>DFM</sub> -07-7 | /                          | /                          | ⑩       |
| Glyma07g40260 | 7_44541413_Block_7_44537248_44546138 | 44537248 | 44546138 | 2 | /           | /                          | /                             | g-DFM-07-8 | g-ADL <sub>DFM</sub> -07-8 | g-AAT <sub>DFM</sub> -07-7 | /                          | ⑩       |
| Glyma08g02210 | Block_8_1535119_1544710              | 1535119  | 1544710  | 3 | /           | /                          | /                             | /          | g-ADL <sub>DFM</sub> -08-1 | /                          | /                          | ⑥/⑦     |
| Glyma08g03210 | Block_8_2261024_2271853              | 2261024  | 2271853  | 4 | g-DSF-08-1  | g-ADL <sub>DSF</sub> -08-1 | g-AAT <sub>DSF</sub> -08-1    | /          | /                          | /                          | /                          | ⑨       |
| Glyma08g04320 | Block_8_3033938_3038711              | 3033938  | 3038711  | 3 | /           | /                          | g-AAT <sub>DSF</sub> -08-2    | /          | /                          | /                          | /                          | ⑩       |
| Glyma08g04620 | 8_3293055_Block_8_3292737_3296203    | 3292737  | 3296203  | 2 | /           | /                          | /                             | g-DFM-08-1 | /                          | /                          | /                          | ⑤/⑧     |
| Glyma08g07050 | 8_5068701_Block_8_5068280_5070727    | 5068280  | 5070727  | 2 | /           | /                          | /                             | /          | /                          | g-AAT <sub>DFM</sub> -08-1 | /                          | ⑧       |
| Glyma08g09191 | Block_8_6571150_6576254              | 6571150  | 6576254  | 2 | /           | g-ADL <sub>DSF</sub> -08-2 | /                             | /          | /                          | /                          | /                          | ⑩       |
| Glyma08g10960 | Block_8_8000613_8002682              | 8000613  | 8002682  | 2 | /           | /                          | /                             | g-DFM-08-2 | /                          | /                          | /                          | ⑩       |
| Glyma08g11480 | Block_8_8346503_8349314              | 8346503  | 8349314  | 5 | /           | /                          | /                             | /          | /                          | /                          | g-AAT <sub>DFM</sub> -08-2 | ④/⑧     |
| Glyma08g12350 | Block_8_9027058_9030678              | 9027058  | 9030678  | 3 | /           | g-ADL <sub>DSF</sub> -08-3 | /                             | /          | /                          | /                          | /                          | ⑥/⑧     |
| Glyma08g13330 | Block_8_9749492_9754179              | 9749492  | 9754179  | 3 | /           | /                          | g-AAT <sub>DSF</sub> -08-3    | /          | /                          | /                          | /                          | ⑤/⑧     |
| Glyma08g14150 | Block_8_10274335_10274917            | 10274335 | 10274917 | 3 | /           | /                          | g-AAT <sub>DSF</sub> -08-4    | /          | /                          | /                          | /                          | ⑩       |
| Glyma08g15050 | 8_10932604_Block_8_10932560_10935883 | 10932560 | 10935883 | 2 | /           | /                          | /                             | /          | /                          | /                          | g-AAT <sub>DFM</sub> -08-3 | ⑤/⑦     |
| Glyma08g15181 | Block_8_10987261_11012066            | 10987261 | 11012066 | 3 | g-DSF-08-2  | /                          | /                             | /          | /                          | /                          | /                          | ⑩       |
| Glyma08g15250 | Block_8_11053202_11058521            | 11053202 | 11058521 | 3 | /           | /                          | /                             | g-DFM-08-3 | /                          | /                          | /                          | ⑥       |
| Glyma08g15400 | 8_11174733_Block_8_11172365_11176099 | 11172365 | 11176099 | 2 | /           | /                          | /                             | /          | g-ADL <sub>DFM</sub> -08-2 | g-AAT <sub>DFM</sub> -08-4 | /                          | ⑩       |
| Glyma08g15870 | 8_11557087_Block_8_11557045_11562288 | 11557045 | 11562288 | 2 | /           | /                          | /                             | g-DFM-08-4 | g-ADL <sub>DFM</sub> -08-3 | g-AAT <sub>DFM</sub> -08-5 | /                          | ⑩       |
| Glyma08g19780 | 8_14934134_Block_8_14933155_14936631 | 14933155 | 14936631 | 2 | /           | /                          | /                             | g-DFM-08-5 | /                          | /                          | /                          | ⑩       |
| Glyma08g20140 | Block_8_15201767_15207473            | 15201767 | 15207473 | 4 | /           | /                          | g-AAT <sub>DSF</sub> -08-5    | /          | /                          | /                          | /                          | ④/⑤     |
| Glyma08g20625 | 8_15627259_Block_8_15626690_15632810 | 15626690 | 15632810 | 2 | /           | /                          | /                             | g-DFM-08-6 | /                          | /                          | /                          | ⑧       |
| Glyma08g23480 | 8_17912868_Block_8_17912330_17917847 | 17912330 | 17917847 | 2 | /           | /                          | /                             | g-DFM-08-7 | /                          | /                          | /                          | ⑨       |
| Glyma08g23740 | Block_8_18086610_18090421            | 18086610 | 18090421 | 2 | /           | /                          | /                             | /          | g-ADL <sub>DFM</sub> -08-4 | /                          | /                          | ⑥       |
| Glyma08g24100 | Block_8_18313700_18317765            | 18313700 | 18317765 | 4 | /           | /                          | /                             | /          | /                          | /                          | g-AAT <sub>DFM</sub> -08-6 | ⑩       |
| Glyma08g24630 | Block_8_18774407_18802218            | 18774407 | 18802218 | 3 | /           | g-ADL <sub>DSF</sub> -08-4 | /                             | /          | /                          | /                          | /                          | ⑩       |
| Glyma08g27633 | Block_8_21938713_21952487            | 21938713 | 21952487 | 4 | /           | g-ADL <sub>DSF</sub> -08-5 | /                             | /          | /                          | /                          | /                          | ⑦       |

|               |                                        |          |          |   |             |                            |                            |            |                            |                            |       |
|---------------|----------------------------------------|----------|----------|---|-------------|----------------------------|----------------------------|------------|----------------------------|----------------------------|-------|
| Glyma08g28765 | 8_23143299_Block_8_23141865_23143429   | 23141865 | 23143429 | 2 | /           | /                          | /                          | g-DFM-08-8 | /                          | /                          | ⑩     |
| Glyma08g28890 | 8_23224982_Block_8_23224932_23235003   | 23224932 | 23235003 | 2 | /           | /                          | g-AAT <sub>DSF</sub> -08-6 | /          | /                          | /                          | ①/⑦   |
| Glyma08g28920 | Block_8_23268446_23275603              | 23268446 | 23275603 | 3 | /           | g-ADL <sub>DSF</sub> -08-6 | /                          | /          | /                          | /                          | ⑤/⑦   |
| Glyma08g40530 | 8_40251509_Block_8_40250975_40274353   | 40250975 | 40274353 | 2 | /           | /                          | /                          | g-DFM-08-9 | /                          | /                          | ⑥     |
| Glyma08g43140 | 8_43004125_Block_8_42997269_43005846   | 42997269 | 43005846 | 2 | /           | /                          | g-AAT <sub>DSF</sub> -08-7 | /          | /                          | /                          | ⑩     |
| Glyma08g43390 | Block_8_43227801_43230035              | 43227801 | 43230035 | 4 | g-DSF-08-3  | /                          | /                          | /          | /                          | /                          | ⑨     |
| Glyma08g43930 | Block_8_43701221_43703343              | 43701221 | 43703343 | 3 | /           | /                          | g-AAT <sub>DSF</sub> -08-8 | /          | /                          | /                          | ⑩     |
| Glyma08g44170 | 8_43905780_Block_8_43901065_43906255   | 43901065 | 43906255 | 2 | /           | /                          | /                          | /          | /                          | g-AAT <sub>DFM</sub> -08-7 | ⑩     |
| Glyma08g46480 | 8_45566429_Block_8_45566371_45566590   | 45566371 | 45566590 | 2 | /           | /                          | /                          | /          | g-ADL <sub>DFM</sub> -08-5 | /                          | ⑩     |
| Glyma08g47790 | Block_8_46591084_46595539              | 46591084 | 46595539 | 3 | /           | /                          | /                          | g-DFM-08-  | /                          | /                          | ⑨     |
| Glyma09g02470 | Block_9_1660441_1673841                | 1660441  | 1673841  | 3 | g-DSF-09-1  | /                          | g-AAT <sub>DSF</sub> -09-1 | /          | /                          | /                          | ⑧     |
| Glyma09g03270 | Block_9_2299604_2301800                | 2299604  | 2301800  | 3 | g-DSF-09-2  | /                          | /                          | /          | /                          | /                          | ⑥     |
| Glyma09g05600 | Block_9_4370951_4375513                | 4370951  | 4375513  | 3 | /           | /                          | /                          | /          | g-ADL <sub>DFM</sub> -09-1 | /                          | ⑧     |
| Glyma09g05830 | Block_9_4575404_4584274                | 4575404  | 4584274  | 3 | /           | /                          | /                          | /          | g-ADL <sub>DFM</sub> -09-2 | /                          | ⑥     |
| Glyma09g07661 | 9_6583848_Block_9_6578141_6584984      | 6578141  | 6584984  | 2 | /           | /                          | g-AAT <sub>DSF</sub> -09-2 | /          | /                          | /                          | ③     |
| Glyma09g07760 | Block_9_6694656_6699276                | 6694656  | 6699276  | 5 | /           | /                          | g-AAT <sub>DSF</sub> -09-3 | /          | g-ADL <sub>DFM</sub> -09-3 | /                          | ⑩     |
| Glyma09g07803 | Block_9_6807007_6807607                | 6807007  | 6807607  | 3 | g-DSF-09-3  | /                          | /                          | /          | /                          | /                          | ⑩     |
| Glyma09g08940 | Block_9_8400045_8401115                | 8400045  | 8401115  | 2 | g-DSF-09-4  | /                          | /                          | /          | /                          | /                          | ⑩     |
| Glyma09g14100 | Block_9_16051707_16054185              | 16051707 | 16054185 | 2 | /           | /                          | /                          | g-DFM-09-1 | /                          | /                          | ①/④/⑤ |
| Glyma09g16566 | 9_19825694_Block_9_19825263_19825844   | 19825263 | 19825844 | 2 | /           | /                          | /                          | g-DFM-09-2 | /                          | /                          | ①     |
| Glyma09g21070 | Block_9_25932104_25938309              | 25932104 | 25938309 | 3 | /           | g-ADL <sub>DSF</sub> -09-1 | /                          | /          | /                          | /                          | ⑥     |
| Glyma09g25215 | 9_31250163_Block_9_31248431_31268714   | 31248431 | 31268714 | 2 | g-DSF-09-5  | /                          | g-AAT <sub>DSF</sub> -09-4 | /          | /                          | /                          | ④/⑥   |
| Glyma09g26100 | 9_32368815_Block_9_32368761_32373907   | 32368761 | 32373907 | 2 | /           | /                          | /                          | /          | g-ADL <sub>DFM</sub> -09-4 | /                          | ⑥/⑦   |
| Glyma09g26970 | 9_33647491_Block_9_33640726_33647666   | 33640726 | 33647666 | 2 | /           | /                          | /                          | /          | /                          | g-AAT <sub>DFM</sub> -09-1 | ①     |
| Glyma09g27940 | Block_9_34892968_34904685              | 34892968 | 34904685 | 4 | /           | /                          | g-AAT <sub>DSF</sub> -09-5 | /          | /                          | /                          | ⑥     |
| Glyma09g28620 | Block_9_35533347_35543483              | 35533347 | 35543483 | 4 | /           | g-ADL <sub>DSF</sub> -09-2 | g-AAT <sub>DSF</sub> -09-6 | /          | /                          | /                          | ⑥     |
| Glyma09g31087 | 9_37848613_Block_9_37848070_37850595   | 37848070 | 37850595 | 2 | g-DSF-09-6  | g-ADL <sub>DSF</sub> -09-3 | /                          | /          | /                          | /                          | ⑧     |
| Glyma09g31850 | 9_38442924_Block_9_38441650_38446135   | 38441650 | 38446135 | 2 | /           | /                          | /                          | /          | g-ADL <sub>DFM</sub> -09-5 | /                          | ②     |
| Glyma09g31880 | 9_38477162_Block_9_38476089_38478338   | 38476089 | 38478338 | 2 | /           | g-ADL <sub>DSF</sub> -09-4 | /                          | /          | /                          | /                          | ⑤/⑦   |
| Glyma09g32350 | Block_9_38895413_38899033              | 38895413 | 38899033 | 3 | /           | /                          | g-AAT <sub>DSF</sub> -09-7 | /          | /                          | /                          | ⑩     |
| Glyma09g33010 | 9_39538681_Block_9_39534380_39539694   | 39534380 | 39539694 | 2 | /           | /                          | /                          | /          | g-ADL <sub>DFM</sub> -09-6 | /                          | ②     |
| Glyma09g33060 | Block_9_39589660_39601707              | 39589660 | 39601707 | 3 | /           | /                          | /                          | /          | g-ADL <sub>DFM</sub> -09-7 | /                          | ①     |
| Glyma09g33737 | 9_40208037_Block_9_40204509_40208918   | 40204509 | 40208918 | 2 | /           | /                          | /                          | /          | /                          | g-AAT <sub>DFM</sub> -09-2 | ⑧     |
| Glyma09g34750 | Block_9_41049391_41052262              | 41049391 | 41052262 | 3 | /           | g-ADL <sub>DSF</sub> -09-5 | /                          | /          | /                          | /                          | ⑦     |
| Glyma09g34850 | Block_9_41134020_41148470              | 41134020 | 41148470 | 4 | g-DSF-09-7  | /                          | g-AAT <sub>DSF</sub> -09-8 | /          | /                          | /                          | ⑨     |
| Glyma09g34940 | Block_9_41208615_41217803              | 41208615 | 41217803 | 2 | g-DSF-09-8  | /                          | /                          | /          | /                          | /                          | ⑧/⑨   |
| Glyma09g35651 | 9_41610410_Block_9_41608946_41610703   | 41608946 | 41610703 | 2 | /           | g-ADL <sub>DSF</sub> -09-6 | /                          | /          | /                          | /                          | ⑩     |
| Glyma09g36030 | Block_9_41902550_41905039              | 41902550 | 41905039 | 3 | /           | g-ADL <sub>DSF</sub> -09-7 | /                          | /          | /                          | /                          | ⑩     |
| Glyma09g37580 | 9_43103646_Block_9_43102797_43106909   | 43102797 | 43106909 | 2 | /           | g-ADL <sub>DSF</sub> -09-8 | /                          | /          | /                          | /                          | ⑧     |
| Glyma09g37840 | Block_9_43365821_43367092              | 43365821 | 43367092 | 3 | /           | /                          | /                          | g-DFM-09-3 | /                          | /                          | ⑦/⑧   |
| Glyma09g40181 | 9_45132400_Block_9_45131725_45136238   | 45131725 | 45136238 | 2 | g-DSF-09-9  | /                          | /                          | /          | /                          | /                          | ⑦     |
| Glyma09g40230 | Block_9_45183691_45200156              | 45183691 | 45200156 | 4 | g-DSF-09-10 | /                          | /                          | /          | /                          | /                          | ③/⑤/⑦ |
| Glyma09g40420 | 9_45344464_Block_9_45343525_45345356   | 45343525 | 45345356 | 2 | /           | /                          | /                          | g-DFM-09-4 | /                          | /                          | ⑩     |
| Glyma09g41010 | 9_45780183_Block_9_45777856_45781824   | 45777856 | 45781824 | 2 | /           | /                          | /                          | /          | g-ADL <sub>DFM</sub> -09-8 | /                          | ⑥/⑦   |
| Glyma09g41740 | Block_9_46386025_46392191              | 46386025 | 46392191 | 4 | /           | /                          | /                          | /          | /                          | g-AAT <sub>DFM</sub> -09-3 | ⑥     |
| Glyma10g01610 | Block_10_1173030_1174816               | 1173030  | 1174816  | 4 | /           | g-ADL <sub>DSF</sub> -10-1 | /                          | /          | /                          | /                          | ②     |
| Glyma10g04440 | 10_3429868_Block_10_3425870_3432231    | 3425870  | 3432231  | 2 | /           | g-ADL <sub>DSF</sub> -10-2 | /                          | /          | /                          | /                          | ⑩     |
| Glyma10g05051 | Block_10_3928785_3931038               | 3928785  | 3931038  | 5 | /           | /                          | /                          | /          | /                          | g-AAT <sub>DFM</sub> -10-1 | ①     |
| Glyma10g05100 | 10_3962179_Block_10_3958599_3962283    | 3958599  | 3962283  | 2 | /           | /                          | /                          | /          | g-ADL <sub>DFM</sub> -10-1 | /                          | ⑩     |
| Glyma10g05240 | 10_4055634_Block_10_4052536_4058533    | 4052536  | 4058533  | 2 | /           | /                          | /                          | g-DFM-10-1 | /                          | /                          | ⑩     |
| Glyma10g05451 | 10_4226921_Block_10_4226578_4229396    | 4226578  | 4229396  | 2 | /           | /                          | /                          | /          | g-ADL <sub>DFM</sub> -10-2 | /                          | ⑩     |
| Glyma10g05600 | 10_4391852_Block_10_4390605_4397865    | 4390605  | 4397865  | 2 | /           | /                          | /                          | /          | /                          | g-AAT <sub>DFM</sub> -10-2 | ⑧     |
| Glyma10g07601 | Block_10_6336194_6353470               | 6336194  | 6353470  | 2 | /           | /                          | /                          | /          | g-ADL <sub>DFM</sub> -10-3 | /                          | ④/⑤   |
| Glyma10g11480 | 10_11665125_Block_10_11665108_11670068 | 11665108 | 11670068 | 2 | /           | /                          | /                          | /          | g-ADL <sub>DFM</sub> -10-4 | /                          | ⑨     |
| Glyma10g11700 | Block_10_12029401_12038336             | 12029401 | 12038336 | 3 | g-DSF-10-1  | /                          | /                          | /          | /                          | /                          | ⑩     |
| Glyma10g14916 | Block_10_17311225_17312264             | 17311225 | 17312264 | 3 | /           | g-ADL <sub>DSF</sub> -10-3 | /                          | /          | /                          | /                          | ①     |
| Glyma10g17510 | Block_10_21068632_21074901             | 21068632 | 21074901 | 3 | /           | /                          | /                          | /          | g-ADL <sub>DFM</sub> -10-5 | /                          | ⑩     |
| Glyma10g19040 | 10_23575540_Block_10_23562546_23580815 | 23562546 | 23580815 | 2 | g-DSF-10-2  | /                          | /                          | /          | /                          | /                          | ⑩     |
| Glyma10g24391 | Block_10_31735985_31788880             | 31735985 | 31788880 | 4 | /           | /                          | g-AAT <sub>DSF</sub> -10-1 | /          | /                          | /                          | ⑤     |
| Glyma10g26450 | Block_10_34811615_34849713             | 34811615 | 34849713 | 5 | g-DSF-10-3  | g-ADL <sub>DSF</sub> -10-4 | g-AAT <sub>DSF</sub> -10-2 | g-DFM-10-2 | /                          | /                          | ③/④/⑤ |
| Glyma10g28380 | Block_10_37284406_37285368             | 37284406 | 37285368 | 3 | /           | /                          | /                          | /          | /                          | g-AAT <sub>DFM</sub> -10-3 | ⑤     |
| Glyma10g29380 | 10_38238991_Block_10_38238481_38240608 | 38238481 | 38240608 | 2 | g-DSF-10-4  | /                          | /                          | /          | /                          | /                          | ②     |
| Glyma10g29970 | Block_10_38676542_38684098             | 38676542 | 38684098 | 4 | /           | g-ADL <sub>DSF</sub> -10-5 | /                          | g-DFM-10-3 | g-ADL <sub>DFM</sub> -10-6 | /                          | ⑩     |
| Glyma10g30100 | Block_10_38803651_38835517             | 38803651 | 38835517 | 3 | g-DSF-10-5  | /                          | /                          | /          | /                          | /                          | ⑥     |

|               |                                        |          |          |   |            |                             |                            |                            |                            |                            |       |
|---------------|----------------------------------------|----------|----------|---|------------|-----------------------------|----------------------------|----------------------------|----------------------------|----------------------------|-------|
| Glyma10g30930 | Block_10_39522660_39535366             | 39522660 | 39535366 | 3 | /          | g-ADL <sub>DSF</sub> -10-6  | /                          | /                          | /                          | g-AAT <sub>DFM</sub> -10-4 | ⑩     |
| Glyma10g31570 | Block_10_40054950_40064518             | 40054950 | 40064518 | 3 | /          | g-ADL <sub>DSF</sub> -10-7  | /                          | /                          | /                          | g-AAT <sub>DFM</sub> -10-5 | ⑤     |
| Glyma10g31630 | 10_40129301_Block_10_40126866_40136942 | 40126866 | 40136942 | 2 | /          | /                           | /                          | g-DFM-10-4                 | /                          | /                          | ⑧     |
| Glyma10g32840 | 10_41219935_Block_10_41219377_41224009 | 41219377 | 41224009 | 2 | g-DSF-10-6 | /                           | /                          | /                          | /                          | /                          | ⑤     |
| Glyma10g34490 | Block_10_42652341_42660661             | 42652341 | 42660661 | 2 | /          | /                           | g-AAT <sub>DSF</sub> -10-3 | /                          | /                          | /                          | ⑨     |
| Glyma10g35640 | Block_10_43900600_43905731             | 43900600 | 43905731 | 3 | /          | g-ADL <sub>DSF</sub> -10-8  | /                          | /                          | /                          | /                          | ⑩     |
| Glyma10g35960 | 10_44166758_Block_10_44166593_44171098 | 44166593 | 44171098 | 2 | g-DSF-10-7 | /                           | g-AAT <sub>DSF</sub> -10-4 | /                          | /                          | /                          | ⑦     |
| Glyma10g36600 | Block_10_44716720_44738268             | 44716720 | 44738268 | 2 | /          | /                           | /                          | g-ADL <sub>DFM</sub> -10-7 | /                          | /                          | ①/②/⑤ |
| Glyma10g38360 | 10_46152334_Block_10_46151770_46155560 | 46151770 | 46155560 | 2 | g-DSF-10-8 | /                           | /                          | /                          | /                          | /                          | ⑨     |
| Glyma10g41540 | Block_10_48581481_48592231             | 48581481 | 48592231 | 3 | g-DSF-10-9 | /                           | /                          | /                          | /                          | /                          | ⑤     |
| Glyma10g41573 | 10_48621798_Block_10_48621686_48622700 | 48621686 | 48622700 | 2 | /          | g-ADL <sub>DSF</sub> -10-9  | /                          | /                          | /                          | /                          | ⑥     |
| Glyma10g41710 | Block_10_48727688_48732259             | 48727688 | 48732259 | 3 | /          | g-ADL <sub>DSF</sub> -10-10 | /                          | /                          | /                          | /                          | ⑩     |
| Glyma10g41880 | 10_48872958_Block_10_48872622_48878953 | 48872622 | 48878953 | 2 | /          | /                           | /                          | g-DFM-10-5                 | /                          | /                          | ⑧     |
| Glyma10g42161 | 10_49186092_Block_10_49185759_49186371 | 49185759 | 49186371 | 2 | /          | /                           | /                          | g-ADL <sub>DFM</sub> -10-8 | /                          | /                          | ④     |
| Glyma10g44540 | 10_50864800_Block_10_50858328_50873849 | 50858328 | 50873849 | 2 | /          | g-ADL <sub>DSF</sub> -10-11 | /                          | /                          | /                          | /                          | ⑧/⑨   |
| Glyma11g00600 | Block_11_265093_267332                 | 265093   | 267332   | 3 | /          | g-ADL <sub>DSF</sub> -11-1  | /                          | /                          | /                          | /                          | ⑤     |
| Glyma11g03130 | 11_2066444_Block_11_2065378_2068313    | 2065378  | 2068313  | 2 | /          | g-ADL <sub>DSF</sub> -11-2  | /                          | /                          | /                          | /                          | ⑩     |
| Glyma11g05990 | Block_11_4224828_4230097               | 4224828  | 4230097  | 3 | /          | /                           | g-AAT <sub>DSF</sub> -11-1 | /                          | /                          | /                          | ⑩     |
| Glyma11g06565 | Block_11_4592508_4615467               | 4592508  | 4615467  | 3 | /          | /                           | /                          | /                          | /                          | g-AAT <sub>DFM</sub> -11-1 | ⑧     |
| Glyma11g07620 | Block_11_5330309_5334423               | 5330309  | 5334423  | 4 | /          | /                           | /                          | g-DFM-11-1                 | /                          | /                          | ⑦     |
| Glyma11g09060 | 11_6408681_Block_11_6405862_6409752    | 6405862  | 6409752  | 2 | g-DSF-11-1 | /                           | /                          | /                          | /                          | /                          | ⑦/⑧   |
| Glyma11g09940 | 11_7102434_Block_11_7101664_7105757    | 7101664  | 7105757  | 2 | /          | /                           | /                          | /                          | /                          | g-AAT <sub>DFM</sub> -11-2 | ①/④   |
| Glyma11g10100 | Block_11_7212107_7225504               | 7212107  | 7225504  | 3 | g-DSF-11-2 | /                           | /                          | /                          | /                          | /                          | ①/⑧   |
| Glyma11g10430 | Block_11_7462670_7466540               | 7462670  | 7466540  | 2 | /          | /                           | /                          | /                          | /                          | g-AAT <sub>DFM</sub> -11-3 | ⑩     |
| Glyma11g10490 | Block_11_7497883_7501606               | 7497883  | 7501606  | 3 | /          | /                           | g-AAT <sub>DSF</sub> -11-2 | /                          | /                          | /                          | ⑩     |
| Glyma11g10600 | Block_11_7541681_7556953               | 7541681  | 7556953  | 4 | /          | /                           | /                          | g-ADL <sub>DFM</sub> -11-1 | /                          | /                          | ⑧     |
| Glyma11g10800 | Block_11_7670011_7688634               | 7670011  | 7688634  | 4 | /          | /                           | /                          | g-DFM-11-2                 | g-ADL <sub>DFM</sub> -11-2 | /                          | ⑩     |
| Glyma11g13111 | 11_9350699_Block_11_9349163_9350743    | 9349163  | 9350743  | 2 | /          | /                           | /                          | g-DFM-11-3                 | /                          | g-AAT <sub>DFM</sub> -11-4 | ⑩     |
| Glyma11g14300 | 11_10251477_Block_11_10251075_10254154 | 10251075 | 10254154 | 2 | /          | /                           | /                          | g-DFM-11-4                 | /                          | /                          | ⑩     |
| Glyma11g14500 | Block_11_10343999_10351257             | 10343999 | 10351257 | 3 | g-DSF-11-3 | /                           | g-AAT <sub>DSF</sub> -11-3 | /                          | /                          | g-AAT <sub>DFM</sub> -11-5 | ⑩     |
| Glyma11g17930 | 11_14382076_Block_11_14380273_14383275 | 14380273 | 14383275 | 2 | /          | /                           | /                          | /                          | /                          | g-AAT <sub>DFM</sub> -11-6 | ③/⑧   |
| Glyma11g19400 | 11_16088699_Block_11_16083609_16089141 | 16083609 | 16089141 | 2 | g-DSF-11-4 | /                           | /                          | /                          | /                          | /                          | ⑩     |
| Glyma11g19670 | Block_11_16445517_16464186             | 16445517 | 16464186 | 3 | g-DSF-11-5 | /                           | g-AAT <sub>DSF</sub> -11-4 | /                          | /                          | /                          | ⑧     |
| Glyma11g19735 | 11_16520623_Block_11_16520056_16521297 | 16520056 | 16521297 | 2 | /          | /                           | /                          | g-DFM-11-5                 | /                          | /                          | ⑩     |
| Glyma11g20520 | Block_11_17333852_17340583             | 17333852 | 17340583 | 3 | /          | /                           | /                          | /                          | /                          | g-AAT <sub>DFM</sub> -11-7 | ⑤     |
| Glyma11g25900 | 11_24638350_Block_11_24631407_24640036 | 24631407 | 24640036 | 2 | /          | /                           | g-AAT <sub>DSF</sub> -11-5 | /                          | /                          | /                          | ③     |
| Glyma11g27510 | Block_11_27324458_27333937             | 27324458 | 27333937 | 3 | /          | g-ADL <sub>DSF</sub> -11-3  | /                          | /                          | /                          | /                          | ⑤     |
| Glyma11g37010 | Block_11_38265014_38268252             | 38265014 | 38268252 | 4 | /          | g-ADL <sub>DSF</sub> -11-4  | /                          | /                          | /                          | /                          | ⑧     |
| Glyma11g37040 | 11_38281268_Block_11_38278427_38281487 | 38278427 | 38281487 | 2 | /          | g-ADL <sub>DSF</sub> -11-5  | /                          | g-DFM-11-6                 | /                          | /                          | ⑩     |
| Glyma11g37110 | 11_38334922_Block_11_38334231_38337768 | 38334231 | 38337768 | 2 | g-DSF-11-6 | /                           | /                          | /                          | /                          | /                          | ①     |
| Glyma12g02340 | Block_12_1487830_1490922               | 1487830  | 1490922  | 3 | /          | /                           | /                          | /                          | g-ADL <sub>DFM</sub> -12-1 | /                          | ⑤     |
| Glyma12g02800 | 12_1806889_Block_12_1806279_1809621    | 1806279  | 1809621  | 2 | /          | /                           | /                          | /                          | /                          | g-AAT <sub>DFM</sub> -12-1 | ⑩     |
| Glyma12g03580 | Block_12_2387698_2391706               | 2387698  | 2391706  | 3 | /          | /                           | /                          | g-DFM-12-1                 | /                          | /                          | ⑥     |
| Glyma12g05780 | Block_12_3878517_3882389               | 3878517  | 3882389  | 3 | g-DSF-12-1 | /                           | /                          | /                          | /                          | /                          | ⑨     |
| Glyma12g06580 | Block_12_4468579_4479376               | 4468579  | 4479376  | 4 | /          | g-ADL <sub>DSF</sub> -12-1  | /                          | g-DFM-12-2                 | g-ADL <sub>DFM</sub> -12-2 | g-AAT <sub>DFM</sub> -12-2 | ⑧     |
| Glyma12g06620 | 12_4503169_Block_12_4501755_4504431    | 4501755  | 4504431  | 2 | /          | g-ADL <sub>DSF</sub> -12-2  | /                          | g-DFM-12-3                 | /                          | g-AAT <sub>DFM</sub> -12-3 | ⑧     |
| Glyma12g06950 | 12_4739271_Block_12_4738726_4739974    | 4738726  | 4739974  | 2 | /          | /                           | /                          | g-DFM-12-4                 | g-ADL <sub>DFM</sub> -12-3 | g-AAT <sub>DFM</sub> -12-4 | ①     |
| Glyma12g08000 | Block_12_5663311_5669083               | 5663311  | 5669083  | 4 | g-DSF-12-2 | /                           | g-AAT <sub>DSF</sub> -12-1 | /                          | /                          | /                          | ⑩     |
| Glyma12g08100 | Block_12_5821873_5831329               | 5821873  | 5831329  | 5 | /          | /                           | /                          | /                          | /                          | g-AAT <sub>DFM</sub> -12-5 | ⑤/⑧   |
| Glyma12g08170 | Block_12_5914480_5919778               | 5914480  | 5919778  | 4 | /          | /                           | /                          | /                          | /                          | g-AAT <sub>DFM</sub> -12-6 | ①/④/⑤ |
| Glyma12g08390 | 12_6150215_Block_12_6150009_6152455    | 6150009  | 6152455  | 2 | /          | /                           | /                          | /                          | g-ADL <sub>DFM</sub> -12-4 | /                          | ⑨     |
| Glyma12g08860 | Block_12_6617948_6624348               | 6617948  | 6624348  | 2 | /          | /                           | /                          | g-DFM-12-5                 | /                          | /                          | ①     |
| Glyma12g10880 | Block_12_8887455_8891720               | 8887455  | 8891720  | 3 | /          | /                           | g-AAT <sub>DSF</sub> -12-2 | /                          | /                          | /                          | ⑩     |
| Glyma12g10890 | Block_12_8899651_8908334               | 8899651  | 8908334  | 3 | /          | g-ADL <sub>DSF</sub> -12-3  | /                          | /                          | /                          | /                          | ⑤     |
| Glyma12g14508 | Block_12_13421239_13425372             | 13421239 | 13425372 | 3 | /          | /                           | /                          | g-DFM-12-6                 | /                          | /                          | ⑧     |
| Glyma12g14530 | Block_12_13461156_13466569             | 13461156 | 13466569 | 2 | /          | /                           | /                          | g-DFM-12-7                 | /                          | /                          | ⑥     |
| Glyma12g30870 | Block_12_34465987_34478819             | 34465987 | 34478819 | 3 | g-DSF-12-3 | /                           | /                          | /                          | /                          | /                          | ⑩     |
| Glyma12g33700 | 12_36911058_Block_12_36910852_36912867 | 36910852 | 36912867 | 2 | /          | /                           | /                          | g-DFM-12-8                 | /                          | /                          | ⑩     |
| Glyma12g33940 | 12_37129476_Block_12_37128808_37132255 | 37128808 | 37132255 | 2 | /          | /                           | /                          | g-DFM-12-9                 | /                          | /                          | ⑩     |
| Glyma12g34830 | Block_12_37957118_37958990             | 37957118 | 37958990 | 3 | g-DSF-12-4 | /                           | g-AAT <sub>DSF</sub> -12-3 | /                          | /                          | /                          | ⑩     |
| Glyma12g35580 | 12_38720904_Block_12_38714312_38722934 | 38714312 | 38722934 | 2 | /          | /                           | /                          | /                          | g-ADL <sub>DFM</sub> -12-5 | /                          | ④     |
| Glyma12g36990 | Block_12_39980155_39984908             | 39980155 | 39984908 | 4 | g-DSF-12-5 | /                           | /                          | /                          | /                          | /                          | ⑩     |
| Glyma13g00960 | Block_13_684885_691843                 | 684885   | 691843   | 2 | /          | /                           | /                          | /                          | /                          | g-AAT <sub>DFM</sub> -13-1 | ⑤     |
| Glyma13g02620 | Block_13_2575157_2581713               | 2575157  | 2581713  | 3 | /          | /                           | g-AAT <sub>DSF</sub> -13-1 | /                          | /                          | /                          | ④/⑤   |

|               |                                        |          |          |   |            |                            |                            |            |                            |                             |         |
|---------------|----------------------------------------|----------|----------|---|------------|----------------------------|----------------------------|------------|----------------------------|-----------------------------|---------|
| Glyma13g06400 | Block_13_6646239_6649541               | 6646239  | 6649541  | 4 | /          | /                          | /                          | g-DFM-13-1 | /                          | /                           | ⑩       |
| Glyma13g07110 | Block_13_7287388_7291220               | 7287388  | 7291220  | 3 | g-DSF-13-1 | g-ADL <sub>DSF</sub> -13-1 | g-AAT <sub>DSF</sub> -13-2 | /          | /                          | /                           | ⑦       |
| Glyma13g08035 | Block_13_8281823_8290126               | 8281823  | 8290126  | 3 | /          | /                          | /                          | g-DFM-13-2 | /                          | /                           | ⑩       |
| Glyma13g08490 | 13_8984336_Block_13_8983497_8985302    | 8983497  | 8985302  | 2 | g-DSF-13-2 | /                          | /                          | /          | /                          | /                           | ⑤       |
| Glyma13g09341 | 13_10483239_Block_13_10473465_10483425 | 10473465 | 10483425 | 2 | /          | g-ADL <sub>DSF</sub> -13-2 | /                          | /          | /                          | /                           | ⑧       |
| Glyma13g09380 | Block_13_10605520_10610298             | 10605520 | 10610298 | 7 | /          | g-ADL <sub>DSF</sub> -13-3 | /                          | /          | /                          | /                           | ⑩       |
| Glyma13g09470 | Block_13_10895574_10904406             | 10895574 | 10904406 | 5 | /          | /                          | /                          | g-DFM-13-3 | g-ADL <sub>DFM</sub> -13-1 | g-AAT <sub>DFM</sub> -13-2  | ⑩       |
| Glyma13g09970 | Block_13_11526888_11545834             | 11526888 | 11545834 | 6 | g-DSF-13-3 | /                          | /                          | g-DFM-13-4 | /                          | /                           | ⑩       |
| Glyma13g16940 | Block_13_20802267_20807803             | 20802267 | 20807803 | 3 | /          | /                          | /                          | g-DFM-13-5 | /                          | /                           | ⑦       |
| Glyma13g21340 | Block_13_24828124_24832582             | 24828124 | 24832582 | 3 | g-DSF-13-4 | /                          | g-AAT <sub>DSF</sub> -13-3 | g-DFM-13-6 | /                          | /                           | ⑧       |
| Glyma13g22100 | 13_25685474_Block_13_25681768_25685789 | 25681768 | 25685789 | 2 | /          | /                          | /                          | /          | /                          | g-AAT <sub>DFM</sub> -13-3  | ⑥       |
| Glyma13g22420 | 13_25945441_Block_13_25941052_25946858 | 25941052 | 25946858 | 2 | /          | g-ADL <sub>DSF</sub> -13-4 | /                          | /          | /                          | g-AAT <sub>DFM</sub> -13-4  | ①/④/⑤   |
| Glyma13g22855 | Block_13_26354979_26359754             | 26354979 | 26359754 | 3 | /          | /                          | /                          | /          | /                          | g-AAT <sub>DFM</sub> -13-5  | ①       |
| Glyma13g22870 | Block_13_26364606_26370673             | 26364606 | 26370673 | 3 | /          | /                          | /                          | g-DFM-13-7 | /                          | /                           | ⑩       |
| Glyma13g23700 | Block_13_27046462_27049969             | 27046462 | 27049969 | 4 | /          | g-ADL <sub>DSF</sub> -13-5 | /                          | /          | /                          | /                           | ①/⑤     |
| Glyma13g23850 | Block_13_27156006_27164469             | 27156006 | 27164469 | 2 | /          | /                          | g-AAT <sub>DSF</sub> -13-4 | /          | /                          | /                           | ③/⑤/⑥   |
| Glyma13g24820 | Block_13_28131494_28133242             | 28131494 | 28133242 | 4 | /          | /                          | /                          | /          | /                          | g-AAT <sub>DFM</sub> -13-6  | ⑩       |
| Glyma13g25020 | Block_13_28314232_28322630             | 28314232 | 28322630 | 5 | /          | /                          | /                          | /          | g-ADL <sub>DFM</sub> -13-2 | /                           | ⑩       |
| Glyma13g25440 | Block_13_28671432_28677013             | 28671432 | 28677013 | 3 | /          | /                          | /                          | /          | g-ADL <sub>DFM</sub> -13-3 | /                           | ⑦       |
| Glyma13g25480 | Block_13_28726715_28731381             | 28726715 | 28731381 | 6 | g-DSF-13-5 | /                          | g-AAT <sub>DSF</sub> -13-5 | g-DFM-13-8 | g-ADL <sub>DFM</sub> -13-4 | g-AAT <sub>DFM</sub> -13-7  | ④       |
| Glyma13g26270 | Block_13_29477026_29479751             | 29477026 | 29479751 | 4 | /          | /                          | /                          | g-DFM-13-9 | /                          | /                           | ⑧       |
| Glyma13g28260 | Block_13_31295155_31304666             | 31295155 | 31304666 | 3 | /          | g-ADL <sub>DSF</sub> -13-6 | /                          | /          | /                          | g-AAT <sub>DFM</sub> -13-8  | ⑩       |
| Glyma13g28280 | Block_13_31329469_31331182             | 31329469 | 31331182 | 4 | /          | /                          | /                          | g-DFM-13-  | /                          | /                           | ⑧       |
| Glyma13g28570 | 13_31572160_Block_13_31566310_31573126 | 31566310 | 31573126 | 2 | /          | /                          | /                          | g-DFM-13-  | /                          | /                           | ⑧       |
| Glyma13g28880 | Block_13_31844610_31849725             | 31844610 | 31849725 | 4 | /          | /                          | /                          | g-DFM-13-  | g-ADL <sub>DFM</sub> -13-5 | /                           | ⑤       |
| Glyma13g29020 | 13_31994298_Block_13_31993588_31994897 | 31993588 | 31994897 | 2 | /          | /                          | g-AAT <sub>DSF</sub> -13-6 | /          | /                          | /                           | ⑩       |
| Glyma13g29160 | Block_13_32078442_32088927             | 32078442 | 32088927 | 4 | /          | /                          | /                          | /          | /                          | g-AAT <sub>DFM</sub> -13-9  | ⑤       |
| Glyma13g30420 | Block_13_33060875_33064957             | 33060875 | 33064957 | 3 | g-DSF-13-6 | /                          | /                          | /          | /                          | /                           | ⑩       |
| Glyma13g33260 | 13_35134648_Block_13_35134288_35142160 | 35134288 | 35142160 | 2 | g-DSF-13-7 | /                          | /                          | /          | /                          | /                           | ⑧       |
| Glyma13g34460 | Block_13_36025857_36027836             | 36025857 | 36027836 | 3 | /          | /                          | /                          | /          | g-ADL <sub>DFM</sub> -13-6 | /                           | ⑤       |
| Glyma13g36310 | 13_37593284_Block_13_37588242_37593338 | 37588242 | 37593338 | 2 | /          | /                          | /                          | /          | g-ADL <sub>DFM</sub> -13-7 | /                           | ④       |
| Glyma13g37360 | Block_13_38473481_38475796             | 38473481 | 38475796 | 3 | /          | g-ADL <sub>DSF</sub> -13-7 | /                          | /          | /                          | /                           | ⑩       |
| Glyma13g37980 | Block_13_38910618_38916143             | 38910618 | 38916143 | 5 | /          | g-ADL <sub>DSF</sub> -13-8 | /                          | /          | /                          | /                           | ⑧       |
| Glyma13g38860 | 13_39578208_Block_13_39578094_39583512 | 39578094 | 39583512 | 2 | /          | /                          | /                          | g-DFM-13-  | /                          | /                           | ⑧       |
| Glyma13g41650 | Block_13_41885202_41887421             | 41885202 | 41887421 | 3 | /          | /                          | g-AAT <sub>DSF</sub> -13-7 | /          | /                          | /                           | ⑥       |
| Glyma13g41660 | Block_13_41891593_41896067             | 41891593 | 41896067 | 3 | /          | g-ADL <sub>DSF</sub> -13-9 | /                          | /          | /                          | /                           | ②       |
| Glyma13g43050 | 13_42824070_Block_13_42821728_42825940 | 42821728 | 42825940 | 2 | g-DSF-13-8 | /                          | /                          | /          | /                          | /                           | ⑤/⑦     |
| Glyma13g43320 | Block_13_43059510_43062868             | 43059510 | 43062868 | 4 | /          | /                          | g-AAT <sub>DSF</sub> -13-8 | /          | /                          | /                           | ①/④     |
| Glyma13g43710 | 13_43321675_Block_13_43320620_43324933 | 43320620 | 43324933 | 2 | /          | /                          | /                          | g-DFM-13-  | /                          | /                           | ⑩       |
| Glyma13g43740 | Block_13_43347258_43352207             | 43347258 | 43352207 | 3 | /          | /                          | /                          | g-DFM-13-  | /                          | /                           | ④/⑤     |
| Glyma13g43980 | Block_13_43555734_43558530             | 43555734 | 43558530 | 3 | /          | /                          | /                          | /          | /                          | g-AAT <sub>DFM</sub> -13-10 | ⑩       |
| Glyma14g00240 | Block_14_38566_55214                   | 38566    | 55214    | 4 | /          | /                          | g-AAT <sub>DSF</sub> -14-1 | /          | /                          | /                           | ②       |
| Glyma14g01300 | 14_731787_Block_14_729911_732076       | 729911   | 732076   | 2 | /          | /                          | /                          | /          | /                          | g-AAT <sub>DFM</sub> -14-1  | ②       |
| Glyma14g02780 | Block_14_1754725_1777694               | 1754725  | 1777694  | 3 | /          | g-ADL <sub>DSF</sub> -14-1 | /                          | /          | /                          | g-AAT <sub>DFM</sub> -14-2  | ⑤       |
| Glyma14g02790 | Block_14_1779811_1782749               | 1779811  | 1782749  | 4 | /          | /                          | /                          | g-DFM-14-1 | /                          | /                           | ⑥       |
| Glyma14g02970 | Block_14_1874611_1878417               | 1874611  | 1878417  | 3 | /          | g-ADL <sub>DSF</sub> -14-2 | /                          | /          | /                          | /                           | ③       |
| Glyma14g04550 | 14_3127412_Block_14_3125618_3129187    | 3125618  | 3129187  | 2 | g-DSF-14-1 | /                          | /                          | /          | /                          | /                           | ②/⑤/⑥/⑦ |
| Glyma14g04690 | 14_3229763_Block_14_3228212_3230566    | 3228212  | 3230566  | 2 | /          | /                          | g-AAT <sub>DSF</sub> -14-2 | /          | /                          | /                           | ⑥       |
| Glyma14g04930 | Block_14_3397622_3417976               | 3397622  | 3417976  | 3 | /          | /                          | /                          | /          | /                          | g-AAT <sub>DFM</sub> -14-3  | ⑤       |
| Glyma14g05140 | 14_3557369_Block_14_3556870_3559677    | 3556870  | 3559677  | 2 | /          | /                          | g-AAT <sub>DSF</sub> -14-3 | /          | /                          | g-AAT <sub>DFM</sub> -14-4  | ⑩       |
| Glyma14g05780 | Block_14_4175805_4176959               | 4175805  | 4176959  | 3 | /          | /                          | /                          | g-DFM-14-2 | /                          | /                           | ⑩       |
| Glyma14g06485 | Block_14_4732326_4736259               | 4732326  | 4736259  | 2 | /          | /                          | /                          | /          | /                          | g-AAT <sub>DFM</sub> -14-5  | ②       |
| Glyma14g07960 | 14_6020513_Block_14_6019214_6022585    | 6019214  | 6022585  | 2 | /          | /                          | /                          | g-DFM-14-3 | /                          | /                           | ⑧       |
| Glyma14g08220 | Block_14_6246265_6255276               | 6246265  | 6255276  | 3 | g-DSF-14-2 | /                          | /                          | /          | /                          | /                           | ⑦       |
| Glyma14g08990 | 14_6980197_Block_14_6977153_6982492    | 6977153  | 6982492  | 2 | /          | /                          | /                          | /          | /                          | g-AAT <sub>DFM</sub> -14-6  | ⑩       |
| Glyma14g09160 | Block_14_7156524_7165117               | 7156524  | 7165117  | 3 | /          | /                          | /                          | /          | /                          | g-AAT <sub>DFM</sub> -14-7  | ⑤       |
| Glyma14g09720 | 14_7784672_Block_14_7783126_7789941    | 7783126  | 7789941  | 2 | /          | /                          | g-AAT <sub>DSF</sub> -14-4 | /          | /                          | /                           | ⑩       |
| Glyma14g10790 | 14_8993214_Block_14_8983532_8993833    | 8983532  | 8993833  | 2 | /          | /                          | /                          | g-DFM-14-4 | /                          | /                           | ⑧       |
| Glyma14g11910 | 14_10466685_Block_14_10466668_10467124 | 10466668 | 10467124 | 2 | g-DSF-14-3 | /                          | /                          | /          | /                          | /                           | ⑩       |
| Glyma14g13178 | Block_14_12402128_12404459             | 12402128 | 12404459 | 3 | /          | /                          | /                          | /          | /                          | g-AAT <sub>DFM</sub> -14-8  | ①       |
| Glyma14g13884 | Block_14_13496054_13501056             | 13496054 | 13501056 | 3 | /          | /                          | /                          | /          | g-ADL <sub>DFM</sub> -14-1 | /                           | ⑧       |
| Glyma14g14000 | Block_14_13739910_13746899             | 13739910 | 13746899 | 3 | /          | g-ADL <sub>DSF</sub> -14-3 | /                          | /          | /                          | /                           | ⑤/⑧     |
| Glyma14g16655 | 14_18101116_Block_14_18100820_18101237 | 18100820 | 18101237 | 2 | /          | /                          | /                          | g-DFM-14-5 | /                          | /                           | ⑩       |
| Glyma14g24140 | Block_14_28802503_28809364             | 28802503 | 28809364 | 3 | g-DSF-14-4 | /                          | /                          | /          | /                          | /                           | ⑦       |

|               |                                        |          |          |   |            |                            |                             |            |                            |                             |       |
|---------------|----------------------------------------|----------|----------|---|------------|----------------------------|-----------------------------|------------|----------------------------|-----------------------------|-------|
| Glyma14g24480 | Block_14_29369049_29373797             | 29369049 | 29373797 | 5 | /          | g-ADL <sub>DSF</sub> -14-4 | /                           | /          | /                          | /                           | ①/④/⑤ |
| Glyma14g33601 | Block_14_41615159_41617103             | 41615159 | 41617103 | 2 | /          | g-ADL <sub>DSF</sub> -14-5 | /                           | /          | /                          | /                           | ⑥     |
| Glyma14g34340 | Block_14_42804094_42808115             | 42804094 | 42808115 | 3 | g-DSF-14-5 | /                          | /                           | /          | /                          | /                           | ⑩     |
| Glyma14g36980 | 14_46293036_Block_14_46290924_46296420 | 46290924 | 46296420 | 2 | /          | /                          | g-AAT <sub>DSF</sub> -14-5  | /          | /                          | /                           | ⑥     |
| Glyma14g37100 | Block_14_46401128_46404683             | 46401128 | 46404683 | 2 | g-DSF-14-6 | /                          | /                           | /          | /                          | /                           | ⑩     |
| Glyma14g37230 | 14_46505411_Block_14_46504560_46509968 | 46504560 | 46509968 | 2 | /          | /                          | /                           | /          | /                          | g-AAT <sub>DFM</sub> -14-9  | ②     |
| Glyma14g37330 | Block_14_46632830_46636073             | 46632830 | 46636073 | 3 | g-DSF-14-7 | g-ADL <sub>DSF</sub> -14-6 | /                           | /          | /                          | /                           | ⑤/⑥   |
| Glyma14g37400 | Block_14_46677514_46682923             | 46677514 | 46682923 | 5 | g-DSF-14-8 | /                          | /                           | /          | /                          | /                           | ②     |
| Glyma14g38570 | Block_14_47699935_47706202             | 47699935 | 47706202 | 5 | g-DSF-14-9 | /                          | /                           | /          | /                          | g-AAT <sub>DFM</sub> -14-10 | ⑩     |
| Glyma14g38670 | Block_14_47831439_47847037             | 47831439 | 47847037 | 3 | /          | /                          | g-DFM-14-6                  | /          | /                          | /                           | ⑧     |
| Glyma14g38910 | Block_14_48074448_48076103             | 48074448 | 48076103 | 4 | /          | g-ADL <sub>DSF</sub> -14-7 | /                           | /          | /                          | /                           | ⑩     |
| Glyma14g39230 | 14_48338138_Block_14_48337568_48342410 | 48337568 | 48342410 | 2 | /          | /                          | /                           | /          | g-ADL <sub>DFM</sub> -14-2 | /                           | ⑨     |
| Glyma14g39375 | Block_14_48487254_48491153             | 48487254 | 48491153 | 3 | /          | /                          | g-AAT <sub>DSF</sub> -14-6  | /          | /                          | /                           | ⑩     |
| Glyma15g00460 | 15_225361_Block_15_223000_226044       | 223000   | 226044   | 2 | /          | /                          | g-AAT <sub>DSF</sub> -15-1  | /          | /                          | /                           | ⑧     |
| Glyma15g02740 | Block_15_1889553_1895693               | 1889553  | 1895693  | 3 | /          | /                          | /                           | /          | /                          | g-AAT <sub>DFM</sub> -15-1  | ⑤     |
| Glyma15g03770 | 15_2637919_Block_15_2636612_2643403    | 2636612  | 2643403  | 2 | g-DSF-15-1 | /                          | /                           | /          | /                          | /                           | ⑩     |
| Glyma15g04891 | 15_3468251_Block_15_3463074_3468299    | 3463074  | 3468299  | 2 | /          | /                          | g-AAT <sub>DSF</sub> -15-2  | /          | /                          | /                           | ⑩     |
| Glyma15g08420 | 15_5968645_Block_15_5967239_5969370    | 5967239  | 5969370  | 2 | g-DSF-15-2 | /                          | g-AAT <sub>DSF</sub> -15-3  | /          | g-ADL <sub>DFM</sub> -15-1 | /                           | ③/⑧   |
| Glyma15g09930 | 15_7174832_Block_15_7173630_7176788    | 7173630  | 7176788  | 2 | /          | /                          | /                           | /          | /                          | g-AAT <sub>DFM</sub> -15-2  | ⑩     |
| Glyma15g12930 | 15_9626056_Block_15_9622982_9626519    | 9622982  | 9626519  | 2 | /          | /                          | g-AAT <sub>DSF</sub> -15-4  | /          | /                          | /                           | ①/⑤   |
| Glyma15g13410 | 15_10030713_Block_15_10027724_10032923 | 10027724 | 10032923 | 2 | /          | /                          | g-AAT <sub>DSF</sub> -15-5  | /          | /                          | /                           | ⑩     |
| Glyma15g14040 | 15_10603758_Block_15_10602778_10604820 | 10602778 | 10604820 | 2 | /          | /                          | /                           | /          | /                          | g-AAT <sub>DFM</sub> -15-3  | ⑩     |
| Glyma15g15105 | Block_15_11548096_11552739             | 11548096 | 11552739 | 3 | /          | /                          | /                           | /          | /                          | g-AAT <sub>DFM</sub> -15-4  | ⑦     |
| Glyma15g16000 | 15_12337588_Block_15_12337020_12338452 | 12337020 | 12338452 | 2 | /          | g-ADL <sub>DSF</sub> -15-1 | /                           | /          | /                          | /                           | ⑩     |
| Glyma15g16183 | 15_12505828_Block_15_12503995_12508047 | 12503995 | 12508047 | 2 | /          | /                          | /                           | /          | /                          | g-AAT <sub>DFM</sub> -15-5  | ⑩     |
| Glyma15g17710 | 15_14114045_Block_15_14112549_14117855 | 14112549 | 14117855 | 2 | /          | /                          | /                           | g-DFM-15-1 | /                          | /                           | ⑧     |
| Glyma15g17910 | 15_14405044_Block_15_14401251_14407375 | 14401251 | 14407375 | 2 | g-DSF-15-3 | /                          | /                           | /          | /                          | /                           | ⑩     |
| Glyma15g18280 | Block_15_14974894_14976281             | 14974894 | 14976281 | 3 | g-DSF-15-4 | /                          | /                           | /          | /                          | g-AAT <sub>DFM</sub> -15-6  | ⑩     |
| Glyma15g18840 | 15_15753798_Block_15_15746068_15759417 | 15746068 | 15759417 | 2 | /          | /                          | g-AAT <sub>DSF</sub> -15-6  | /          | /                          | /                           | ⑩     |
| Glyma15g20200 | 15_18001506_Block_15_18000477_18002377 | 18000477 | 18002377 | 2 | /          | g-ADL <sub>DSF</sub> -15-2 | /                           | /          | /                          | /                           | ①     |
| Glyma15g20935 | 15_19013138_Block_15_19011461_19013314 | 19011461 | 19013314 | 2 | /          | g-ADL <sub>DSF</sub> -15-3 | /                           | /          | /                          | /                           | ①/④/⑤ |
| Glyma15g21101 | Block_15_19312624_19320437             | 19312624 | 19320437 | 5 | /          | /                          | /                           | g-DFM-15-2 | /                          | /                           | ⑦     |
| Glyma15g21400 | 15_19627890_Block_15_19627448_19628298 | 19627448 | 19628298 | 2 | /          | /                          | /                           | g-DFM-15-3 | /                          | /                           | ⑩     |
| Glyma15g25690 | Block_15_27227614_27231975             | 27227614 | 27231975 | 6 | /          | g-ADL <sub>DSF</sub> -15-4 | /                           | /          | /                          | /                           | ②/⑦   |
| Glyma15g34653 | Block_15_39178579_39182949             | 39178579 | 39182949 | 4 | /          | /                          | /                           | /          | g-ADL <sub>DFM</sub> -15-2 | /                           | ⑥     |
| Glyma15g34840 | Block_15_39414035_39430956             | 39414035 | 39430956 | 3 | g-DSF-15-5 | /                          | g-AAT <sub>DSF</sub> -15-7  | /          | /                          | /                           | ②/⑧   |
| Glyma15g35941 | Block_15_40858558_40869376             | 40858558 | 40869376 | 5 | /          | /                          | g-AAT <sub>DSF</sub> -15-8  | /          | /                          | /                           | ⑩     |
| Glyma15g38060 | Block_15_44140868_44144263             | 44140868 | 44144263 | 3 | /          | g-ADL <sub>DSF</sub> -15-5 | /                           | /          | /                          | /                           | ③/⑦   |
| Glyma15g40635 | Block_15_47614494_47615232             | 47614494 | 47615232 | 3 | /          | g-ADL <sub>DSF</sub> -15-6 | /                           | /          | /                          | /                           | ⑩     |
| Glyma15g40740 | Block_15_47715638_47720661             | 47715638 | 47720661 | 4 | /          | /                          | /                           | g-DFM-15-4 | /                          | /                           | ⑧     |
| Glyma15g40860 | Block_15_47868869_47873242             | 47868869 | 47873242 | 2 | g-DSF-15-6 | /                          | /                           | /          | /                          | /                           | ③     |
| Glyma15g42762 | Block_15_50194791_50195479             | 50194791 | 50195479 | 4 | /          | /                          | g-AAT <sub>DSF</sub> -15-9  | g-DFM-15-5 | /                          | /                           | ⑩     |
| Glyma15g43010 | Block_15_50437028_50445529             | 50437028 | 50445529 | 2 | /          | /                          | g-AAT <sub>DSF</sub> -15-10 | /          | /                          | /                           | ⑩     |
| Glyma15g43289 | Block_15_50799235_50850850             | 50799235 | 50850850 | 3 | /          | g-ADL <sub>DSF</sub> -15-7 | /                           | /          | /                          | /                           | ⑧     |
| Glyma16g00480 | 16_171389_Block_16_169598_172510       | 169598   | 172510   | 2 | /          | /                          | g-AAT <sub>DSF</sub> -16-1  | /          | /                          | /                           | ⑤     |
| Glyma16g01570 | 16_1144494_Block_16_1143927_1144717    | 1143927  | 1144717  | 2 | /          | /                          | /                           | g-DFM-16-1 | /                          | /                           | ⑩     |
| Glyma16g01590 | Block_16_1161767_1173675               | 1161767  | 1173675  | 3 | g-DSF-16-1 | /                          | /                           | /          | /                          | /                           | ⑥/⑧   |
| Glyma16g01640 | 16_1210399_Block_16_1208340_1211609    | 1208340  | 1211609  | 2 | /          | /                          | /                           | g-DFM-16-2 | /                          | /                           | ①     |
| Glyma16g03050 | Block_16_2639945_2645061               | 2639945  | 2645061  | 3 | /          | /                          | /                           | /          | g-ADL <sub>DFM</sub> -16-1 | /                           | ②/⑦   |
| Glyma16g03320 | 16_2833761_Block_16_2829076_2834759    | 2829076  | 2834759  | 2 | g-DSF-16-2 | g-ADL <sub>DSF</sub> -16-1 | g-AAT <sub>DSF</sub> -16-2  | /          | /                          | /                           | ①/③/⑧ |
| Glyma16g03860 | 16_3220100_Block_16_3217456_3225112    | 3217456  | 3225112  | 2 | /          | /                          | g-AAT <sub>DSF</sub> -16-3  | /          | /                          | /                           | ⑩     |
| Glyma16g06061 | Block_16_5494992_5499137               | 5494992  | 5499137  | 2 | g-DSF-16-3 | /                          | /                           | /          | /                          | /                           | ⑩     |
| Glyma16g07081 | 16_6380074_Block_16_6379430_6380140    | 6379430  | 6380140  | 2 | /          | /                          | /                           | /          | /                          | g-AAT <sub>DFM</sub> -16-1  | ⑩     |
| Glyma16g07920 | Block_16_7170521_7173384               | 7170521  | 7173384  | 5 | /          | /                          | /                           | /          | g-ADL <sub>DFM</sub> -16-2 | /                           | ④/⑧   |
| Glyma16g08430 | Block_16_7802131_7816483               | 7802131  | 7816483  | 4 | /          | /                          | g-AAT <sub>DSF</sub> -16-4  | /          | /                          | /                           | ⑤     |
| Glyma16g21340 | 16_24112677_Block_16_24104853_24115455 | 24104853 | 24115455 | 2 | /          | /                          | /                           | /          | g-ADL <sub>DFM</sub> -16-3 | /                           | ①     |
| Glyma16g25185 | Block_16_29113287_29120351             | 29113287 | 29120351 | 5 | /          | g-ADL <sub>DSF</sub> -16-2 | /                           | /          | /                          | /                           | ⑩     |
| Glyma16g25500 | 16_29515255_Block_16_29512183_29516034 | 29512183 | 29516034 | 2 | /          | /                          | /                           | g-DFM-16-3 | /                          | g-AAT <sub>DFM</sub> -16-2  | ⑩     |
| Glyma16g26070 | Block_16_30236691_30240706             | 30236691 | 30240706 | 3 | /          | /                          | /                           | /          | g-ADL <sub>DFM</sub> -16-4 | /                           | ⑧     |
| Glyma16g26260 | 16_30397806_Block_16_30395343_30398007 | 30395343 | 30398007 | 2 | g-DSF-16-4 | /                          | /                           | /          | /                          | /                           | ⑤     |
| Glyma16g27521 | Block_16_31521384_31526237             | 31521384 | 31526237 | 5 | /          | /                          | /                           | /          | g-ADL <sub>DFM</sub> -16-5 | /                           | ⑥     |
| Glyma16g28010 | Block_16_31958024_31960129             | 31958024 | 31960129 | 6 | /          | /                          | /                           | g-DFM-16-4 | /                          | /                           | ⑩     |
| Glyma16g28900 | Block_16_32848703_32854454             | 32848703 | 32854454 | 6 | /          | /                          | /                           | /          | /                          | g-AAT <sub>DFM</sub> -16-3  | ⑥     |
| Glyma16g28910 | Block_16_32858500_32864802             | 32858500 | 32864802 | 4 | g-DSF-16-5 | /                          | /                           | /          | /                          | /                           | ⑥     |

|               |                                        |          |          |   |             |                            |                            |                            |                            |                                                       |       |
|---------------|----------------------------------------|----------|----------|---|-------------|----------------------------|----------------------------|----------------------------|----------------------------|-------------------------------------------------------|-------|
| Glyma16g28950 | 16_32886079_Block_16_32884194_32887373 | 32884194 | 32887373 | 2 | /           | /                          | g-AAT <sub>DSF</sub> -16-5 | /                          | /                          | /                                                     | ⑩     |
| Glyma16g29380 | Block_16_33209634_33211251             | 33209634 | 33211251 | 5 | /           | /                          | /                          | /                          | g-ADL <sub>DFM</sub> -16-6 | /                                                     | ⑩     |
| Glyma16g31862 | Block_16_35127702_35136429             | 35127702 | 35136429 | 6 | /           | /                          | /                          | /                          | g-ADL <sub>DFM</sub> -16-7 | /                                                     | ⑤     |
| Glyma16g32650 | Block_16_35816783_35821972             | 35816783 | 35821972 | 3 | /           | /                          | g-AAT <sub>DSF</sub> -16-6 | /                          | /                          | /                                                     | ①     |
| Glyma16g32900 | 16_36008357_Block_16_36004646_36008731 | 36004646 | 36008731 | 2 | /           | /                          | /                          | /                          | /                          | g-AAT <sub>DFM</sub> -16-4                            | ⑧     |
| Glyma16g33100 | Block_16_36147325_36152970             | 36147325 | 36152970 | 4 | /           | /                          | g-ADL <sub>DSF</sub> -16-3 | /                          | /                          | g-ADL <sub>DFM</sub> -16-8 g-AAT <sub>DFM</sub> -16-5 | ⑧     |
| Glyma16g33320 | Block_16_36274053_36275350             | 36274053 | 36275350 | 4 | /           | /                          | /                          | /                          | g-DFM-16-5                 | /                                                     | ①     |
| Glyma16g33480 | Block_16_36382669_36389982             | 36382669 | 36389982 | 3 | /           | /                          | g-ADL <sub>DSF</sub> -16-4 | /                          | /                          | /                                                     | ⑩     |
| Glyma16g33490 | 16_36402209_Block_16_36393979_36402415 | 36393979 | 36402415 | 2 | /           | /                          | /                          | /                          | /                          | g-AAT <sub>DFM</sub> -16-6                            | ⑧     |
| Glyma16g33881 | 16_36637389_Block_16_36635980_36642060 | 36635980 | 36642060 | 2 | g-DSF-16-6  | /                          | /                          | /                          | /                          | /                                                     | ⑧     |
| Glyma16g34500 | 16_37145466_Block_16_37141578_37146092 | 37141578 | 37146092 | 2 | /           | /                          | g-AAT <sub>DSF</sub> -16-7 | /                          | /                          | /                                                     | ⑥     |
| Glyma17g01160 | Block_17_665467_668559                 | 665467   | 668559   | 3 | /           | /                          | /                          | /                          | g-ADL <sub>DFM</sub> -17-1 | g-AAT <sub>DFM</sub> -17-1                            | ⑥     |
| Glyma17g01430 | 17_882135_Block_17_881726_889368       | 881726   | 889368   | 2 | /           | /                          | g-ADL <sub>DSF</sub> -17-1 | /                          | /                          | /                                                     | ⑤     |
| Glyma17g02580 | 17_1671484_Block_17_1670664_1675695    | 1670664  | 1675695  | 2 | g-DSF-17-1  | /                          | /                          | /                          | /                          | /                                                     | ①/⑧   |
| Glyma17g02610 | 17_1695837_Block_17_1695425_1698332    | 1695425  | 1698332  | 2 | /           | /                          | /                          | /                          | g-ADL <sub>DFM</sub> -17-2 | /                                                     | ⑩     |
| Glyma17g03020 | Block_17_2013037_2021174               | 2013037  | 2021174  | 3 | g-DSF-17-2  | /                          | /                          | /                          | /                          | /                                                     | ①/⑧   |
| Glyma17g03310 | 17_2199947_Block_17_2199774_2207217    | 2199774  | 2207217  | 2 | /           | /                          | /                          | /                          | /                          | g-AAT <sub>DFM</sub> -17-2                            | ⑤     |
| Glyma17g03700 | Block_17_2460791_2467923               | 2460791  | 2467923  | 3 | g-DSF-17-3  | /                          | /                          | /                          | /                          | g-AAT <sub>DFM</sub> -17-3                            | ①/⑦/⑧ |
| Glyma17g04580 | Block_17_3036494_3043507               | 3036494  | 3043507  | 3 | /           | /                          | g-ADL <sub>DSF</sub> -17-2 | /                          | /                          | g-ADL <sub>DFM</sub> -17-3                            | ⑩     |
| Glyma17g04661 | 17_3116147_Block_17_3107379_3117305    | 3107379  | 3117305  | 2 | /           | /                          | /                          | /                          | g-DFM-17-1                 | /                                                     | ⑩     |
| Glyma17g05595 | Block_17_3919983_3925841               | 3919983  | 3925841  | 3 | /           | /                          | g-AAT <sub>DSF</sub> -17-1 | /                          | /                          | /                                                     | ⑩     |
| Glyma17g07475 | 17_5476527_Block_17_5475423_5477748    | 5475423  | 5477748  | 2 | /           | /                          | g-AAT <sub>DSF</sub> -17-2 | /                          | /                          | /                                                     | ⑥     |
| Glyma17g07520 | 17_5533847_Block_17_5530231_5535051    | 5530231  | 5535051  | 2 | /           | /                          | /                          | /                          | g-ADL <sub>DFM</sub> -17-4 | /                                                     | ⑩     |
| Glyma17g08460 | 17_6262188_Block_17_6261605_6265100    | 6261605  | 6265100  | 2 | g-DSF-17-4  | g-ADL <sub>DSF</sub> -17-3 | g-AAT <sub>DSF</sub> -17-3 | /                          | /                          | /                                                     | ⑩     |
| Glyma17g08761 | Block_17_6450810_6453048               | 6450810  | 6453048  | 3 | g-DSF-17-5  | /                          | /                          | /                          | /                          | /                                                     | ①/⑤   |
| Glyma17g09500 | Block_17_7036098_7037342               | 7036098  | 7037342  | 3 | g-DSF-17-6  | g-ADL <sub>DSF</sub> -17-4 | g-AAT <sub>DSF</sub> -17-4 | /                          | /                          | /                                                     | ⑩     |
| Glyma17g13030 | 17_9933234_Block_17_9932589_9937345    | 9932589  | 9937345  | 2 | g-DSF-17-7  | /                          | /                          | /                          | /                          | /                                                     | ⑩     |
| Glyma17g13151 | 17_10076088_Block_17_10072523_10076834 | 10072523 | 10076834 | 2 | g-DSF-17-8  | /                          | /                          | /                          | /                          | /                                                     | ⑧     |
| Glyma17g13260 | 17_10133112_Block_17_10133099_10138244 | 10133099 | 10138244 | 2 | g-DSF-17-9  | /                          | /                          | /                          | /                          | g-AAT <sub>DFM</sub> -17-4                            | ⑤     |
| Glyma17g14370 | 17_11127728_Block_17_11125908_11127930 | 11125908 | 11127930 | 2 | /           | /                          | /                          | /                          | g-DFM-17-2                 | /                                                     | ⑤     |
| Glyma17g14700 | 17_11420924_Block_17_11420112_11426915 | 11420112 | 11426915 | 2 | /           | /                          | g-ADL <sub>DSF</sub> -17-5 | /                          | /                          | /                                                     | ⑤     |
| Glyma17g15350 | 17_12054147_Block_17_12051979_12058670 | 12051979 | 12058670 | 2 | /           | /                          | g-ADL <sub>DSF</sub> -17-6 | /                          | /                          | /                                                     | ⑩     |
| Glyma17g18472 | 17_15859300_Block_17_15858189_15860141 | 15858189 | 15860141 | 2 | g-DSF-17-10 | /                          | /                          | /                          | /                          | /                                                     | ⑩     |
| Glyma17g19084 | Block_17_16775473_16789795             | 16775473 | 16789795 | 4 | /           | /                          | /                          | /                          | g-ADL <sub>DFM</sub> -17-5 | g-AAT <sub>DFM</sub> -17-5                            | ②     |
| Glyma17g19660 | Block_17_17984224_17998298             | 17984224 | 17998298 | 3 | /           | /                          | /                          | /                          | g-DFM-17-3                 | /                                                     | ⑧     |
| Glyma17g20091 | Block_17_18616129_18625258             | 18616129 | 18625258 | 2 | /           | /                          | /                          | /                          | g-ADL <sub>DFM</sub> -17-6 | /                                                     | ⑩     |
| Glyma17g20310 | Block_17_19036301_19056856             | 19036301 | 19056856 | 3 | /           | /                          | /                          | /                          | g-DFM-17-4                 | /                                                     | ⑩     |
| Glyma17g33290 | 17_36989961_Block_17_36984683_36991283 | 36984683 | 36991283 | 2 | /           | /                          | /                          | /                          | /                          | g-AAT <sub>DFM</sub> -17-6                            | ⑩     |
| Glyma17g34321 | Block_17_38197208_38207675             | 38197208 | 38207675 | 4 | /           | /                          | /                          | /                          | g-DFM-17-5                 | /                                                     | ⑧     |
| Glyma17g34420 | 17_38383987_Block_17_38383284_38385387 | 38383284 | 38385387 | 2 | /           | /                          | /                          | /                          | g-ADL <sub>DFM</sub> -17-7 | /                                                     | ⑩     |
| Glyma17g35000 | Block_17_38955181_38964990             | 38955181 | 38964990 | 3 | /           | /                          | /                          | /                          | /                          | g-AAT <sub>DFM</sub> -17-7                            | ⑥     |
| Glyma17g35130 | 17_39128805_Block_17_39128793_39130600 | 39128793 | 39130600 | 2 | /           | /                          | g-ADL <sub>DSF</sub> -17-7 | /                          | /                          | /                                                     | ⑩     |
| Glyma18g01200 | Block_18_614911_619917                 | 614911   | 619917   | 2 | /           | /                          | g-AAT <sub>DSF</sub> -18-1 | /                          | /                          | /                                                     | ⑩     |
| Glyma18g01330 | 18_692942_Block_18_692176_695176       | 692176   | 695176   | 2 | /           | /                          | /                          | /                          | g-DFM-18-1                 | /                                                     | ③/⑨   |
| Glyma18g03180 | Block_18_2092774_2099488               | 2092774  | 2099488  | 3 | /           | /                          | g-AAT <sub>DSF</sub> -18-2 | /                          | /                          | /                                                     | ⑩     |
| Glyma18g04820 | Block_18_3568173_3572993               | 3568173  | 3572993  | 3 | /           | /                          | g-ADL <sub>DSF</sub> -18-1 | /                          | /                          | /                                                     | ①     |
| Glyma18g05730 | Block_18_4386790_4391397               | 4386790  | 4391397  | 2 | /           | /                          | /                          | /                          | g-DFM-18-2                 | /                                                     | ⑧     |
| Glyma18g06250 | 18_4826439_Block_18_4825078_4827763    | 4825078  | 4827763  | 2 | /           | /                          | /                          | /                          | g-DFM-18-3                 | /                                                     | ⑩     |
| Glyma18g07900 | Block_18_6642314_6646565               | 6642314  | 6646565  | 4 | g-DSF-18-1  | /                          | /                          | /                          | /                          | /                                                     | ⑥     |
| Glyma18g08180 | Block_18_6886734_6894553               | 6886734  | 6894553  | 3 | /           | /                          | g-ADL <sub>DSF</sub> -18-2 | /                          | /                          | /                                                     | ⑩     |
| Glyma18g08410 | Block_18_7172244_7175673               | 7172244  | 7175673  | 5 | g-DSF-18-2  | /                          | g-AAT <sub>DSF</sub> -18-3 | /                          | /                          | /                                                     | ⑥     |
| Glyma18g08440 | Block_18_7189698_7194501               | 7189698  | 7194501  | 3 | /           | /                          | g-AAT <sub>DSF</sub> -18-4 | /                          | /                          | /                                                     | ⑧     |
| Glyma18g10975 | Block_18_9819657_9820874               | 9819657  | 9820874  | 5 | g-DSF-18-3  | /                          | /                          | /                          | /                          | /                                                     | ⑩     |
| Glyma18g13175 | 18_12638179_Block_18_12637749_12639473 | 12637749 | 12639473 | 2 | /           | /                          | /                          | /                          | g-DFM-18-4                 | /                                                     | ⑩     |
| Glyma18g16761 | Block_18_17397537_17415871             | 17397537 | 17415871 | 4 | /           | /                          | g-ADL <sub>DSF</sub> -18-3 | /                          | /                          | /                                                     | ⑧     |
| Glyma18g16780 | 18_17457536_Block_18_17457285_17459790 | 17457285 | 17459790 | 2 | /           | /                          | /                          | /                          | g-DFM-18-5                 | /                                                     | ⑥     |
| Glyma18g17395 | Block_18_18652381_18659467             | 18652381 | 18659467 | 4 | g-DSF-18-4  | /                          | g-AAT <sub>DSF</sub> -18-5 | /                          | /                          | /                                                     | ⑧     |
| Glyma18g17515 | Block_18_18777277_18788681             | 18777277 | 18788681 | 3 | g-DSF-18-5  | /                          | g-AAT <sub>DSF</sub> -18-6 | /                          | /                          | /                                                     | ⑩     |
| Glyma18g18220 | Block_18_19601073_19605391             | 19601073 | 19605391 | 3 | /           | /                          | /                          | /                          | g-DFM-18-6                 | /                                                     | ⑩     |
| Glyma18g18230 | Block_18_19605936_19613492             | 19605936 | 19613492 | 3 | /           | /                          | /                          | /                          | g-ADL <sub>DFM</sub> -18-1 | /                                                     | ⑩     |
| Glyma18g18931 | 18_20445481_Block_18_20444942_20447244 | 20444942 | 20447244 | 2 | /           | /                          | g-AAT <sub>DSF</sub> -18-7 | /                          | /                          | /                                                     | ⑨     |
| Glyma18g20146 | Block_18_22012942_22022208             | 22012942 | 22022208 | 5 | /           | /                          | /                          | /                          | g-DFM-18-7                 | /                                                     | ⑩     |
| Glyma18g20820 | Block_18_23290240_23305385             | 23290240 | 23305385 | 3 | /           | /                          | g-AAT <sub>DSF</sub> -18-8 | /                          | /                          | /                                                     | ⑥     |
| Glyma18g26120 | 18_30001588_Block_18_30001494_30003858 | 30001494 | 30003858 | 2 | /           | /                          | g-ADL <sub>DSF</sub> -18-4 | g-AAT <sub>DSF</sub> -18-9 | /                          | /                                                     | ⑧     |

|               |                                        |          |          |   |            |                            |                              |            |                            |                            |       |
|---------------|----------------------------------------|----------|----------|---|------------|----------------------------|------------------------------|------------|----------------------------|----------------------------|-------|
| Glyma18g32696 | 18_38131474_Block_18_38129417_38133046 | 38129417 | 38133046 | 2 | /          | /                          | /                            | /          | /                          | g-AAT <sub>DFM</sub> -18-1 | ⑤     |
| Glyma18g38570 | Block_18_46204949_46211919             | 46204949 | 46211919 | 3 | /          | g-ADL <sub>DSF</sub> -18-5 | /                            | /          | /                          | /                          | ⑧     |
| Glyma18g42375 | Block_18_51370172_51397245             | 51370172 | 51397245 | 5 | /          | /                          | /                            | /          | g-ADL <sub>DFM</sub> -18-2 | /                          | ⑤     |
| Glyma18g44761 | Block_18_54485987_54490833             | 54485987 | 54490833 | 4 | /          | /                          | /                            | /          | g-ADL <sub>DFM</sub> -18-3 | /                          | ①/②/⑧ |
| Glyma18g45930 | 18_55633624_Block_18_55633146_55633688 | 55633146 | 55633688 | 2 | /          | /                          | /                            | /          | g-ADL <sub>DFM</sub> -18-4 | /                          | ⑦     |
| Glyma18g46220 | Block_18_55972986_55978204             | 55972986 | 55978204 | 4 | g-DSF-18-6 | /                          | /                            | /          | /                          | /                          | ③/⑤   |
| Glyma18g47720 | 18_57297218_Block_18_57296483_57300364 | 57296483 | 57300364 | 2 | /          | g-ADL <sub>DSF</sub> -18-6 | /                            | /          | /                          | /                          | ⑧     |
| Glyma18g48980 | Block_18_58376606_58381414             | 58376606 | 58381414 | 3 | /          | /                          | g-AAT <sub>DSF</sub> -18-10/ | /          | /                          | /                          | ⑧     |
| Glyma18g50725 | Block_18_59759202_59760572             | 59759202 | 59760572 | 3 | g-DSF-18-7 | /                          | /                            | /          | /                          | /                          | ⑩     |
| Glyma18g50910 | Block_18_59918843_59927288             | 59918843 | 59927288 | 5 | /          | /                          | g-AAT <sub>DSF</sub> -18-11/ | /          | /                          | /                          | ①/⑤   |
| Glyma18g51230 | Block_18_60165720_60171309             | 60165720 | 60171309 | 3 | /          | /                          | /                            | /          | g-AAT <sub>DFM</sub> -18-2 | /                          | ⑥     |
| Glyma18g51380 | 18_60294442_Block_18_60291630_60294654 | 60291630 | 60294654 | 2 | /          | /                          | /                            | /          | g-ADL <sub>DFM</sub> -18-5 | /                          | ⑥     |
| Glyma18g51970 | Block_18_60708698_60714044             | 60708698 | 60714044 | 5 | /          | /                          | /                            | /          | g-AAT <sub>DFM</sub> -18-3 | /                          | ⑨     |
| Glyma18g52250 | Block_18_60909376_60911025             | 60909376 | 60911025 | 6 | /          | g-ADL <sub>DSF</sub> -18-7 | /                            | /          | /                          | /                          | ⑩     |
| Glyma18g52381 | Block_18_61002939_61004309             | 61002939 | 61004309 | 4 | /          | /                          | g-AAT <sub>DSF</sub> -18-12/ | /          | /                          | /                          | ⑩     |
| Glyma18g53545 | Block_18_61809358_61858898             | 61809358 | 61858898 | 3 | /          | /                          | /                            | /          | g-ADL <sub>DFM</sub> -18-6 | /                          | ①/⑤   |
| Glyma18g53770 | Block_18_62047725_62052506             | 62047725 | 62052506 | 3 | /          | /                          | /                            | /          | g-AAT <sub>DFM</sub> -18-4 | /                          | ⑩     |
| Glyma18g53823 | Block_18_62079452_62111100             | 62079452 | 62111100 | 5 | /          | /                          | /                            | g-DFM-18-8 | /                          | /                          | ④/⑥   |
| Glyma19g01536 | Block_19_1154863_1156699               | 1154863  | 1156699  | 2 | /          | /                          | /                            | g-DFM-19-1 | /                          | /                          | ⑩     |
| Glyma19g03440 | Block_19_3454616_3467505               | 3454616  | 3467505  | 4 | /          | g-ADL <sub>DSF</sub> -19-1 | /                            | /          | /                          | /                          | ③/⑧   |
| Glyma19g03563 | Block_19_3570374_3577489               | 3570374  | 3577489  | 3 | /          | /                          | /                            | g-DFM-19-2 | /                          | /                          | ①     |
| Glyma19g03590 | Block_19_3628118_3637375               | 3628118  | 3637375  | 4 | /          | g-ADL <sub>DSF</sub> -19-2 | /                            | /          | g-ADL <sub>DFM</sub> -19-1 | /                          | ⑤     |
| Glyma19g09700 | 19_11441616_Block_19_11439881_11441814 | 11439881 | 11441814 | 2 | /          | /                          | /                            | /          | g-AAT <sub>DFM</sub> -19-1 | /                          | ⑩     |
| Glyma19g18581 | Block_19_22679426_22681115             | 22679426 | 22681115 | 3 | /          | /                          | /                            | /          | g-AAT <sub>DFM</sub> -19-2 | /                          | ⑦/⑧   |
| Glyma19g23640 | Block_19_29052814_29053161             | 29052814 | 29053161 | 4 | /          | g-ADL <sub>DSF</sub> -19-3 | g-AAT <sub>DSF</sub> -19-1   | /          | /                          | /                          | ②/⑤   |
| Glyma19g23740 | 19_29216496_Block_19_29215166_29216998 | 29215166 | 29216998 | 2 | /          | /                          | /                            | g-DFM-19-3 | g-ADL <sub>DFM</sub> -19-2 | /                          | ⑩     |
| Glyma19g25360 | 19_31573885_Block_19_31571762_31579663 | 31571762 | 31579663 | 2 | /          | /                          | /                            | /          | g-ADL <sub>DFM</sub> -19-3 | /                          | ①/⑤/⑨ |
| Glyma19g25980 | Block_19_32318849_32323452             | 32318849 | 32323452 | 3 | /          | /                          | /                            | g-DFM-19-4 | /                          | /                          | ⑩     |
| Glyma19g26950 | Block_19_34125594_34127499             | 34125594 | 34127499 | 4 | /          | /                          | /                            | g-DFM-19-5 | /                          | /                          | ⑤/⑧   |
| Glyma19g30690 | Block_19_38342154_38346150             | 38342154 | 38346150 | 3 | /          | /                          | /                            | g-DFM-19-6 | g-ADL <sub>DFM</sub> -19-4 | /                          | ⑩     |
| Glyma19g30750 | 19_38383377_Block_19_38380326_38388648 | 38380326 | 38388648 | 2 | /          | /                          | /                            | /          | g-AAT <sub>DFM</sub> -19-3 | /                          | ⑩     |
| Glyma19g32540 | Block_19_40279022_40285753             | 40279022 | 40285753 | 3 | /          | /                          | /                            | /          | g-AAT <sub>DFM</sub> -19-4 | /                          | ⑩     |
| Glyma19g32600 | Block_19_40353381_40355435             | 40353381 | 40355435 | 3 | g-DSF-19-1 | /                          | /                            | /          | /                          | /                          | ①/②/⑤ |
| Glyma19g33000 | Block_19_40675292_40679560             | 40675292 | 40679560 | 3 | g-DSF-19-2 | /                          | /                            | /          | g-AAT <sub>DFM</sub> -19-5 | /                          | ⑧     |
| Glyma19g33210 | Block_19_40823339_40832377             | 40823339 | 40832377 | 3 | /          | /                          | /                            | g-DFM-19-7 | g-ADL <sub>DFM</sub> -19-5 | /                          | ⑥     |
| Glyma19g33760 | Block_19_41347340_41350200             | 41347340 | 41350200 | 3 | /          | /                          | /                            | g-DFM-19-8 | /                          | /                          | ⑩     |
| Glyma19g34740 | 19_42346078_Block_19_42344178_42346426 | 42344178 | 42346426 | 2 | /          | /                          | /                            | g-DFM-19-9 | g-ADL <sub>DFM</sub> -19-6 | g-AAT <sub>DFM</sub> -19-6 | ⑤/⑧   |
| Glyma19g35130 | 19_42689150_Block_19_42688105_42690289 | 42688105 | 42690289 | 2 | g-DSF-19-3 | /                          | /                            | /          | /                          | /                          | ⑥     |
| Glyma19g36710 | 19_43972602_Block_19_43971782_43978119 | 43971782 | 43978119 | 2 | /          | /                          | g-AAT <sub>DSF</sub> -19-2   | /          | /                          | /                          | ②/⑤   |
| Glyma19g37230 | Block_19_44449368_44454119             | 44449368 | 44454119 | 4 | /          | g-ADL <sub>DSF</sub> -19-4 | /                            | /          | /                          | /                          | ⑩     |
| Glyma19g37840 | 19_44939715_Block_19_44938084_44939959 | 44938084 | 44939959 | 2 | /          | /                          | g-AAT <sub>DSF</sub> -19-3   | /          | /                          | /                          | ⑩     |
| Glyma19g38331 | Block_19_45251572_45253628             | 45251572 | 45253628 | 2 | /          | /                          | g-AAT <sub>DSF</sub> -19-4   | /          | /                          | /                          | ⑧     |
| Glyma19g39460 | 19_46127170_Block_19_46122809_46127574 | 46122809 | 46127574 | 2 | /          | g-ADL <sub>DSF</sub> -19-5 | /                            | /          | /                          | /                          | ⑤     |
| Glyma19g40710 | 19_47046223_Block_19_47045778_47047319 | 47045778 | 47047319 | 2 | /          | /                          | g-AAT <sub>DSF</sub> -19-5   | /          | g-ADL <sub>DFM</sub> -19-7 | /                          | ⑩     |
| Glyma19g42340 | 19_48358156_Block_19_48357660_48363317 | 48357660 | 48363317 | 2 | /          | /                          | g-AAT <sub>DSF</sub> -19-6   | /          | /                          | /                          | ①/⑧   |
| Glyma19g42710 | 19_48606661_Block_19_48604283_48607757 | 48604283 | 48607757 | 2 | g-DSF-19-4 | /                          | /                            | /          | /                          | /                          | ⑥     |
| Glyma19g43320 | 19_49010497_Block_19_49003312_49011107 | 49003312 | 49011107 | 2 | /          | g-ADL <sub>DSF</sub> -19-6 | /                            | /          | /                          | /                          | ⑧     |
| Glyma19g44310 | Block_19_49775282_49780336             | 49775282 | 49780336 | 3 | /          | g-ADL <sub>DSF</sub> -19-7 | /                            | /          | /                          | /                          | ②/⑦   |
| Glyma19g45170 | 19_50409190_Block_19_50408788_50410434 | 50408788 | 50410434 | 2 | /          | /                          | /                            | g-DFM-19-  | /                          | /                          | ⑩     |
| Glyma19g45260 | Block_19_50448994_50455339             | 50448994 | 50455339 | 3 | /          | /                          | /                            | g-DFM-19-  | /                          | /                          | ⑥     |
| Glyma20g00565 | Block_20_307927_343640                 | 307927   | 343640   | 2 | /          | /                          | g-AAT <sub>DSF</sub> -20-1   | /          | /                          | /                          | ⑩     |
| Glyma20g01960 | Block_20_1475786_1485655               | 1475786  | 1485655  | 3 | /          | /                          | /                            | /          | g-AAT <sub>DFM</sub> -20-1 | /                          | ⑩     |
| Glyma20g02500 | Block_20_2105970_2116545               | 2105970  | 2116545  | 3 | /          | /                          | /                            | /          | g-ADL <sub>DFM</sub> -20-1 | /                          | ⑩     |
| Glyma20g03100 | Block_20_2835013_2837565               | 2835013  | 2837565  | 5 | /          | /                          | /                            | g-DFM-20-1 | g-ADL <sub>DFM</sub> -20-2 | /                          | ⑩     |
| Glyma20g03330 | Block_20_3084883_3101046               | 3084883  | 3101046  | 3 | /          | g-ADL <sub>DSF</sub> -20-1 | /                            | /          | /                          | /                          | ⑩     |
| Glyma20g04761 | 20_5050178_Block_20_5050083_5052549    | 5050083  | 5052549  | 2 | /          | g-ADL <sub>DSF</sub> -20-2 | /                            | /          | /                          | /                          | ⑤/⑦   |
| Glyma20g08091 | Block_20_11238590_11252212             | 11238590 | 11252212 | 4 | g-DSF-20-1 | g-ADL <sub>DSF</sub> -20-3 | /                            | /          | /                          | /                          | ⑥     |
| Glyma20g18724 | Block_20_26281781_26283603             | 26281781 | 26283603 | 4 | g-DSF-20-2 | /                          | /                            | /          | /                          | /                          | ⑩     |
| Glyma20g20053 | Block_20_28438662_28457888             | 28438662 | 28457888 | 3 | /          | /                          | g-AAT <sub>DSF</sub> -20-2   | /          | /                          | /                          | ①/⑤   |
| Glyma20g21151 | Block_20_30190512_30193319             | 30190512 | 30193319 | 6 | /          | g-ADL <sub>DSF</sub> -20-4 | /                            | /          | /                          | /                          | ⑥     |
| Glyma20g23440 | 20_33308606_Block_20_33308277_33308965 | 33308277 | 33308965 | 3 | /          | /                          | /                            | /          | g-ADL <sub>DFM</sub> -20-3 | /                          | ⑩     |
| Glyma20g23960 | Block_20_33681687_33686199             | 33681687 | 33686199 | 2 | /          | /                          | /                            | /          | g-AAT <sub>DFM</sub> -20-2 | /                          | ⑩     |
| Glyma20g24830 | Block_20_34480819_34487611             | 34480819 | 34487611 | 6 | /          | /                          | g-AAT <sub>DSF</sub> -20-3   | /          | /                          | /                          | ⑦     |
| Glyma20g24860 | Block_20_34504617_34506172             | 34504617 | 34506172 | 3 | /          | /                          | g-AAT <sub>DSF</sub> -20-4   | /          | /                          | /                          | ⑩     |

|               |                                        |          |          |   |            |                              |                            |            |                            |                            |       |     |
|---------------|----------------------------------------|----------|----------|---|------------|------------------------------|----------------------------|------------|----------------------------|----------------------------|-------|-----|
| Glyma20g25100 | Block_20_34802615_34816002             | 34802615 | 34816002 | 3 | /          | /                            | /                          | /          | g-ADL <sub>DFM</sub> -20-4 | /                          | ⑥     |     |
| Glyma20g25790 | Block_20_35429047_35431858             | 35429047 | 35431858 | 4 | g-DSF-20-3 | /                            | /                          | /          | /                          | /                          | ⑨     |     |
| Glyma20g25800 | Block_20_35432475_35451008             | 35432475 | 35451008 | 4 | /          | g-ADL <sub>DSF</sub> -20-5   | /                          | /          | /                          | /                          | ⑩     |     |
| Glyma20g26220 | Block_20_35724559_35730480             | 35724559 | 35730480 | 5 | /          | g-ADL <sub>DSF</sub> -20-6   | /                          | /          | /                          | /                          | ①/②/⑧ |     |
| Glyma20g26360 | Block_20_35844700_35852990             | 35844700 | 35852990 | 2 | /          | /                            | g-AAT <sub>DSF</sub> -20-5 | /          | /                          | /                          | ⑩     |     |
| Glyma20g26460 | Block_20_35932379_35934804             | 35932379 | 35934804 | 3 | /          | /                            | /                          | /          | g-ADL <sub>DFM</sub> -20-5 | /                          | ⑩     |     |
| Glyma20g26640 | 20_36016966_Block_20_36016916_36018502 | 36016916 | 36018502 | 2 | /          | /                            | /                          | g-DFM-20-2 | /                          | /                          | ⑩     |     |
| Glyma20g27700 | 20_36788337_Block_20_36787573_36792384 | 36787573 | 36792384 | 2 | /          | /                            | /                          | g-DFM-20-3 | /                          | /                          | ⑥/⑧   |     |
| Glyma20g27950 | 20_36941504_Block_20_36940856_36943164 | 36940856 | 36943164 | 2 | /          | /                            | /                          | /          | g-ADL <sub>DFM</sub> -20-6 | /                          | ⑧     |     |
| Glyma20g30150 | 20_38870210_Block_20_38869243_38872002 | 38869243 | 38872002 | 2 | /          | /                            | /                          | /          | /                          | g-AAT <sub>DFM</sub> -20-3 | ⑤     |     |
| Glyma20g31060 | Block_20_39733750_39740377             | 39733750 | 39740377 | 3 | /          | /                            | /                          | /          | /                          | g-AAT <sub>DFM</sub> -20-4 | ⑩     |     |
| Glyma20g31551 | 20_40162565_Block_20_40161972_40167214 | 40161972 | 40167214 | 2 | /          | g-ADL <sub>DSF</sub> -20-7   | /                          | /          | /                          | /                          | ⑤/⑦   |     |
| Glyma20g32390 | Block_20_40994842_41005860             | 40994842 | 41005860 | 3 | /          | g-ADL <sub>DSF</sub> -20-8   | /                          | /          | g-ADL <sub>DFM</sub> -20-7 | /                          | ⑨     |     |
| Glyma20g32540 | 20_41157466_Block_20_41155444_41158105 | 41155444 | 41158105 | 2 | /          | /                            | /                          | /          | g-ADL <sub>DFM</sub> -20-8 | /                          | ⑤     |     |
| Glyma20g32720 | Block_20_41349894_41355859             | 41349894 | 41355859 | 3 | /          | /                            | /                          | /          | g-ADL <sub>DFM</sub> -20-9 | /                          | ⑩     |     |
| Glyma20g32980 | Block_20_41596150_41604390             | 41596150 | 41604390 | 4 | /          | g-ADL <sub>DSF</sub> -20-9   | /                          | /          | /                          | /                          | ①/⑧   |     |
| Glyma20g33235 | 20_41824369_Block_20_41824338_41824778 | 41824338 | 41824778 | 2 | g-DSF-20-4 | /                            | /                          | /          | /                          | /                          | ⑩     |     |
| Glyma20g33361 | 20_41958317_Block_20_41958296_41958857 | 41958296 | 41958857 | 2 | g-DSF-20-5 | /                            | /                          | /          | /                          | /                          | ⑦     |     |
| Glyma20g33430 | Block_20_42022850_42030461             | 42022850 | 42030461 | 4 | /          | g-ADL <sub>DSF</sub> -20-10/ | /                          | /          | /                          | /                          | ⑤     |     |
| Glyma20g34860 | Block_20_43160296_43164385             | 43160296 | 43164385 | 4 | /          | /                            | /                          | /          | /                          | g-AAT <sub>DFM</sub> -20-5 | ⑥     |     |
| Glyma20g34910 | 20_43227587_Block_20_43226352_43228993 | 43226352 | 43228993 | 2 | /          | /                            | /                          | g-DFM-20-4 | /                          | /                          | ①     |     |
| Glyma20g35670 | Block_20_43892894_43898014             | 43892894 | 43898014 | 4 | /          | /                            | /                          | g-DFM-20-5 | /                          | /                          | ⑤     |     |
| Glyma20g36400 | 20_44526859_Block_20_44524581_44527566 | 44524581 | 44527566 | 2 | /          | /                            | /                          | /          | /                          | g-AAT <sub>DFM</sub> -20-6 | ⑩     |     |
| Glyma20g37960 | 20_45697660_Block_20_45697077_45700299 | 45697077 | 45700299 | 2 | g-DSF-20-6 | /                            | /                          | /          | /                          | /                          | ⑧     |     |
| Glyma20g38090 | Block_20_45790561_45791426             | 45790561 | 45791426 | 3 | /          | g-ADL <sub>DSF</sub> -20-11/ | /                          | /          | /                          | /                          | ⑩     |     |
| Glyma20g38570 | Block_20_46131896_46134314             | 46131896 | 46134314 | 3 | g-DSF-20-7 | /                            | /                          | /          | /                          | /                          | ②/⑦   |     |
| Total         | 661                                    |          |          |   | 1876       | 141                          | 130                        | 130        | 135                        | 124                        | 129   | 789 |

Note: DSF: days from sowing-to-flowering; ADL<sub>DSF</sub>: DSF required accumulative day-length; AAT<sub>DSF</sub>: DSF required accumulative active temperature; DFM: days from flowering-to-maturity; ADL<sub>DFM</sub>: DFM required accumulative day-length; AAT<sub>DFM</sub>: DFM required accumulative active temperature.

Gene group: Gene Ontology groups. The four Gene Ontology categories with their groups are as follows: Category I: Genes related to flowering, seed and stem development, or response to light and temperature stimulation, including Group ①, genes related to flower development and growth; Group ②, genes related to light and circadian rhythm; and Group ③, genes related to temperature response. Category II: Translocation signal transduction; defense response; and genes related to DNA methylation, transcription, RNA processing, and chromosome modification, including Group ④, genes related to histone variants and chromosome modification; Group ⑤, genes related to DNA methylation, transcription, and RNA processing; and Group ⑥, genes related to signal transduction and transport. Category III: Primary metabolism genes related to secondary metabolism, including Group ⑦, genes related to plant hormones; Group ⑧, genes related to protein and lipid metabolism; and Group ⑨, genes related to sugar metabolism. Category IV: Genes related to biological processes and unknown functions, including Group ⑩, genes related to other processes or unannotated.

**Table S9** Important and active gene–alleles for six DSF- and DFM-related traits in the WSGP.

| Gene                 | Allele code | Allele effect | Gene Type |     |    |    | Gene                 | Allele code | Allele effect | Gene Type |     |    |    |
|----------------------|-------------|---------------|-----------|-----|----|----|----------------------|-------------|---------------|-----------|-----|----|----|
|                      |             |               | LC        | HBC | EM | SH |                      |             |               | LC        | HBC | EM | SH |
| <i>Glyma01g22830</i> | Ψa0         | −123.88       | √         |     | √  | √  | <i>Glyma17g08460</i> | §a0         | 20.29         | √         |     |    | √  |
|                      | Ψa1         | 123.88        | √         |     | √  | √  |                      | §a1         | −20.29        | √         |     |    | √  |
| <i>Glyma02g04190</i> | §a0         | −8.90         | √         |     | √  | √  | <i>Glyma17g09500</i> | §a0         | −9.90         | √         |     | √  | √  |
|                      | §a2         | 14.66         | √         |     | √  | √  |                      | §a1         | −8.76         | √         |     | √  | √  |
|                      | Ψa0         | −106.92       |           |     | √  | √  |                      | §a2         | 18.67         | √         |     | √  | √  |
|                      | Ψa2         | 156.96        |           |     | √  | √  |                      | Φa0         | −177.50       | √         |     | √  | √  |
|                      | Φa0         | −289.27       | √         |     | √  | √  |                      | Φa2         | 312.82        | √         |     | √  | √  |
|                      | Φa1         | −184.67       | √         |     | √  | √  | <i>Glyma18g08410</i> | §a4         | 7.78          | √         |     |    | √  |
|                      | Φa2         | 473.94        | √         |     | √  | √  |                      | Φa4         | 171.11        | √         |     |    | √  |
| <i>Glyma02g06420</i> | §a2         | −7.46         |           | √   | √  |    | <i>Glyma18g17395</i> | §a2         | −7.34         | √         |     | √  | √  |



|               |                             |         |   |   |   |   |                             |                                |                      |                    |   |   |   |
|---------------|-----------------------------|---------|---|---|---|---|-----------------------------|--------------------------------|----------------------|--------------------|---|---|---|
| Glyma04g16180 | Ψ <sup>a</sup> <sub>0</sub> | −88.59  |   | ✓ | ✓ |   | § <sup>a</sup> <sub>3</sub> | 14.95                          | ✓                    |                    | ✓ | ✓ |   |
|               | Ψ <sup>a</sup> <sub>3</sub> | 186.07  |   | ✓ | ✓ |   | ϕ <sup>a</sup> <sub>2</sub> | −204.51                        | ✓                    |                    | ✓ | ✓ |   |
| Glyma04g36240 | § <sup>a</sup> <sub>1</sub> | 9.54    |   | ✓ | ✓ | ✓ | ϕ <sup>a</sup> <sub>3</sub> | 291.53                         | ✓                    |                    | ✓ | ✓ |   |
|               | § <sup>a</sup> <sub>2</sub> | −12.41  |   | ✓ | ✓ | ✓ | Glyma19g03590               | Ψ <sup>a</sup> <sub>2</sub>    | 109.55               |                    | ✓ | ✓ |   |
| Glyma06g23580 | ϕ <sup>a</sup> <sub>1</sub> | 312.65  |   | ✓ | ✓ | ✓ | 20                          | Total 62 (30, 32) <sup>a</sup> | Inherent 35 (23, 12) | Emerged 27 (7, 20) |   |   |   |
|               | ϕ <sup>a</sup> <sub>2</sub> | −405.98 |   | ✓ | ✓ | ✓ | Glyma07g09420               | Ψ <sup>a</sup> <sub>4</sub>    | 9.80                 |                    | ✓ | ✓ |   |
|               | § <sup>a</sup> <sub>2</sub> | 12.73   | ✓ |   |   | ✓ | £ <sup>a</sup> <sub>4</sub> | 190.08                         | ✓                    |                    | ✓ | ✓ |   |
|               | § <sup>a</sup> <sub>3</sub> | −7.08   | ✓ |   |   | ✓ | Glyma07g10541               | £ <sup>a</sup> <sub>0</sub>    | −117.13              |                    | ✓ | ✓ |   |
|               | ϕ <sup>a</sup> <sub>2</sub> | 267.12  | ✓ |   |   | ✓ | Glyma10g29970               | Ψ <sup>a</sup> <sub>3</sub>    | −7.71                |                    | ✓ | ✓ |   |
| Glyma06g36380 | ϕ <sup>a</sup> <sub>3</sub> | −195.23 |   |   |   | ✓ | Glyma12g06620               | Ψ <sup>a</sup> <sub>1</sub>    | −9.23                |                    | ✓ | ✓ |   |
|               | ϕ <sup>a</sup> <sub>0</sub> | −163.07 | ✓ |   |   | ✓ | Ψ <sup>a</sup> <sub>0</sub> | 9.23                           |                      | ✓                  | ✓ | ✓ |   |
| Glyma08g27633 | ϕ <sup>a</sup> <sub>1</sub> | 163.07  | ✓ |   |   | ✓ | § <sup>a</sup> <sub>0</sub> | 275.51                         |                      | ✓                  | ✓ | ✓ |   |
|               | Ψ <sup>a</sup> <sub>0</sub> | −106.70 | ✓ |   |   | ✓ | § <sup>a</sup> <sub>1</sub> | −275.51                        |                      | ✓                  | ✓ | ✓ |   |
|               | Ψ <sup>a</sup> <sub>1</sub> | −113.23 | ✓ |   |   | ✓ | Glyma13g25480               | Ψ <sup>a</sup> <sub>1</sub>    | −9.68                | ✓                  |   | ✓ | ✓ |
|               | Ψ <sup>a</sup> <sub>3</sub> | 239.12  | ✓ |   |   | ✓ | £ <sup>a</sup> <sub>1</sub> | −143.00                        | ✓                    |                    | ✓ | ✓ |   |
| Glyma09g28620 | ϕ <sup>a</sup> <sub>3</sub> | 160.36  |   |   | ✓ | ✓ | § <sup>a</sup> <sub>1</sub> | −182.32                        | ✓                    |                    | ✓ | ✓ |   |
| Glyma10g26450 | § <sup>a</sup> <sub>4</sub> | 6.62    | ✓ |   |   | ✓ | § <sup>a</sup> <sub>2</sub> | 354.21                         | ✓                    |                    | ✓ | ✓ |   |
|               | ϕ <sup>a</sup> <sub>0</sub> | −174.83 | ✓ |   |   | ✓ | Ψ <sup>a</sup> <sub>4</sub> | 8.50                           | ✓                    |                    | ✓ | ✓ |   |
| Glyma11g14500 | ϕ <sup>a</sup> <sub>1</sub> | −141.07 | ✓ |   |   | ✓ | Ψ <sup>a</sup> <sub>5</sub> | 9.42                           | ✓                    |                    | ✓ | ✓ |   |
|               | ϕ <sup>a</sup> <sub>4</sub> | 349.77  | ✓ |   |   | ✓ | £ <sup>a</sup> <sub>4</sub> | −101.01                        |                      | ✓                  | ✓ |   |   |
|               | § <sup>a</sup> <sub>1</sub> | −6.46   |   |   |   | ✓ | Glyma16g07920               | § <sup>a</sup> <sub>0</sub>    | −208.33              |                    | ✓ | ✓ |   |
|               | § <sup>a</sup> <sub>2</sub> | 12.39   |   |   |   | ✓ | Glyma16g25500               | § <sup>a</sup> <sub>1</sub>    | 208.33               |                    | ✓ | ✓ |   |
|               | ϕ <sup>a</sup> <sub>1</sub> | −334.51 | ✓ |   |   | ✓ | Glyma16g33100               | £ <sup>a</sup> <sub>3</sub>    | −142.33              |                    | ✓ | ✓ |   |
| Glyma11g19670 | ϕ <sup>a</sup> <sub>2</sub> | 458.51  | ✓ |   |   | ✓ | Glyma17g01160               | £ <sup>a</sup> <sub>2</sub>    | −156.47              |                    | ✓ | ✓ |   |
|               | § <sup>a</sup> <sub>0</sub> | −6.33   |   |   |   | ✓ | Glyma19g30690               | Ψ <sup>a</sup> <sub>2</sub>    | −24.63               | ✓                  |   | ✓ | ✓ |
| Glyma12g08000 | § <sup>a</sup> <sub>2</sub> | 7.69    |   |   |   | ✓ | Ψ <sup>a</sup> <sub>0</sub> | 7.69                           | ✓                    |                    | ✓ | ✓ |   |
|               | § <sup>a</sup> <sub>2</sub> | 20.83   | ✓ |   |   | ✓ | Ψ <sup>a</sup> <sub>1</sub> | 16.94                          | ✓                    |                    | ✓ | ✓ |   |
| Glyma13g07110 | § <sup>a</sup> <sub>3</sub> | −21.69  | ✓ |   |   | ✓ | £ <sup>a</sup> <sub>2</sub> | −214.52                        | ✓                    |                    | ✓ | ✓ |   |
|               | ϕ <sup>a</sup> <sub>2</sub> | 151.62  | ✓ |   |   | ✓ | £ <sup>a</sup> <sub>0</sub> | 101.63                         | ✓                    |                    | ✓ | ✓ |   |
|               | ϕ <sup>a</sup> <sub>3</sub> | −267.39 | ✓ |   |   | ✓ | £ <sup>a</sup> <sub>1</sub> | 112.88                         | ✓                    |                    | ✓ | ✓ |   |
|               | § <sup>a</sup> <sub>2</sub> | 6.71    | ✓ | ✓ |   | ✓ | Glyma19g30750               | § <sup>a</sup> <sub>1</sub>    | −482.69              | ✓                  |   | ✓ |   |
|               | Ψ <sup>a</sup> <sub>0</sub> | −141.00 | ✓ | ✓ |   | ✓ | § <sup>a</sup> <sub>0</sub> | 482.69                         | ✓                    |                    | ✓ |   |   |
| Glyma15g34840 | Ψ <sup>a</sup> <sub>2</sub> | 212.08  | ✓ | ✓ |   | ✓ | Glyma19g34740               | £ <sup>a</sup> <sub>0</sub>    | −117.59              | ✓                  |   | ✓ | ✓ |
|               | ϕ <sup>a</sup> <sub>2</sub> | 228.74  | ✓ | ✓ |   | ✓ | £ <sup>a</sup> <sub>1</sub> | 117.59                         | ✓                    |                    | ✓ | ✓ |   |
| Glyma15g34840 | ϕ <sup>a</sup> <sub>1</sub> | −202.98 | ✓ |   |   | ✓ | § <sup>a</sup> <sub>0</sub> | −211.85                        |                      |                    | ✓ | ✓ |   |
|               | ϕ <sup>a</sup> <sub>2</sub> | 239.63  | ✓ |   |   | ✓ | § <sup>a</sup> <sub>1</sub> | 211.85                         |                      |                    | ✓ | ✓ |   |
| Glyma17g08460 | Ψ <sup>a</sup> <sub>0</sub> | −110.00 | ✓ |   |   | ✓ | 12                          | Total 31 (16, 15)              | Inherent 22 (9, 13)  | Emerged 9 (7, 2)   |   |   |   |
|               | Ψ <sup>a</sup> <sub>1</sub> | 110.00  | ✓ |   |   | ✓ |                             |                                |                      |                    |   |   |   |

Note: a0–a7 are the alleles of each gene, arranged in rising order (negative to positive) according to their effect value.

<sup>a</sup>: The number outside parentheses is the number of alleles, and the number inside parentheses is the number of negative and positive alleles; <sup>§</sup>: represents the allelic change in DSF; <sup>ψ</sup>: represents the allelic change in ADL<sub>DSF</sub>; <sup>φ</sup>: represents the allelic change in AAT<sub>DSF</sub>; <sup>¥</sup>: represents the allelic change in DFM; <sup>£</sup>: represents the allelic change in ADL<sub>DFM</sub>; <sup>§</sup>: represents the allelic change in AAT<sub>DFM</sub>. LC: represents the gene with  $R^2 \geq 1.5\%$ . HBC: genes with the top 10% of BC scores in PPI network genes; here, BC is betweenness centrality, a centrality measurement and assignment. EM: genes containing alleles that only appear in subpopulations "A", "B", "C", and "D" compared with subpopulation "O". SH: genes shared by DSF or DFM and required accumulative day-length and accumulative effective temperature.
